# Supplementary material for: New Polyphenols from a Deep Sea Spiromastix sp. Fungus, and Their Antibacterial Activities
Source: PubMed Central journal article supplement (PMC4413224; doi:10.3390/md13042526), 2015-04-22
Supplement: marinedrugs-13-02526-s001.pdf [file marinedrugs-13-02526-s001.pdf]

## Supplementary Information

- Figure S1.** IR spectrum of compound **1**.
- Figure S2.** Negative mode HRESIMS data of compound **1**.
- Figure S3.**  $^1\text{H}$  NMR spectrum of compound **1** in DMSO- $d_6$  (500 MHz).
- Figure S4.**  $^{13}\text{C}$  NMR spectrum of compound **1** in DMSO- $d_6$  (125 MHz).
- Figure S5.** HSQC spectrum of compound **1** in DMSO- $d_6$ .
- Figure S6.**  $^1\text{H}$ - $^1\text{H}$  COSY spectrum of compound **1** in DMSO- $d_6$ .
- Figure S7.** HMBC spectrum of compound **1** in DMSO- $d_6$ .
- Figure S7-1.** HMBC spectrum of compound **1** in DMSO- $d_6$  (part amplification).
- Figure S8.** NOESY spectrum of compound **1** in DMSO- $d_6$ .
- Figure S9.** IR spectrum of compound **2**.
- Figure S10.** Negative mode HRESIMS data of compound **2**.
- Figure S11.**  $^1\text{H}$  NMR spectrum of compound **2** in DMSO- $d_6$  (500 MHz).
- Figure S12.**  $^{13}\text{C}$  NMR spectrum of compound **2** in DMSO- $d_6$  (125 MHz).
- Figure S13.** HSQC spectrum of compound **2** in DMSO- $d_6$ .
- Figure S14.**  $^1\text{H}$ - $^1\text{H}$  COSY spectrum of compound **2** in DMSO- $d_6$ .
- Figure S15.** HMBC spectrum of compound **2** in DMSO- $d_6$ .
- Figure S16.** IR spectrum of compound **3**.
- Figure S17.** Negative mode HRESIMS data of compound **3**.
- Figure S18.**  $^1\text{H}$  NMR spectrum of compound **3** in DMSO- $d_6$  (400 MHz).
- Figure S19.**  $^{13}\text{C}$  NMR spectrum of compound **3** in DMSO- $d_6$  (100 MHz).
- Figure S20.** HSQC spectrum of compound **3** in DMSO- $d_6$ .
- Figure S21.**  $^1\text{H}$ - $^1\text{H}$  COSY spectrum of compound **3** in DMSO- $d_6$ .
- Figure S22.** HMBC spectrum of compound **3** in DMSO- $d_6$ .
- Figure S23.** IR spectrum of compound **4**.
- Figure S24.** Negative mode HRESIMS data of compound **4**.
- Figure S25.**  $^1\text{H}$  NMR spectrum of compound **4** in DMSO- $d_6$  (400 MHz).
- Figure S26.**  $^{13}\text{C}$  NMR spectrum of compound **4** in DMSO- $d_6$  (100 MHz).
- Figure S27.** HSQC spectrum of compound **4** in DMSO- $d_6$ .
- Figure S28.**  $^1\text{H}$ - $^1\text{H}$  COSY spectrum of compound **4** in DMSO- $d_6$ .
- Figure S29.** HMBC spectrum of compound **4** in DMSO- $d_6$ .
- Figure S30.** NOESY spectrum of compound **4** in DMSO- $d_6$ .
- Figure S31.** IR spectrum of compound **5**.
- Figure S32.** Negative mode HRESIMS data of compound **5**.
- Figure S33.**  $^1\text{H}$  NMR spectrum of compound **5** in DMSO- $d_6$  (400 MHz).
- Figure S34.**  $^{13}\text{C}$  NMR spectrum of compound **5** in DMSO- $d_6$  (100 MHz).
- Figure S35.** HSQC spectrum of compound **5** in DMSO- $d_6$ .
- Figure S36.**  $^1\text{H}$ - $^1\text{H}$  COSY spectrum of compound **5** in DMSO- $d_6$ .
- Figure S37.** HMBC spectrum of compound **5** in DMSO- $d_6$ .
- Figure S38.** IR Spectrum of compound **6**.
- Figure S39.** Negative mode HRESIMS data of compound **6**.
- Figure S40.**  $^1\text{H}$  NMR spectrum of compound **6** in DMSO- $d_6$  (600 MHz).
- Figure S41.**  $^{13}\text{C}$  NMR spectrum of compound **6** in DMSO- $d_6$  (150 MHz).
- Figure S42.** HSQC spectrum of compound **6** in DMSO- $d_6$ .
- Figure S43.**  $^1\text{H}$ - $^1\text{H}$  COSY spectrum of compound **6** in DMSO- $d_6$ .
- Figure S44.** HMBC spectrum of compound **6** in DMSO- $d_6$ .
- Figure S45.** IR spectrum of compound **7**.
- Figure S46.** Negative mode HRESIMS data of compound **7**.

- Figure S47.**  $^1\text{H}$  NMR spectrum of compound **7** in  $\text{DMSO-}d_6$  (400 MHz).
- Figure S48.**  $^{13}\text{C}$  NMR spectrum of compound **7** in  $\text{DMSO-}d_6$  (100 MHz).
- Figure S49.** HSQC spectrum of compound **7** in  $\text{DMSO-}d_6$ .
- Figure S50.**  $^1\text{H-}^1\text{H}$  COSY spectrum of compound **7** in  $\text{DMSO-}d_6$ .
- Figure S51.** HMBC spectrum of compound **7** in  $\text{DMSO-}d_6$ .
- Figure S52.** IR spectrum of compound **8**.
- Figure S53.** Negative mode HRESIMS data of compound **8**.
- Figure S54.**  $^1\text{H}$  NMR spectrum of compound **8** in  $\text{DMSO-}d_6$  (500 MHz).
- Figure S55.**  $^{13}\text{C}$  NMR spectrum of compound **8** in  $\text{DMSO-}d_6$  (125 MHz).
- Figure S56.** HSQC spectrum of compound **8** in  $\text{DMSO-}d_6$ .
- Figure S57.**  $^1\text{H-}^1\text{H}$  COSY spectrum of compound **8** in  $\text{DMSO-}d_6$ .
- Figure S58.** HMBC spectrum of compound **8** in  $\text{DMSO-}d_6$ .
- Figure S59.** IR spectrum of compound **9**.
- Figure S60.** Negative mode HRESIMS data of compound **9**.
- Figure S61.**  $^1\text{H}$  NMR spectrum of compound **9** in  $\text{DMSO-}d_6$  (400 MHz).
- Figure S62.**  $^{13}\text{C}$  NMR spectrum of compound **9** in  $\text{DMSO-}d_6$  (100 MHz).
- Figure S63.** HSQC spectrum of compound **9** in  $\text{DMSO-}d_6$ .
- Figure S64.**  $^1\text{H-}^1\text{H}$  COSY spectrum of compound **9** in  $\text{DMSO-}d_6$ .
- Figure S65.** HMBC spectrum of compound **9** in  $\text{DMSO-}d_6$ .
- Figure S66.** IR spectrum of compound **10**.
- Figure S67.** Negative mode HRESIMS data of compound **10**.
- Figure S68.**  $^1\text{H}$  NMR spectrum of compound **10** in  $\text{DMSO-}d_6$  (500 MHz).
- Figure S69.**  $^{13}\text{C}$  NMR spectrum of compound **10** in  $\text{DMSO-}d_6$  (125 MHz).
- Figure S70.** HSQC spectrum of compound **10** in  $\text{DMSO-}d_6$ .
- Figure S71.**  $^1\text{H-}^1\text{H}$  COSY spectrum of compound **10** in  $\text{DMSO-}d_6$ .
- Figure S72.** HMBC spectrum of compound **10** in  $\text{DMSO-}d_6$ .
- Figure S73.** IR spectrum of compound **11**.
- Figure S74.** Negative mode HRESIMS data of compound **11**.
- Figure S75.**  $^1\text{H}$  NMR spectrum of compound **11** in  $\text{DMSO-}d_6$  (400 MHz).
- Figure S76.**  $^{13}\text{C}$  NMR spectrum of compound **11** in  $\text{DMSO-}d_6$  (100 MHz).
- Figure S77.** HSQC spectrum of compound **11** in  $\text{DMSO-}d_6$ .
- Figure S78.**  $^1\text{H-}^1\text{H}$  COSY spectrum of compound **11** in  $\text{DMSO-}d_6$ .
- Figure S79.** HMBC spectrum of compound **11** in  $\text{DMSO-}d_6$ .
- Figure S80.** Negative mode ESIMS data of compound **10a**.
- Figure S81.**  $^1\text{H}$  NMR spectrum of compound **10a** in  $\text{CDCl}_3$  (400 MHz).
- Figure S82.**  $^{13}\text{C}$  NMR spectrum of compound **10a** in  $\text{CDCl}_3$  (100 MHz).
- Figure S83.** HSQC spectrum of compound **10a** in  $\text{CDCl}_3$ .
- Figure S84.**  $^1\text{H-}^1\text{H}$  COSY spectrum of compound **10a** in  $\text{CDCl}_3$ .
- Figure S85.** HMBC spectrum of compound **10a** in  $\text{CDCl}_3$ .

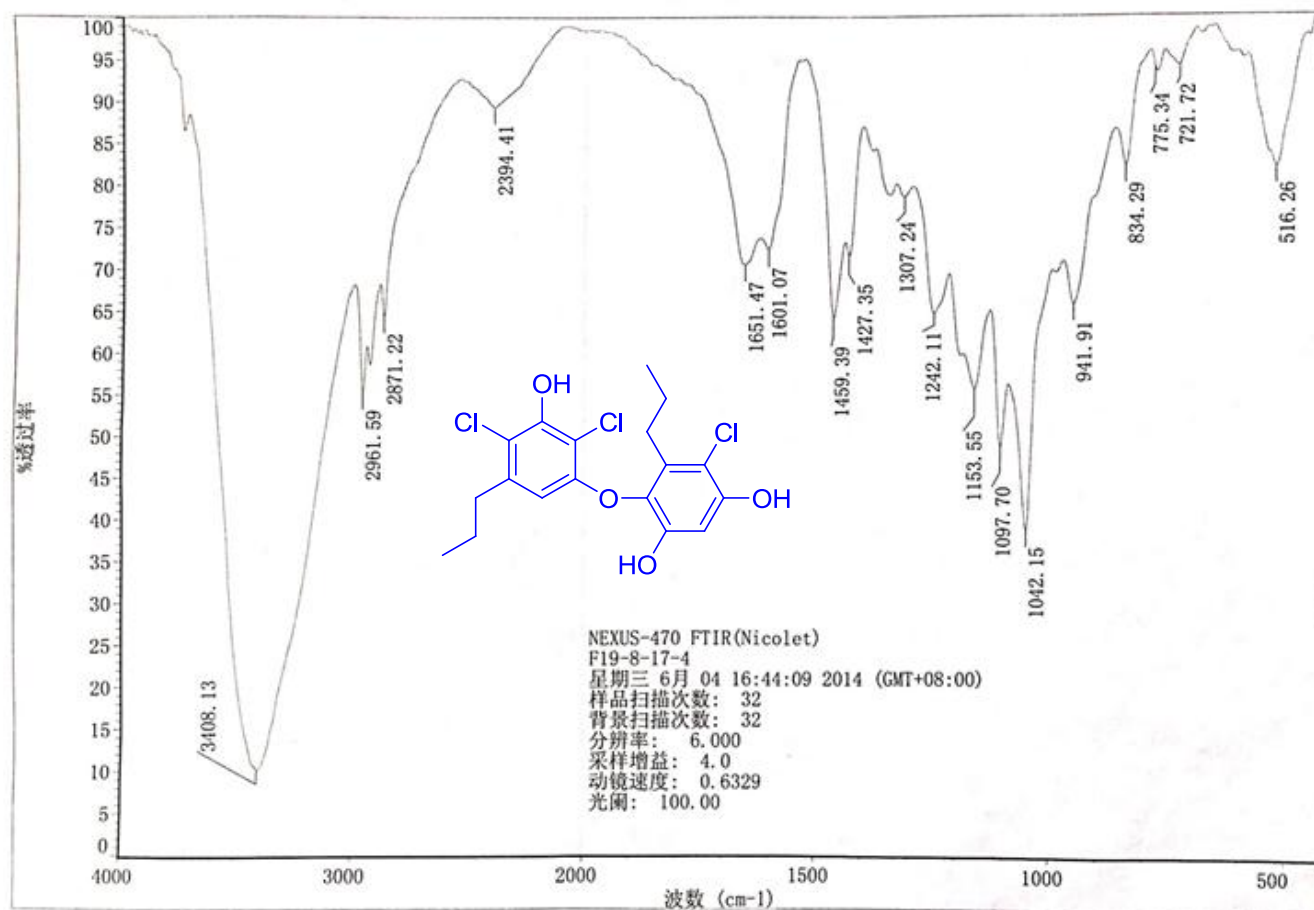

Figure S1. IR spectrum of compound 1.

Xevo G2 Q.TOF/YCA166#

07-Jul-2014

Waters

1: TOF MSES-  
4.54e4

F19-8-174 11 (0.216) Cm (11:16-(3:7+23:54))

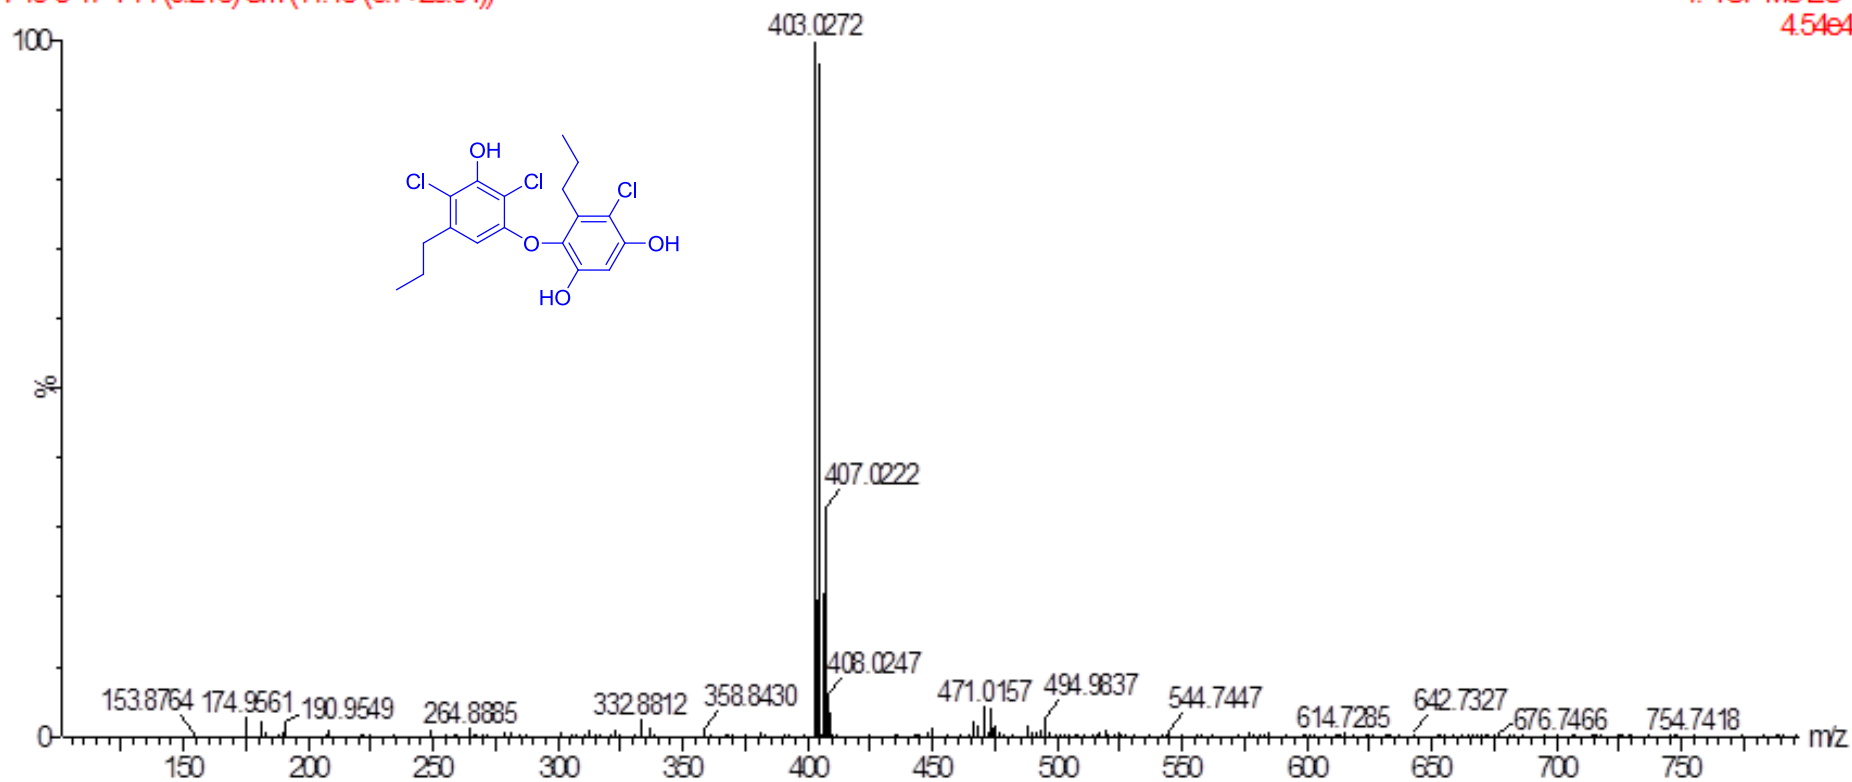**Figure S2.** Negative mode HRESIMS data of compound 1.

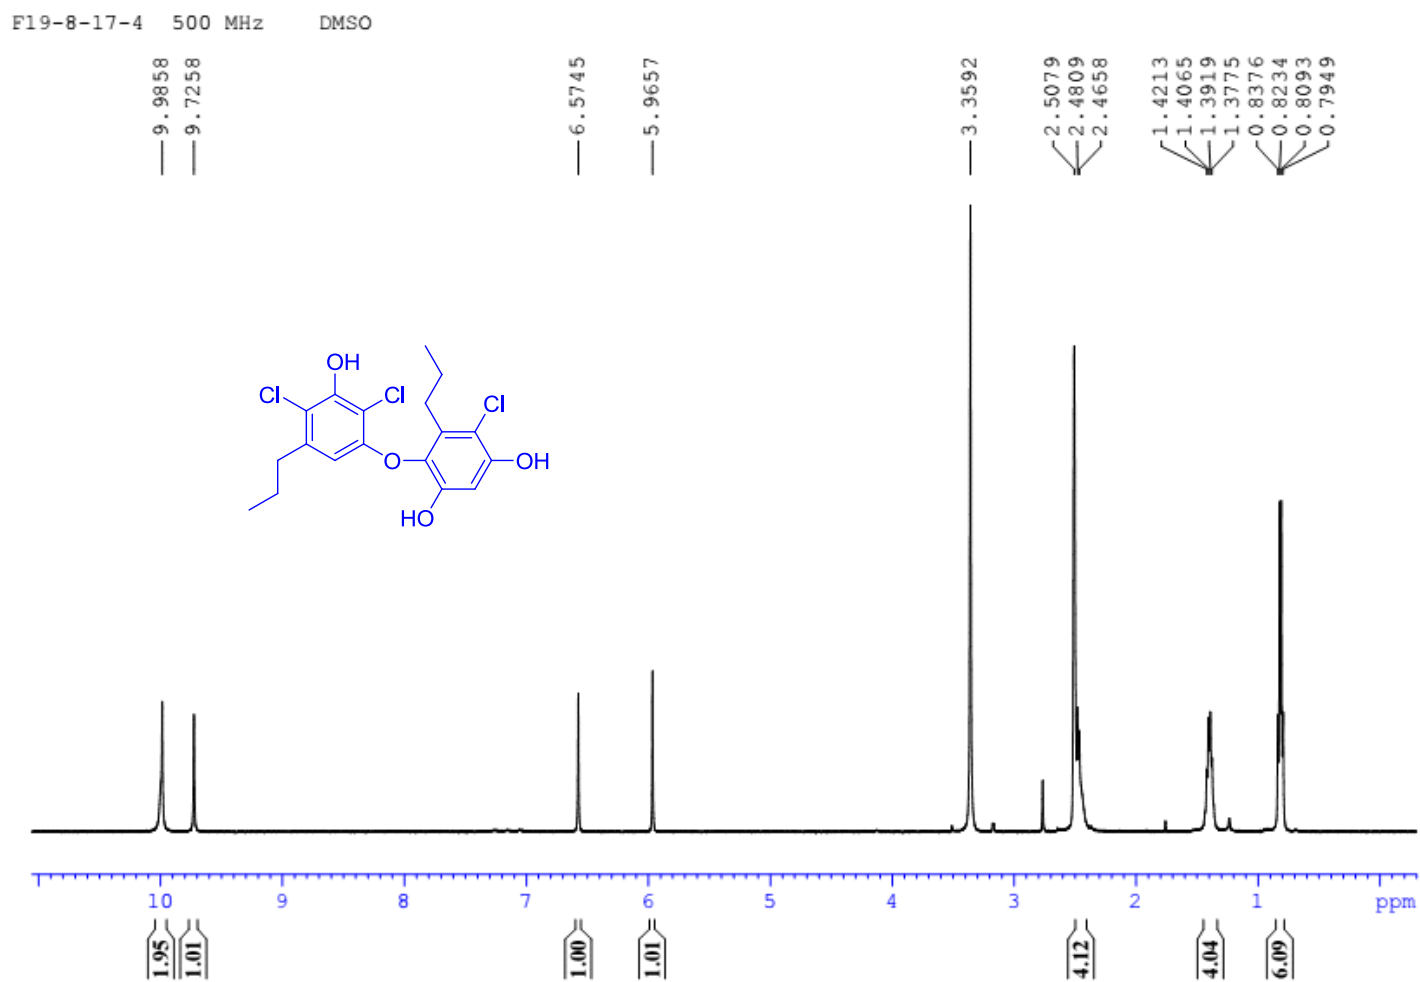

**Figure S3.**  $^1\text{H}$  NMR spectrum of compound **1** in DMSO- $d_6$  (500 MHz).

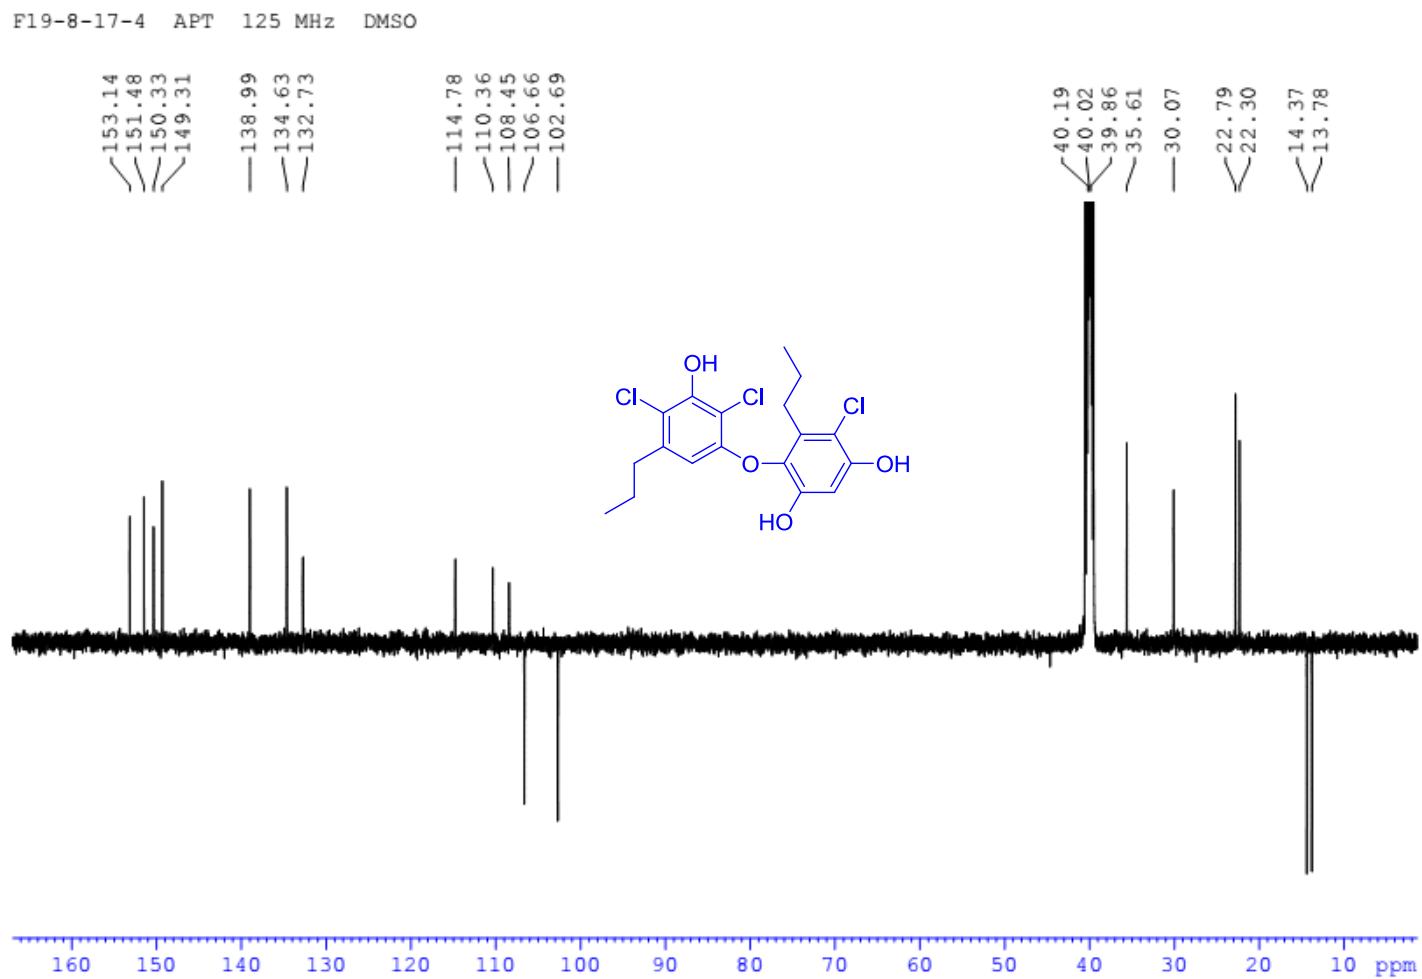

**Figure S4.**  $^{13}\text{C}$  NMR spectrum of compound **1** in DMSO- $d_6$  (125 MHz).

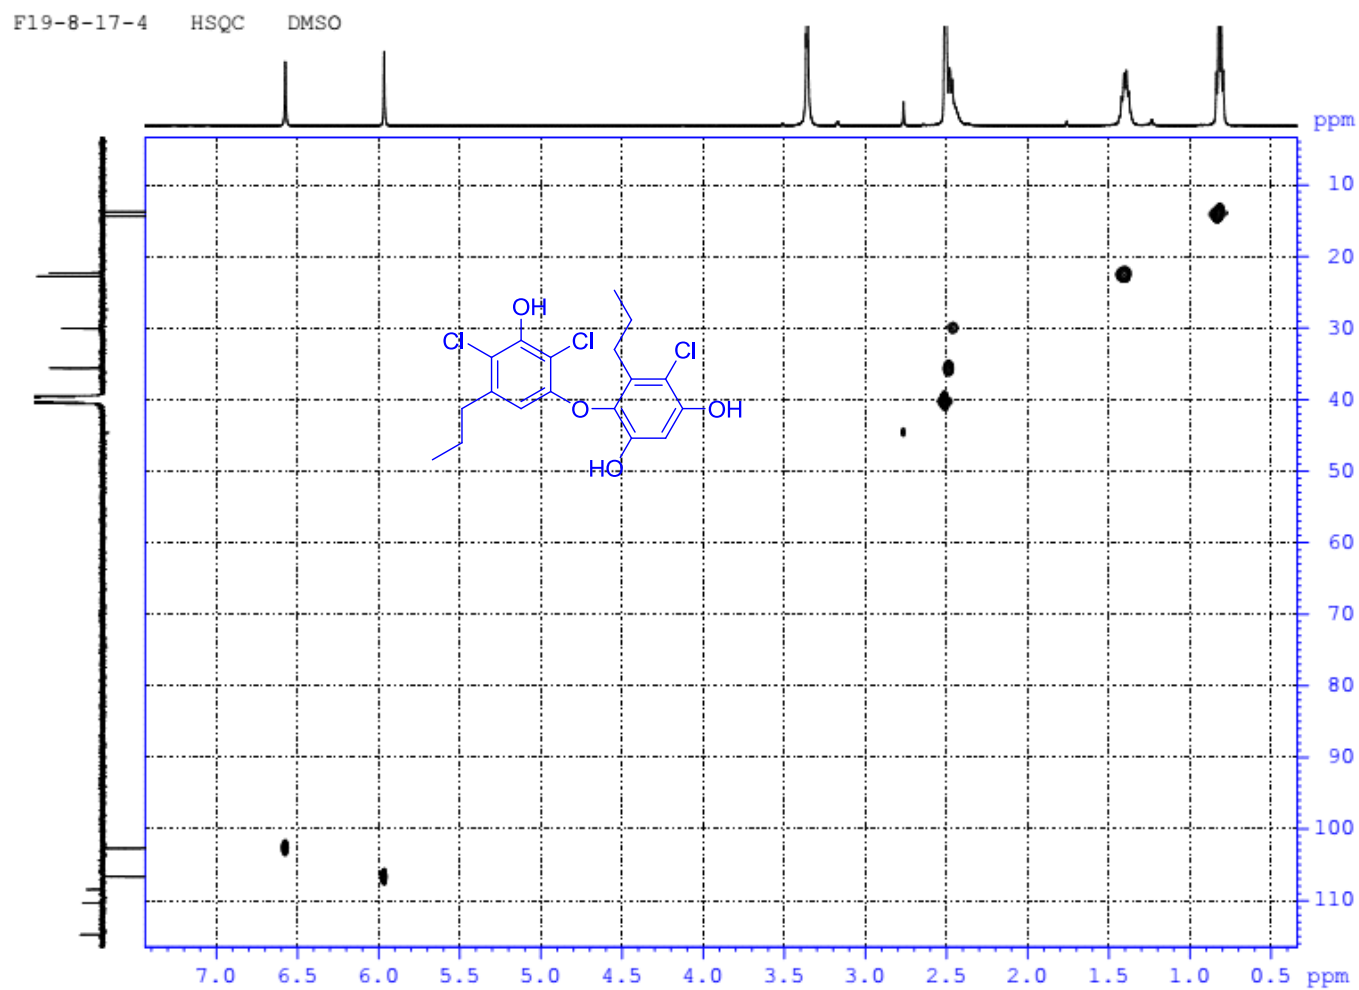

Figure S5. HSQC spectrum of compound 1 in DMSO-d6.

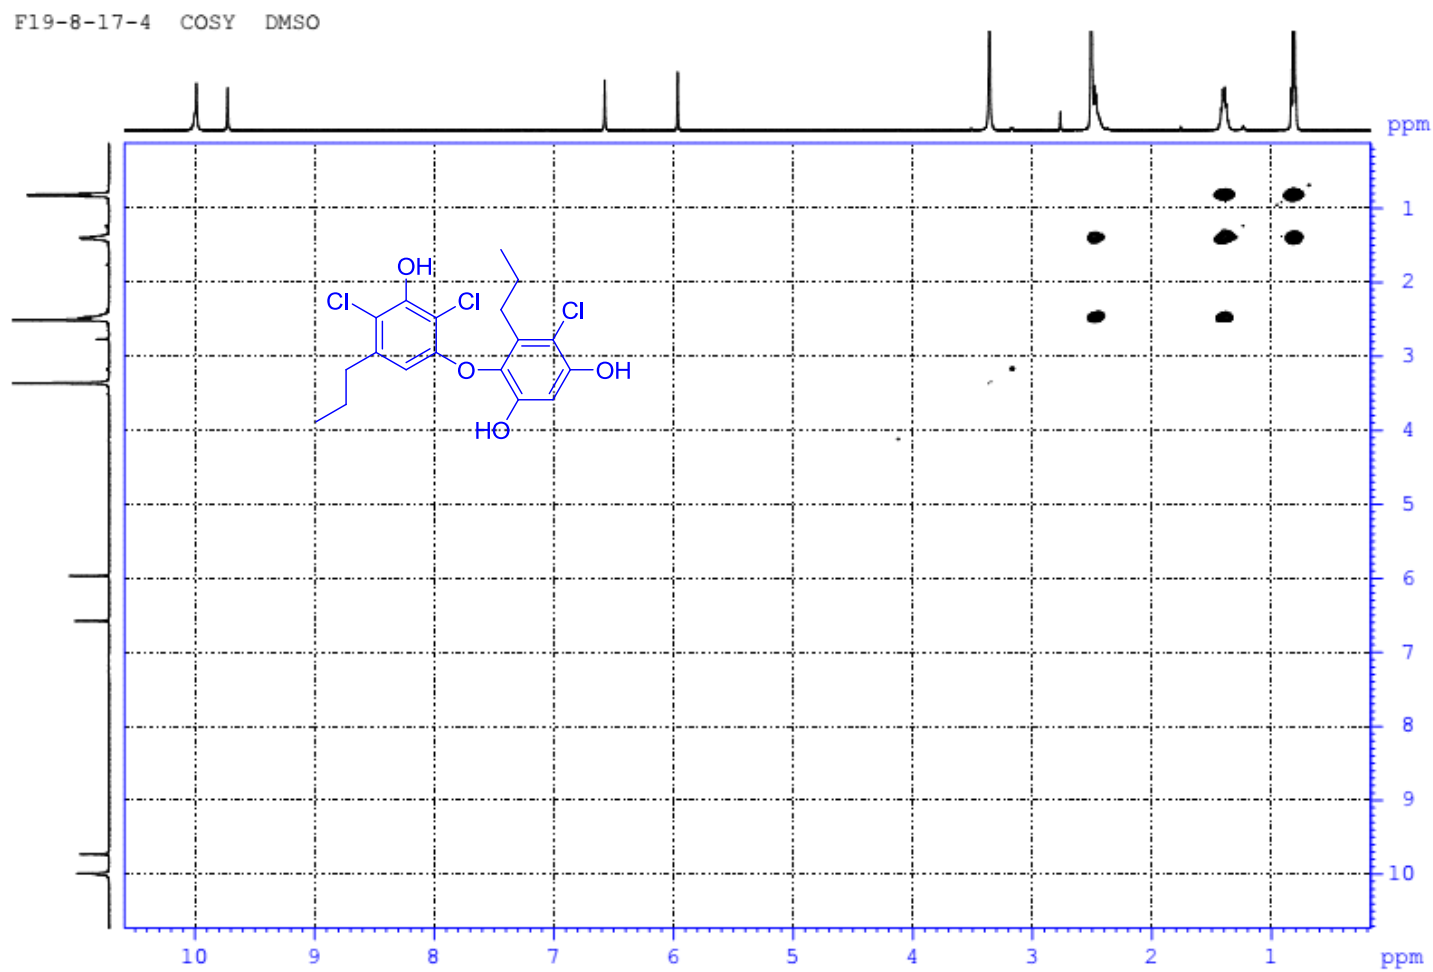

**Figure S6.**  $^1\text{H}$ - $^1\text{H}$  COSY spectrum of compound **1** in DMSO- $d_6$ .



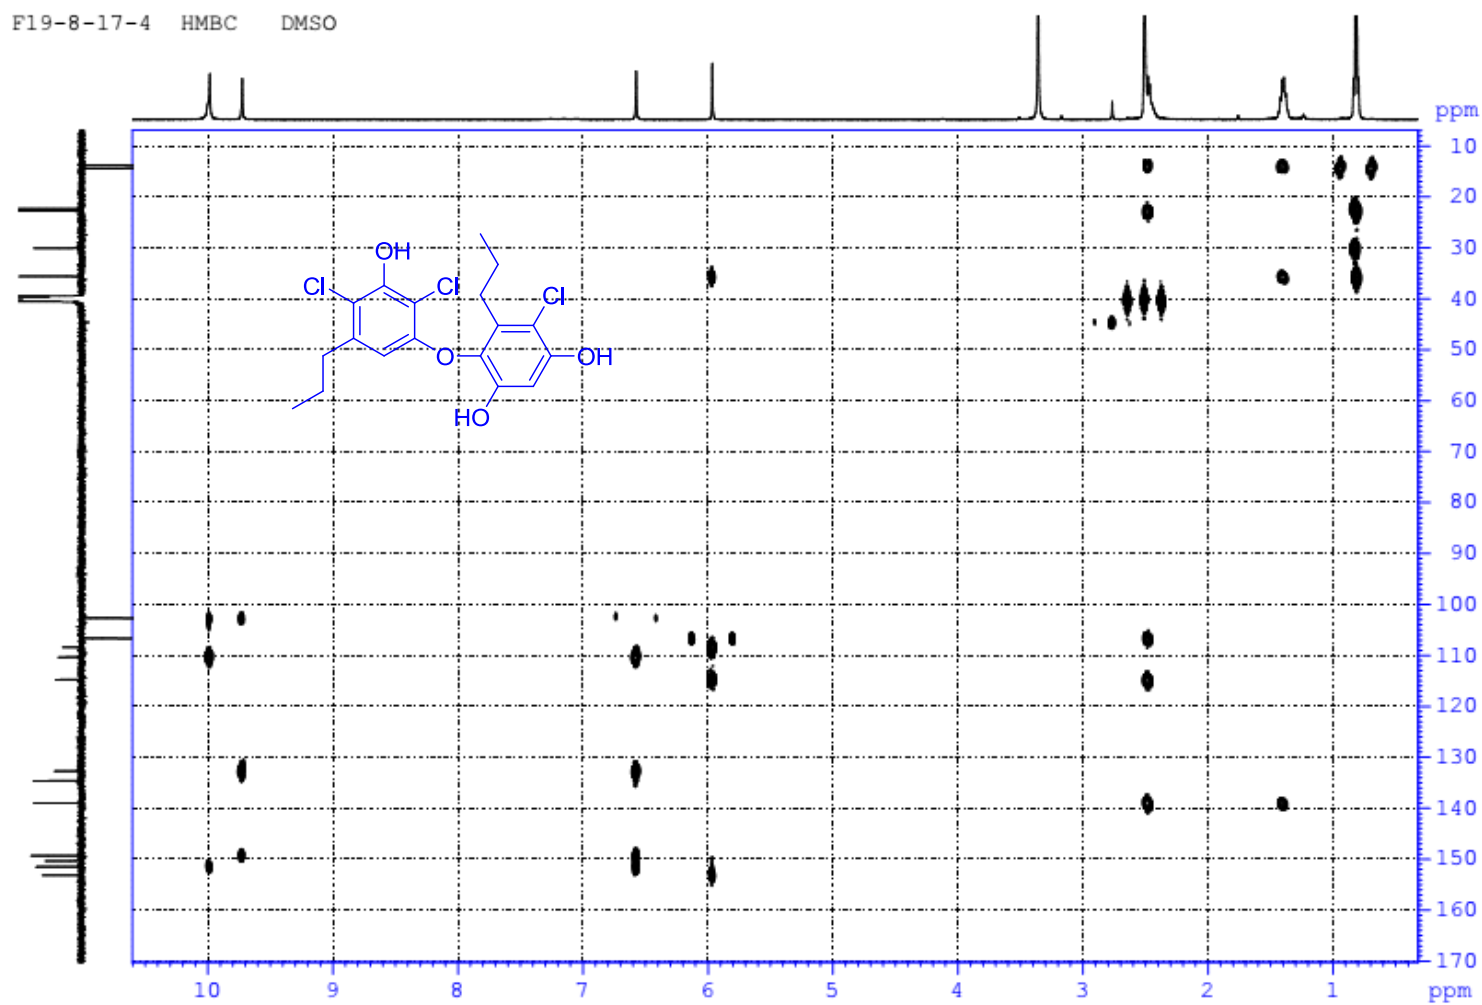

**Figure S7.** HMBC spectrum of compound **1** in DMSO-d<sub>6</sub>.

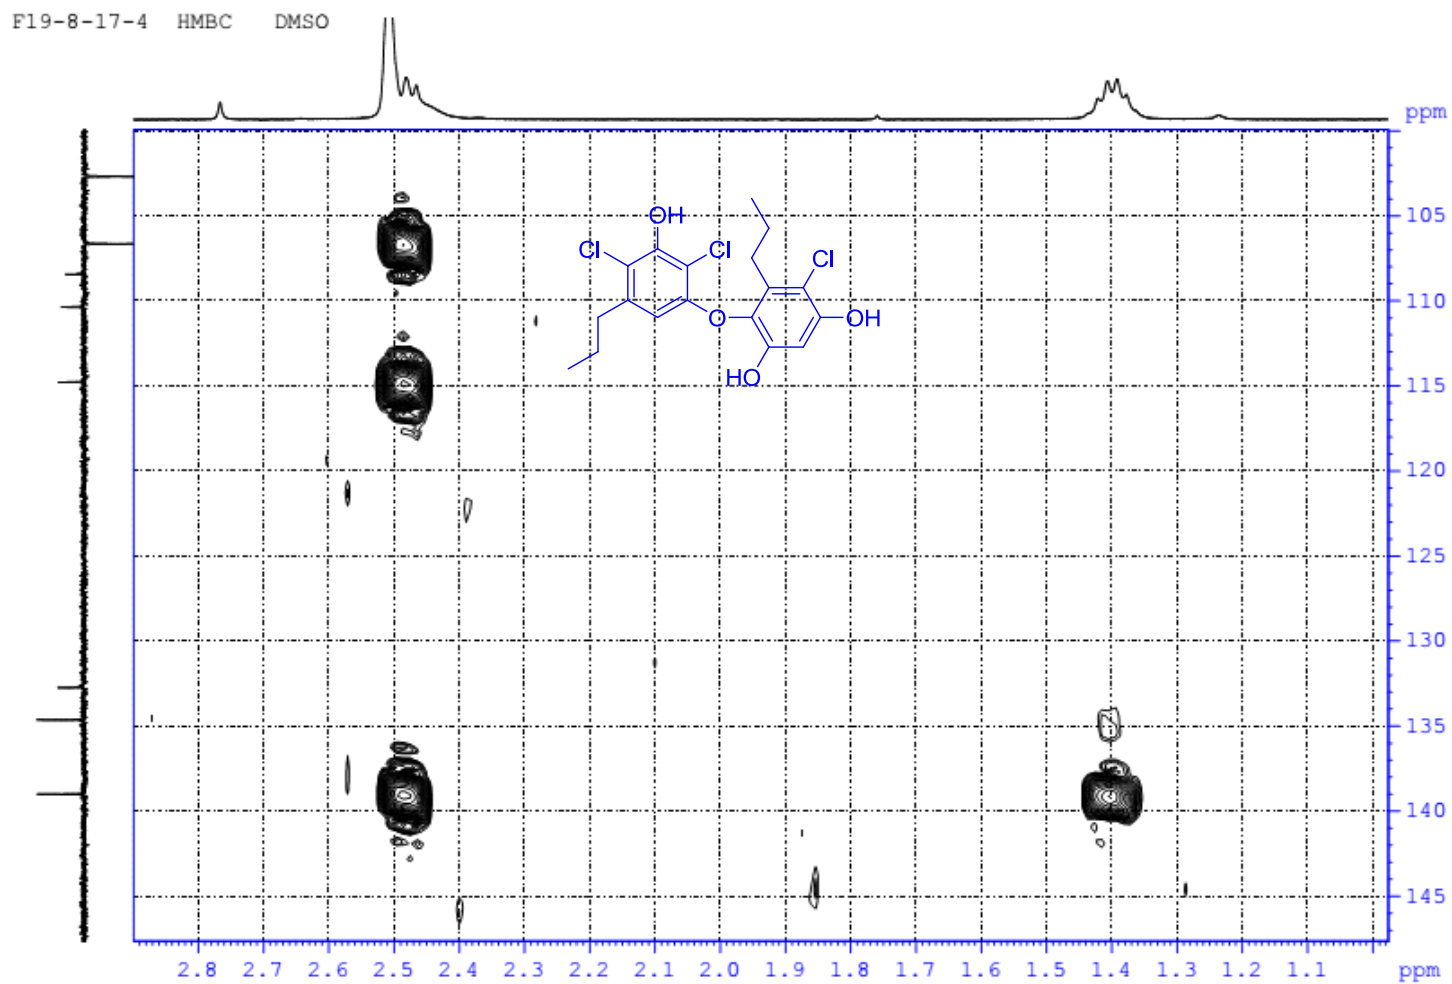

**Figure S7-1.** HMBC spectrum of compound **1** in DMSO-d<sub>6</sub> (part amplification).

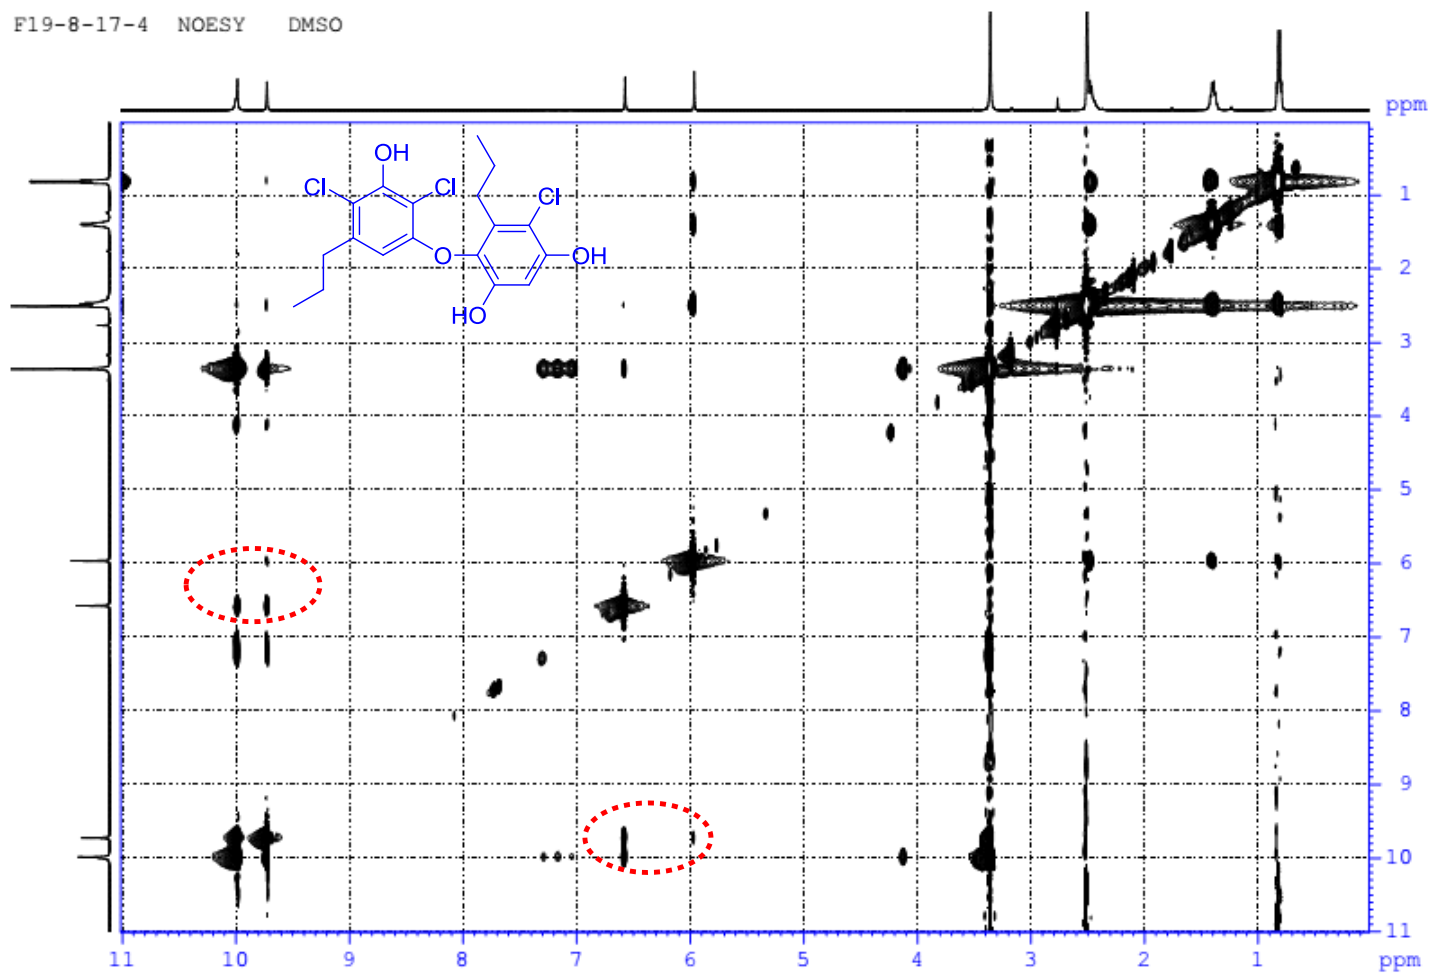

Figure S8. NOESY spectrum of compound 1 in DMSO-d6.

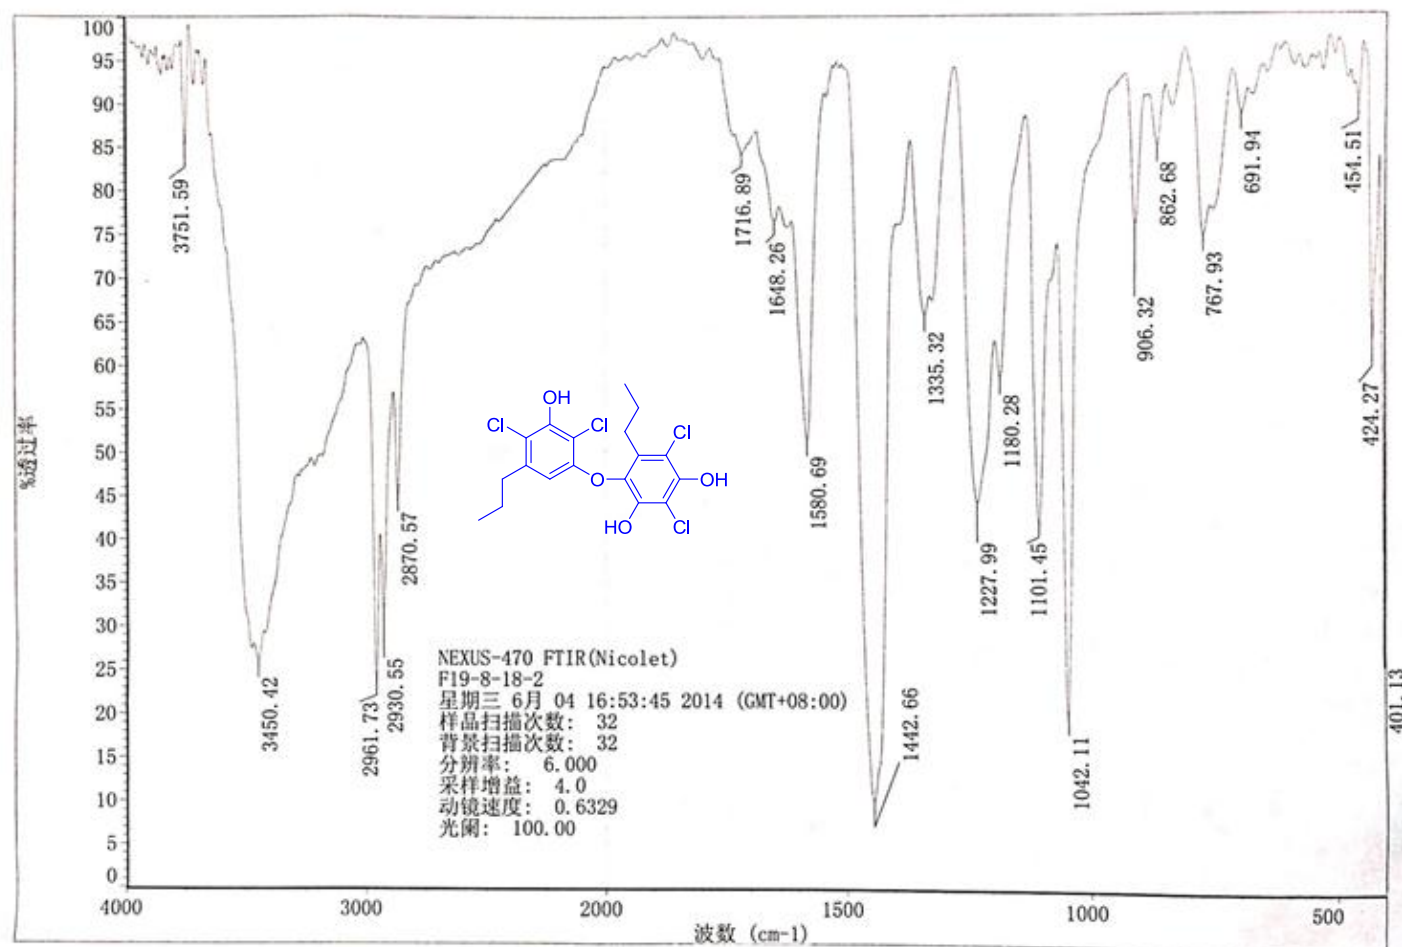

Figure S9. IR spectrum of compound 2.

Xevo G2 Q.TOF YCA166#

F198-18-210 (0.199) Cm (10.16-(27+2251))

07-Jul-2014

Waters

1: TOFMS ES-  
8.66e3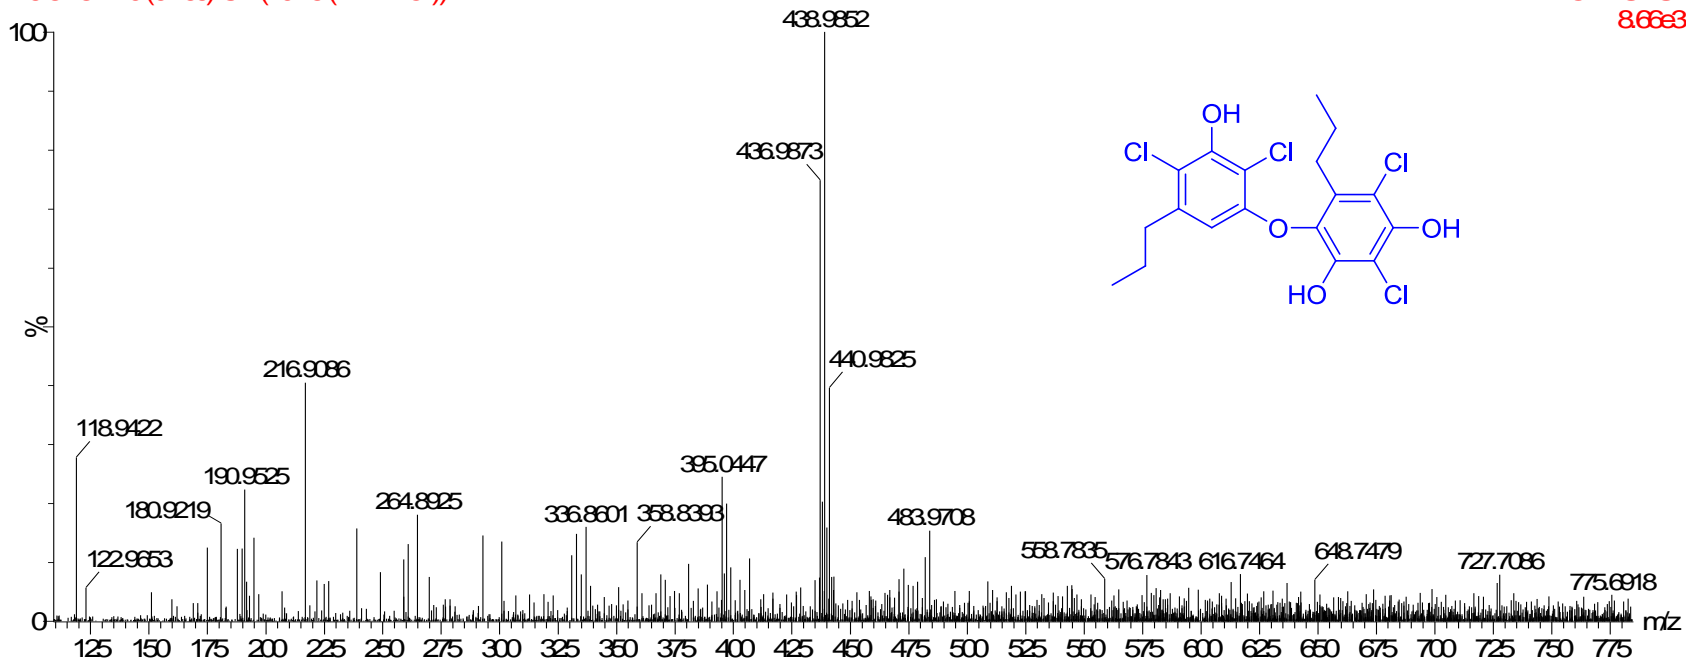**Figure S10.** Negative mode HRESIMS data of compound 2.

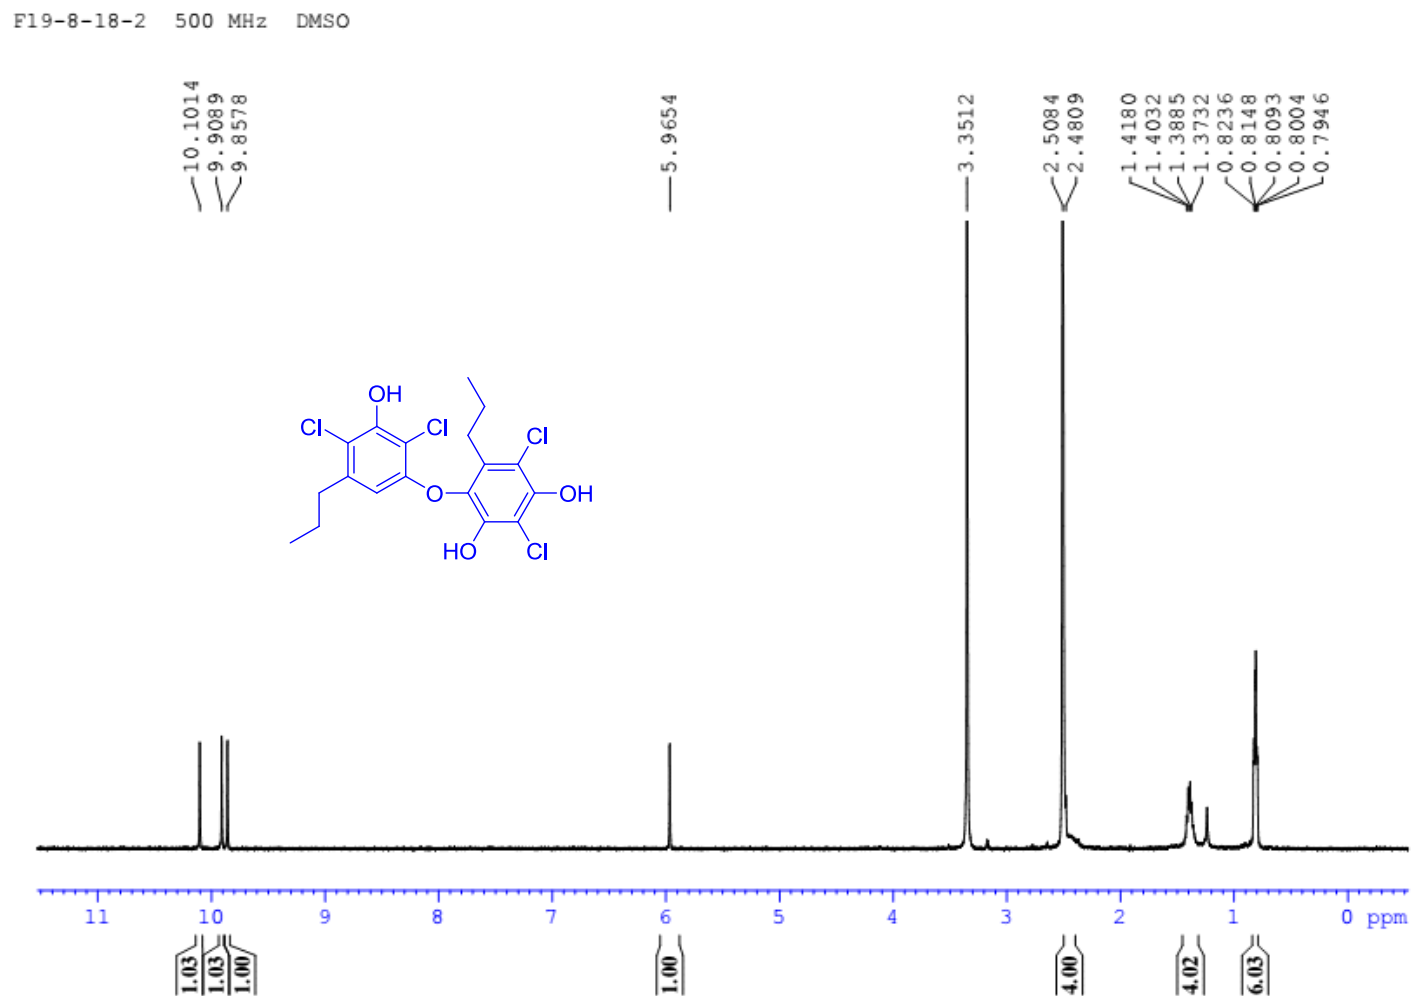

**Figure S11.** <sup>1</sup>H NMR spectrum of compound 2 in DMSO-d<sub>6</sub> (500 MHz).

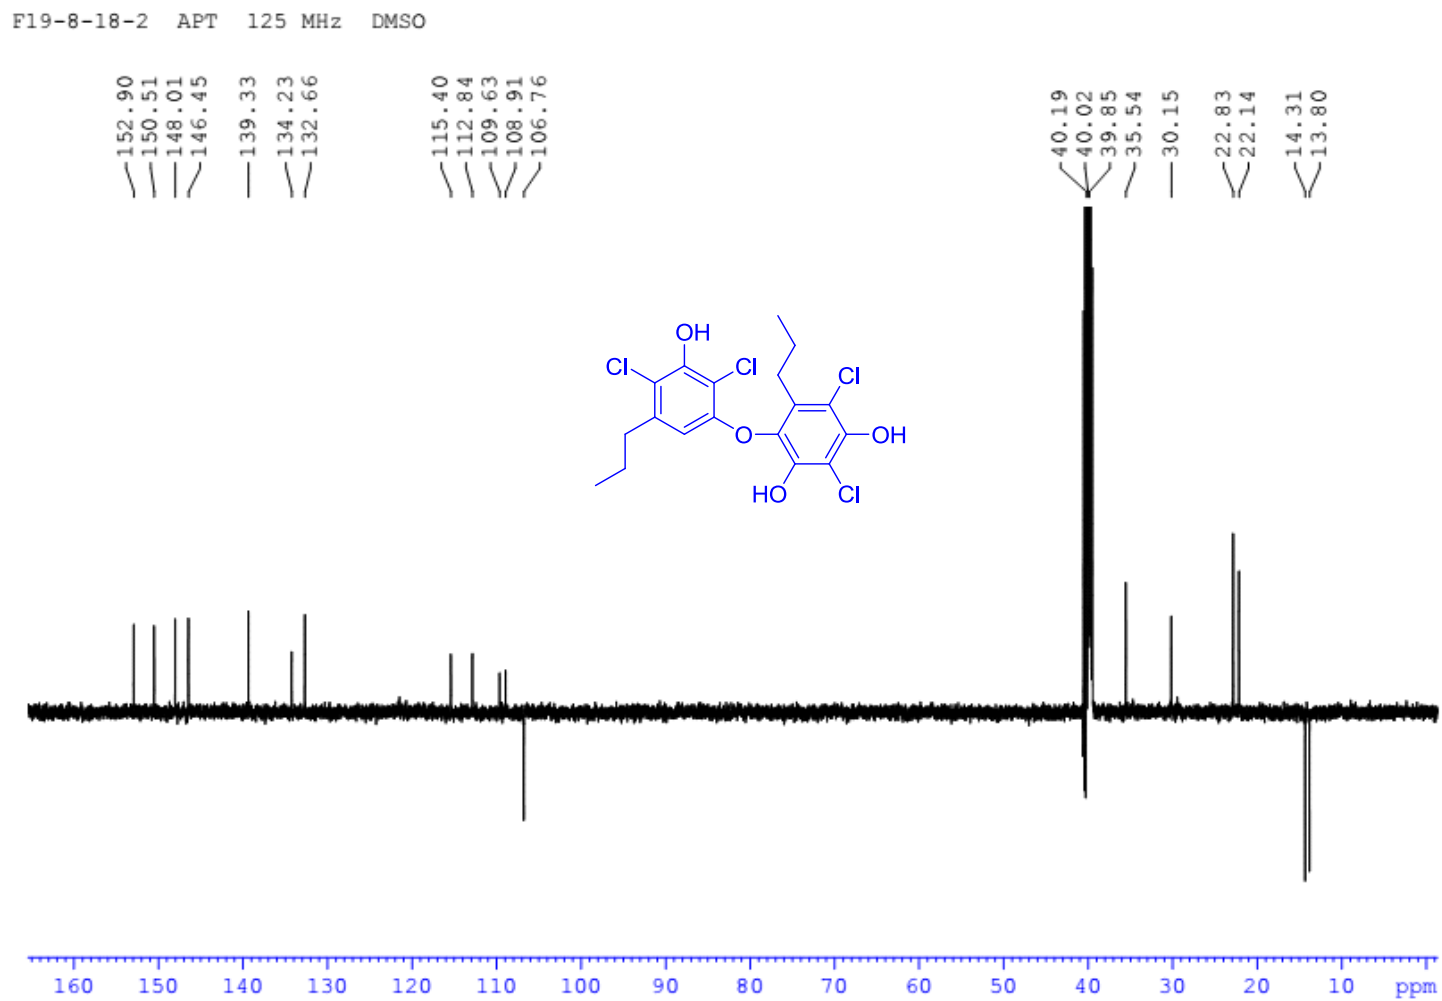

**Figure S12.**  $^{13}\text{C}$  NMR spectrum of compound **2** in DMSO- $d_6$  (125 MHz).

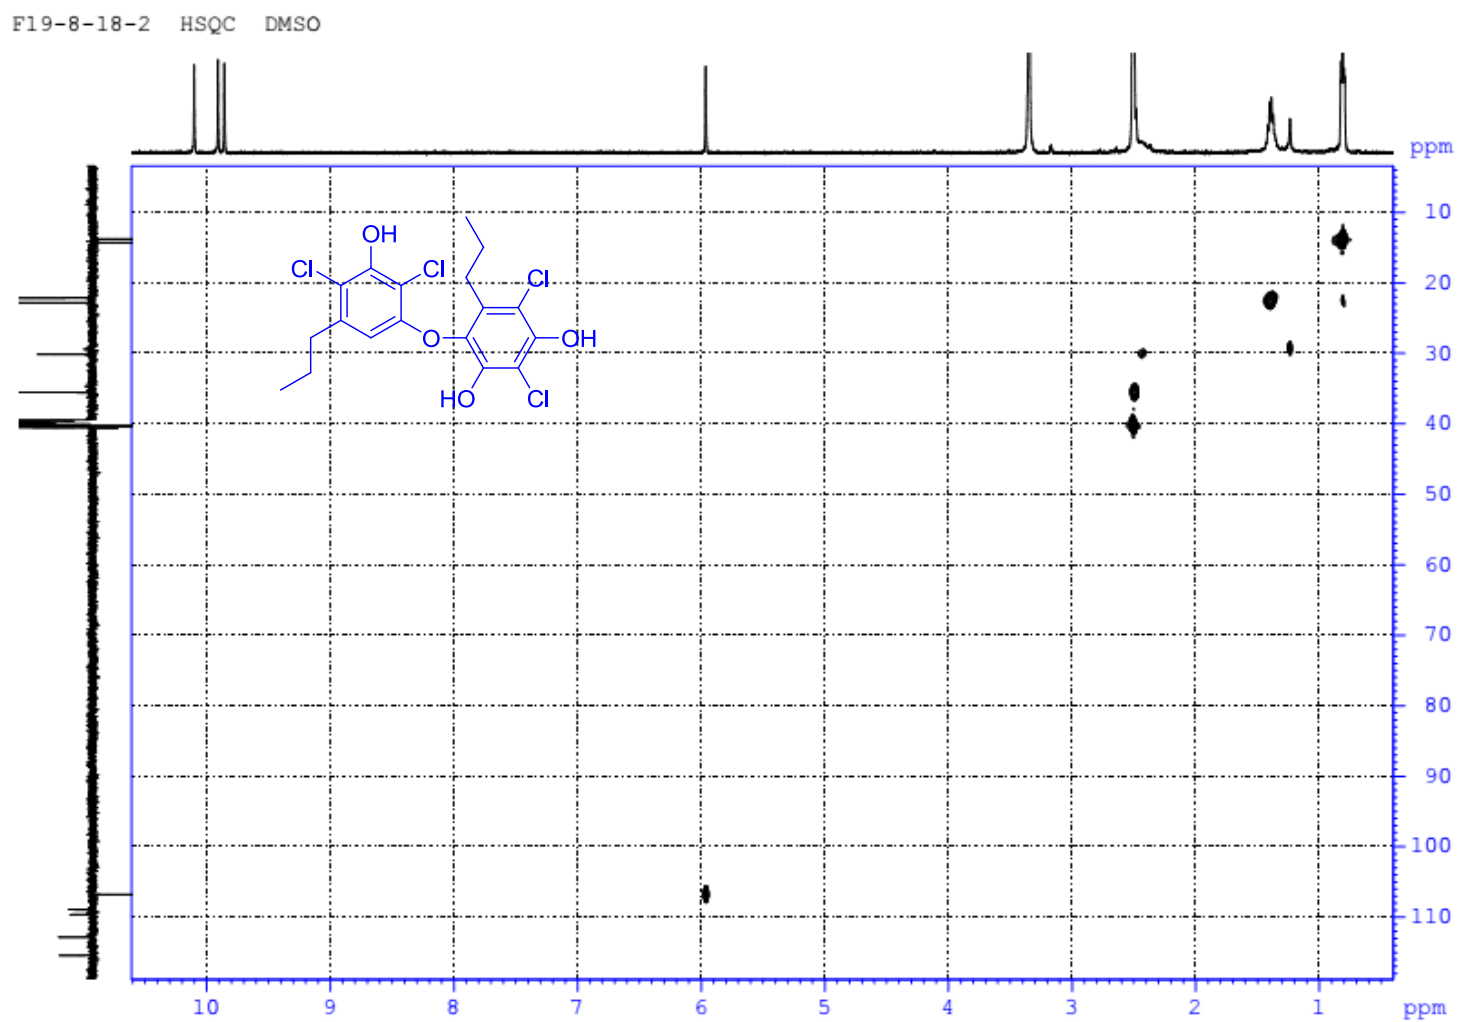

Figure S13. HSQC spectrum of compound 2 in DMSO-d<sub>6</sub>.



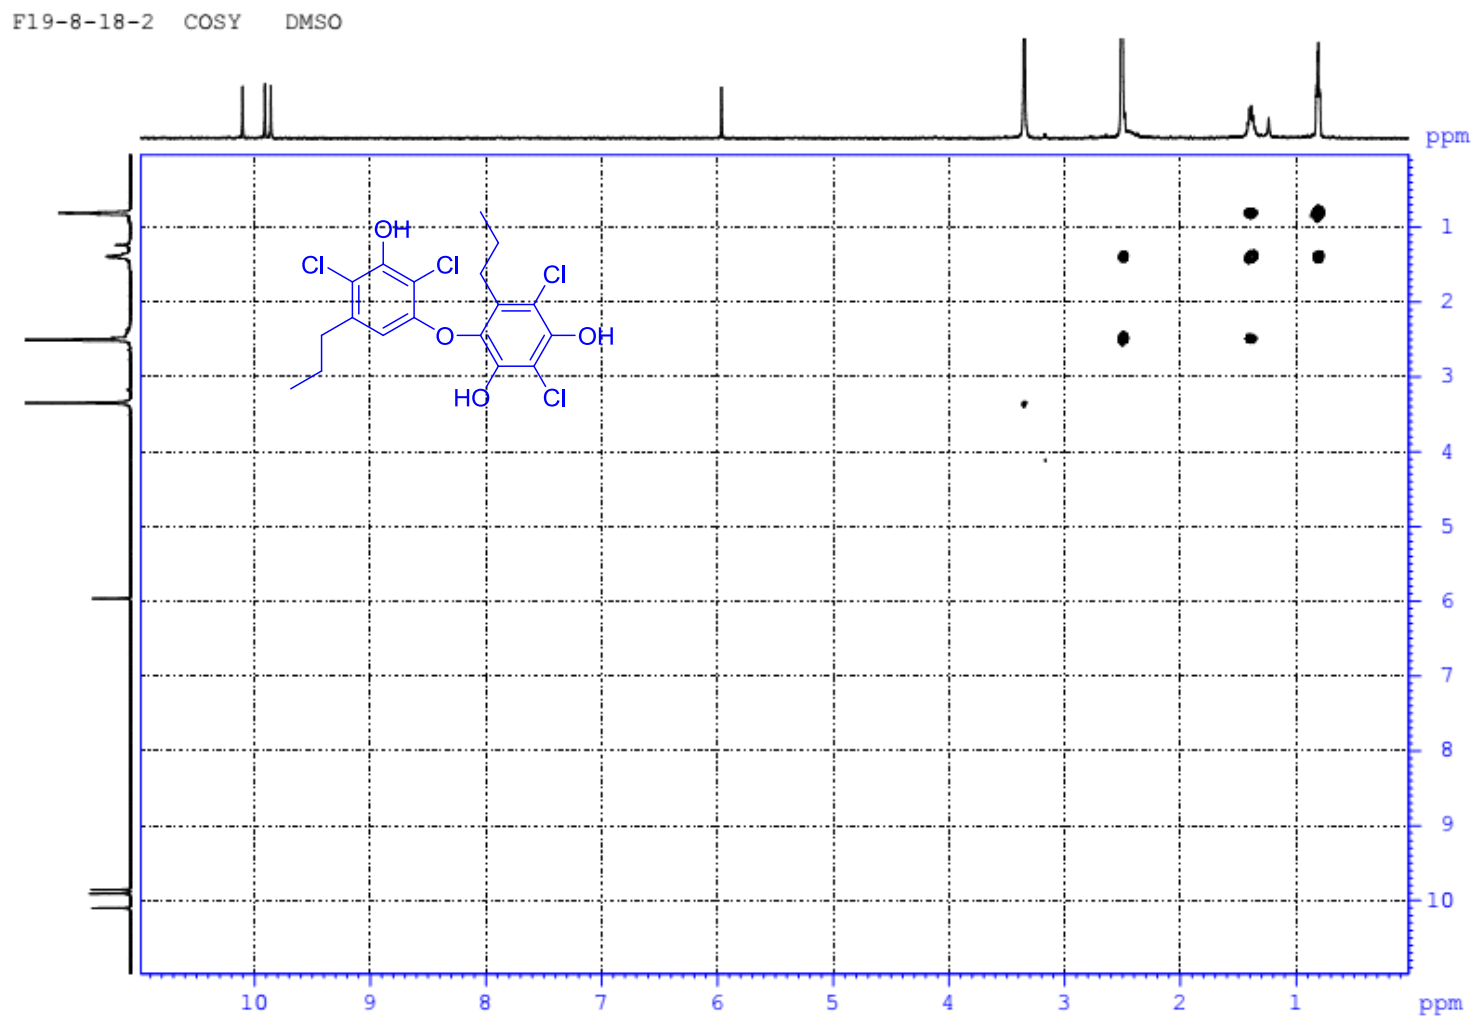

**Figure S14.**  $^1\text{H}$ - $^1\text{H}$  COSY spectrum of compound **2** in DMSO- $d_6$ .

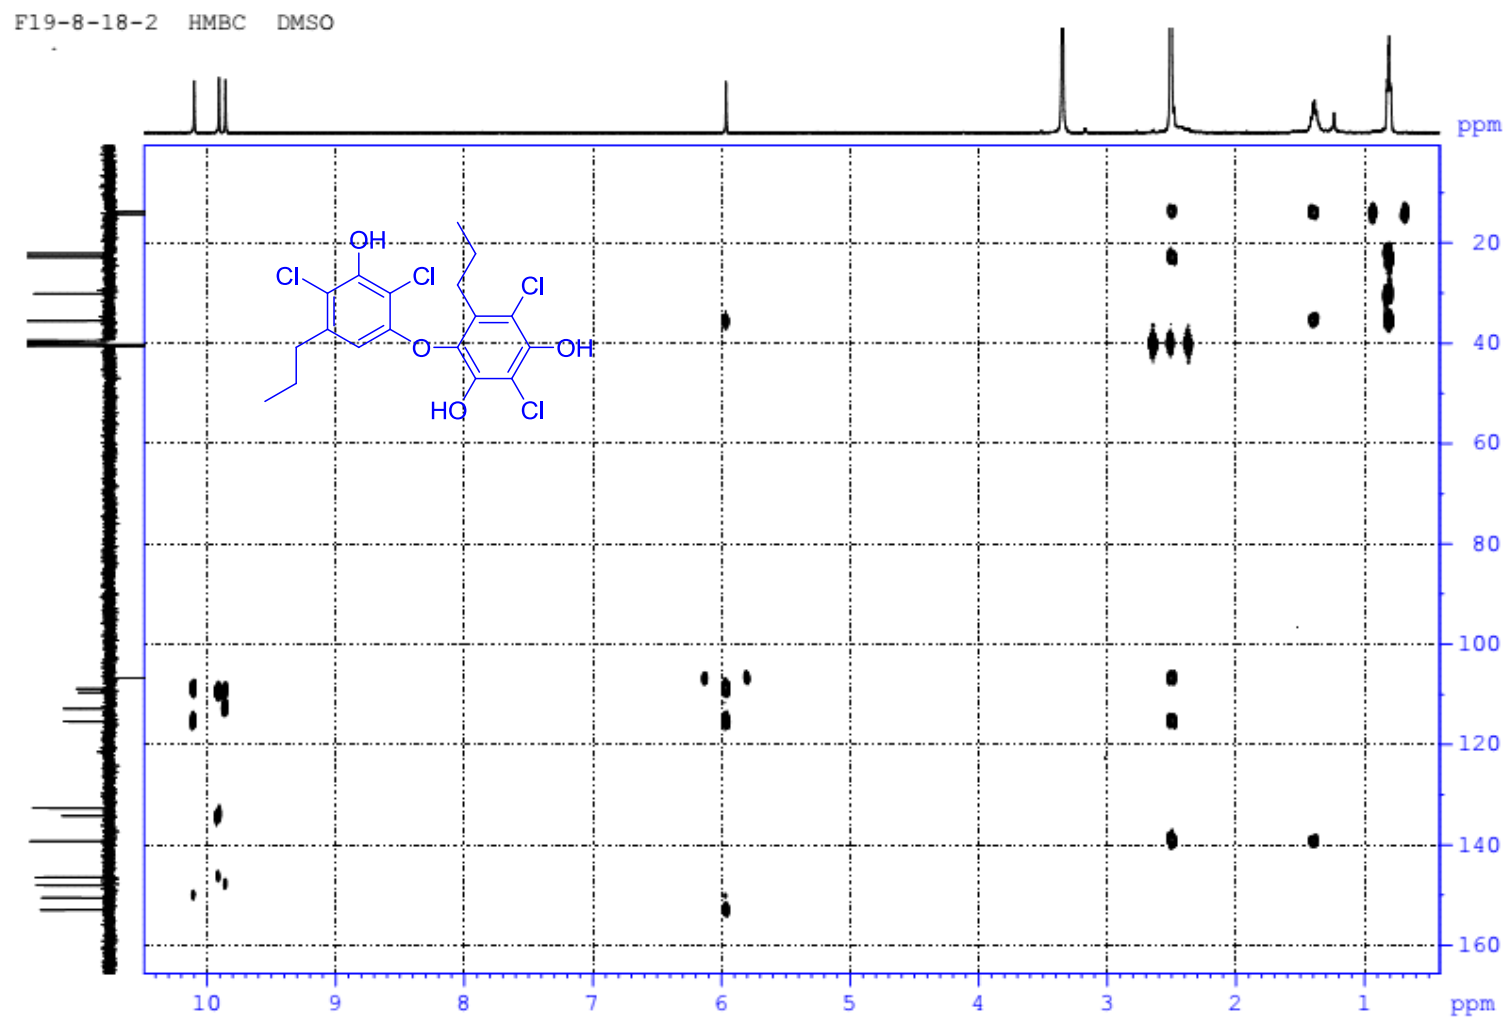

Figure S15. HMBC spectrum of compound 2 in DMSO-d<sub>6</sub>.

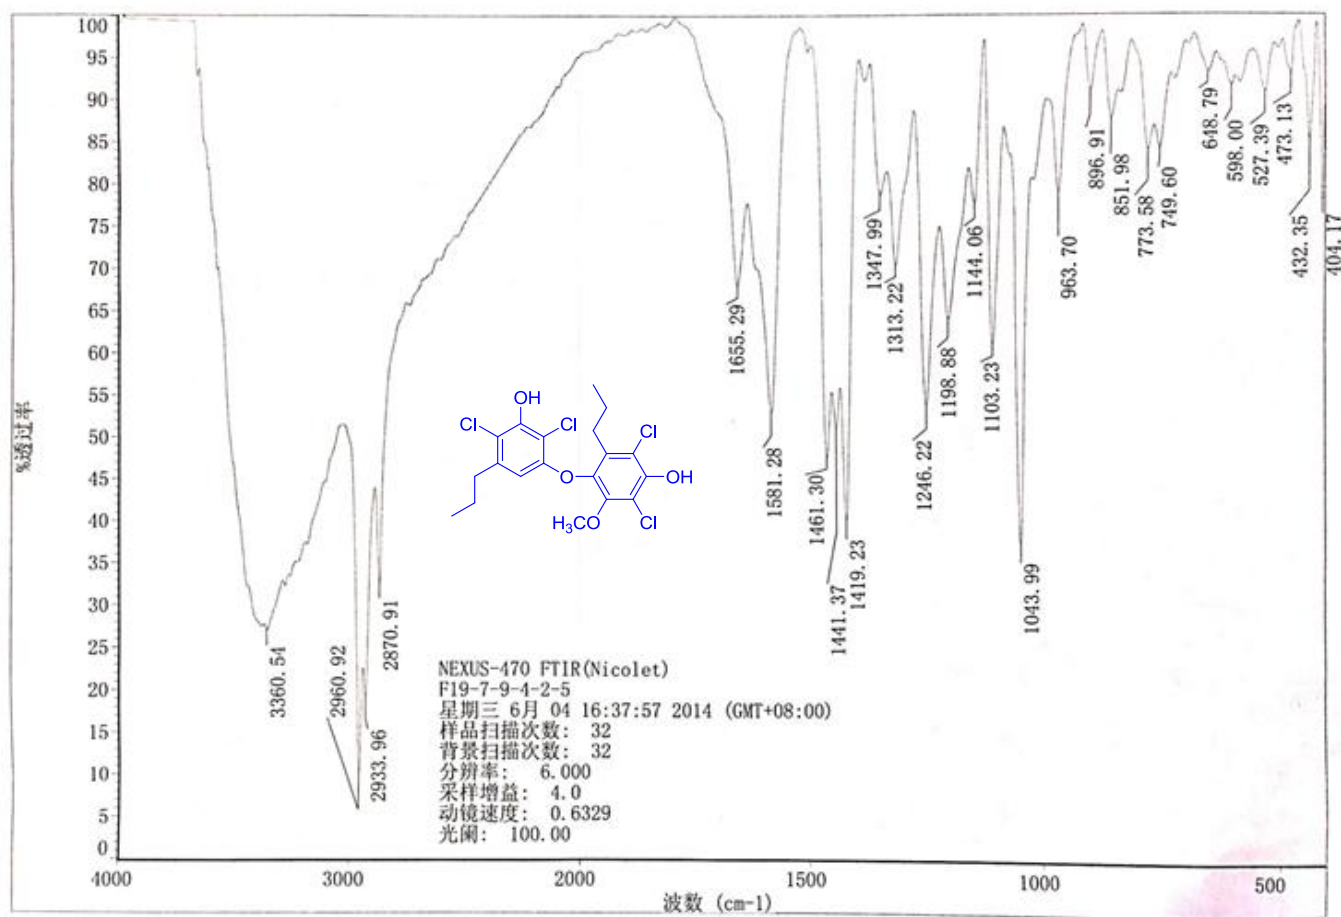

Figure S16. IR spectrum of compound 3.

Xevo G2 Q-TOF/CA166#

07-Jul-2014

Waters

F19-7-94+25 10(0.199) Cm(10:15-(36+23:52))

1: TOFMS ES-  
8.01e3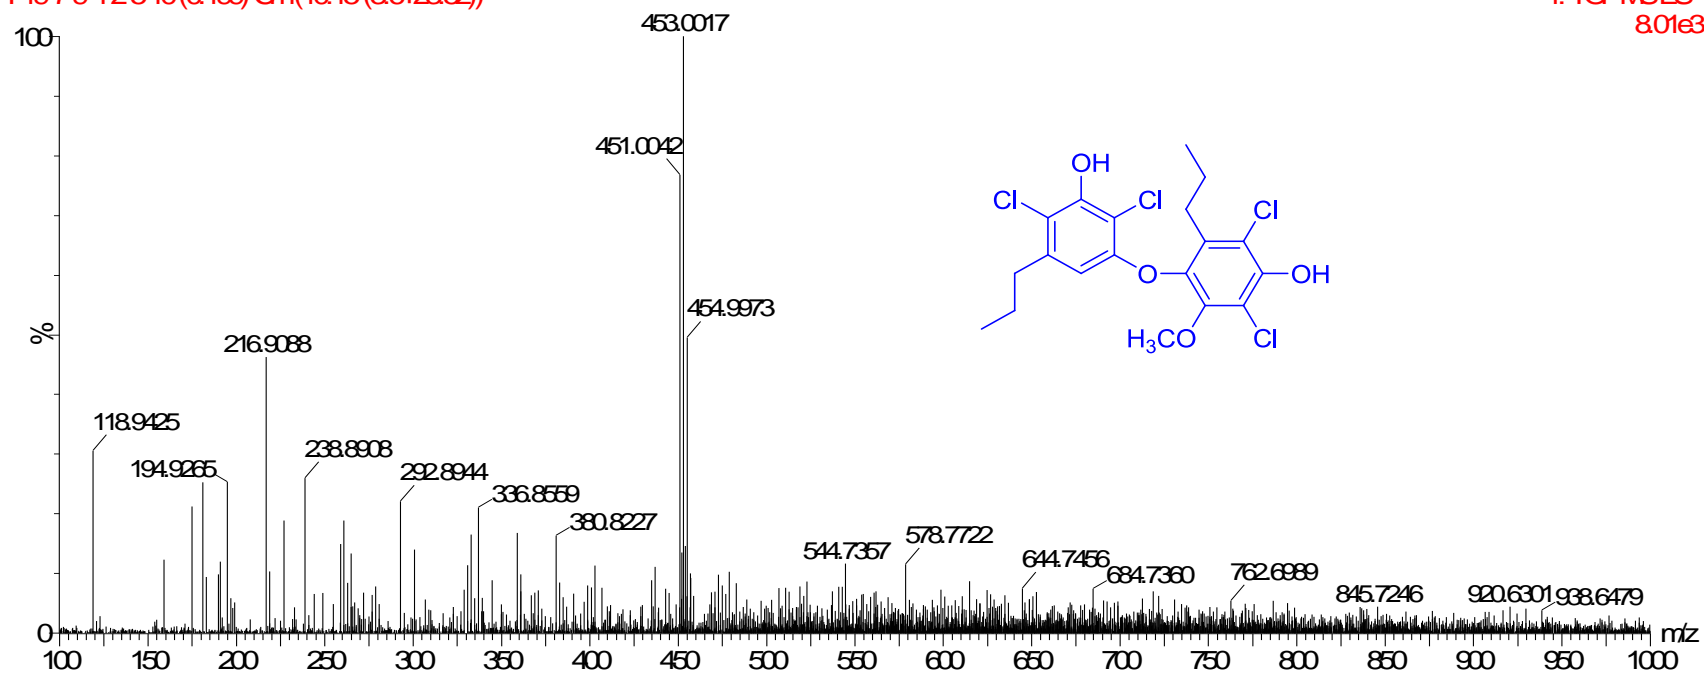

Figure S17. Negative mode HRESIMS data of compound 3.

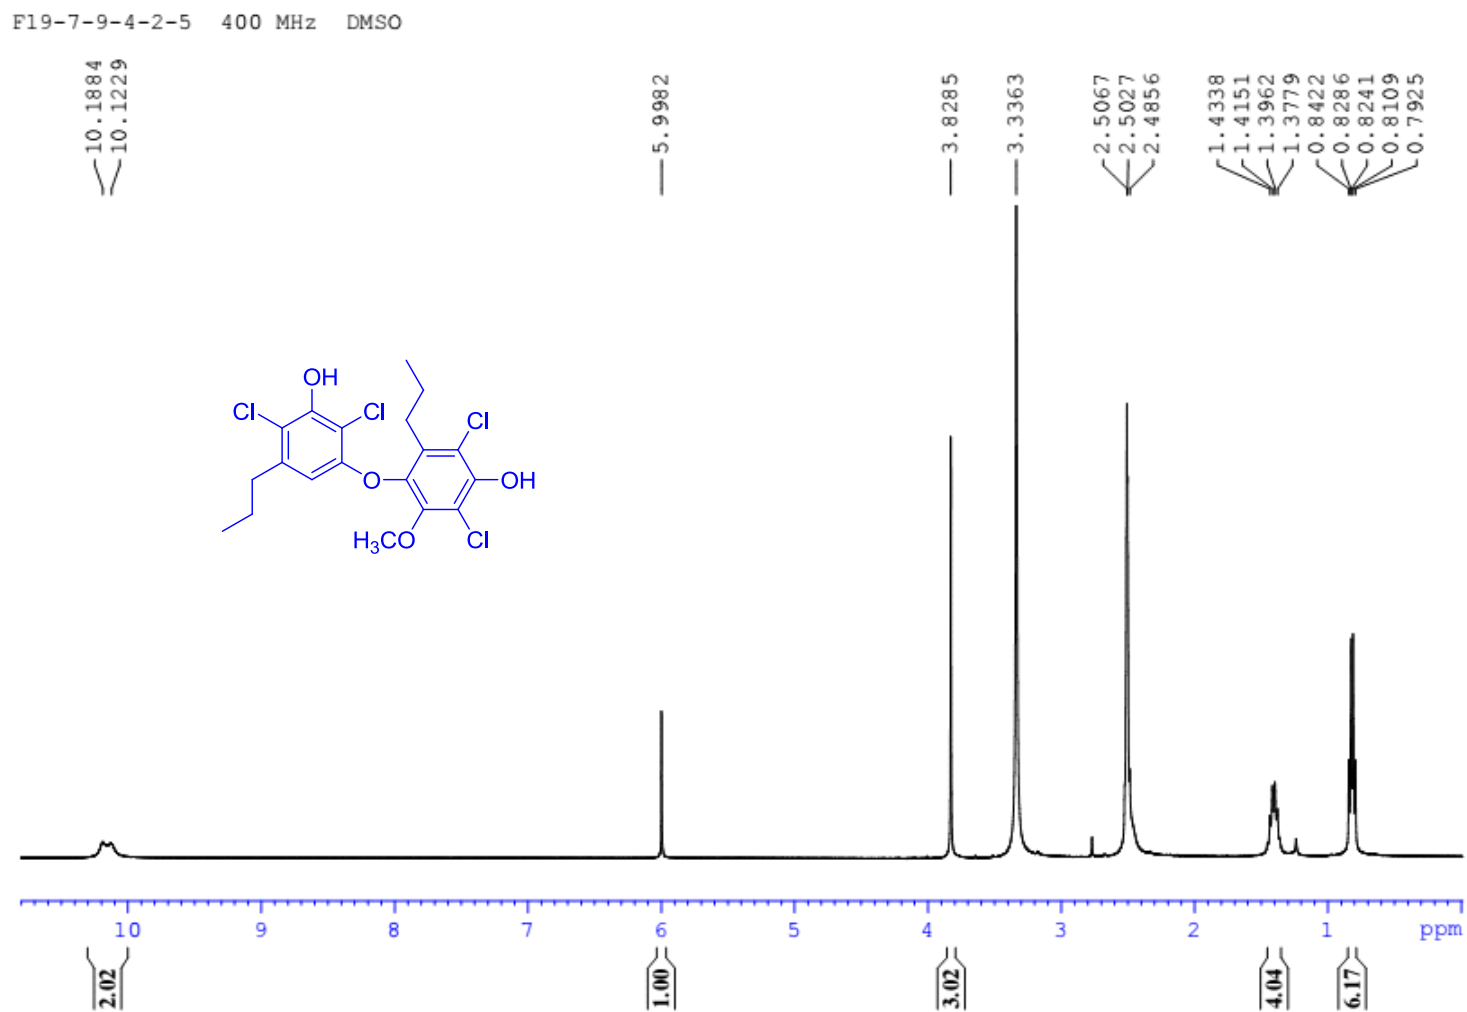

**Figure S18.**  $^1\text{H}$  NMR spectrum of compound **3** in DMSO- $d_6$  (400 MHz).

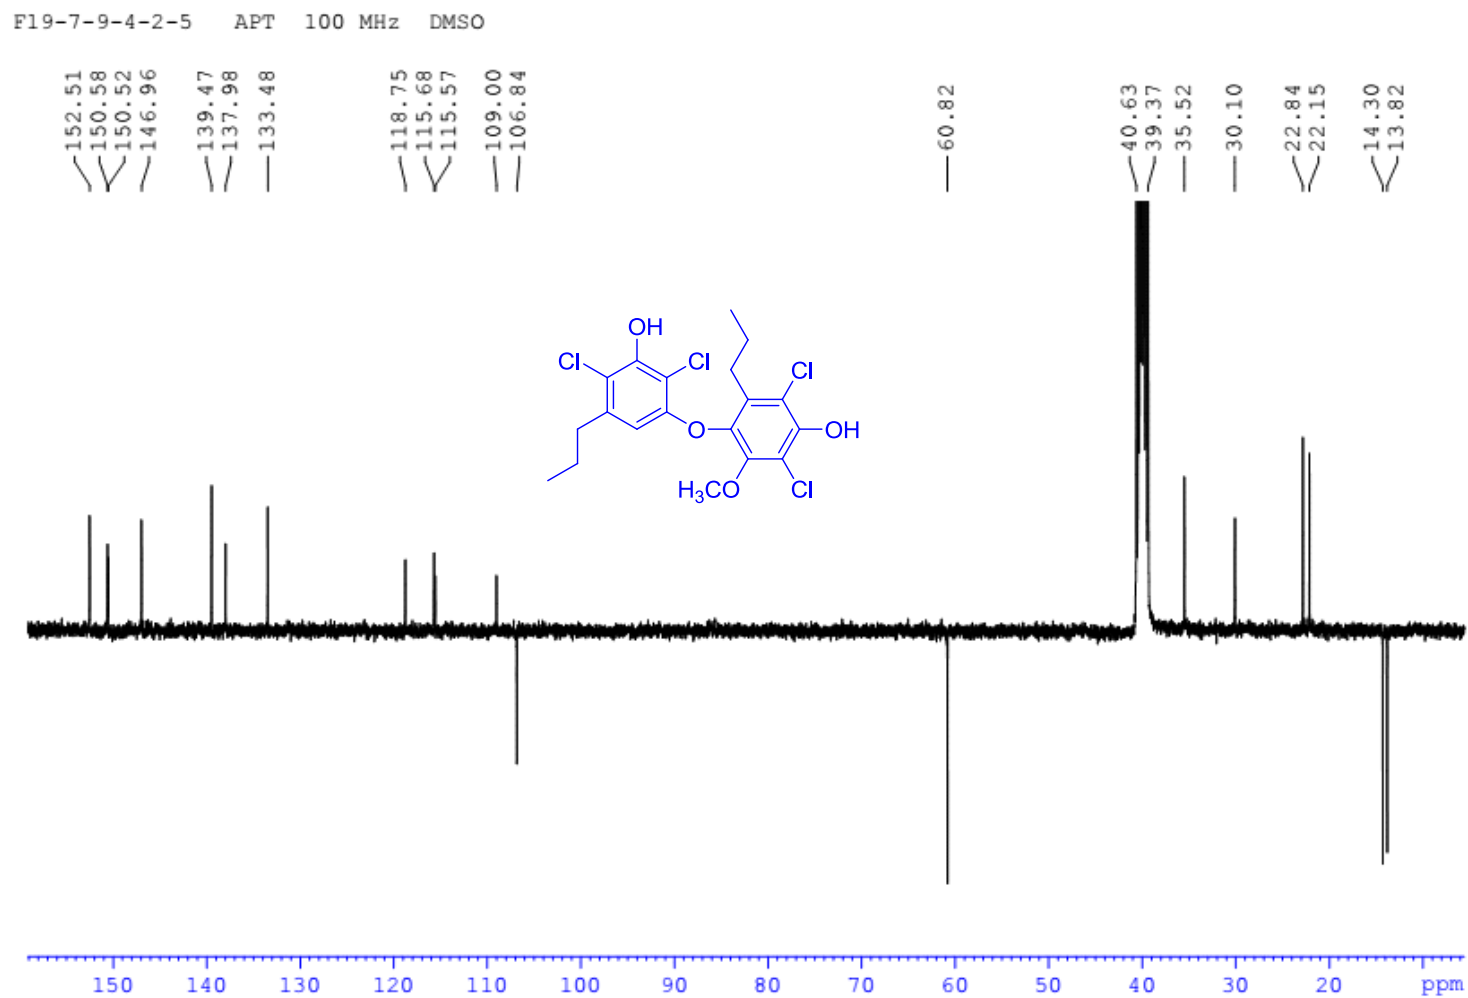

**Figure S19.**  $^{13}\text{C}$  NMR spectrum of compound **3** in DMSO- $d_6$  (100 MHz).

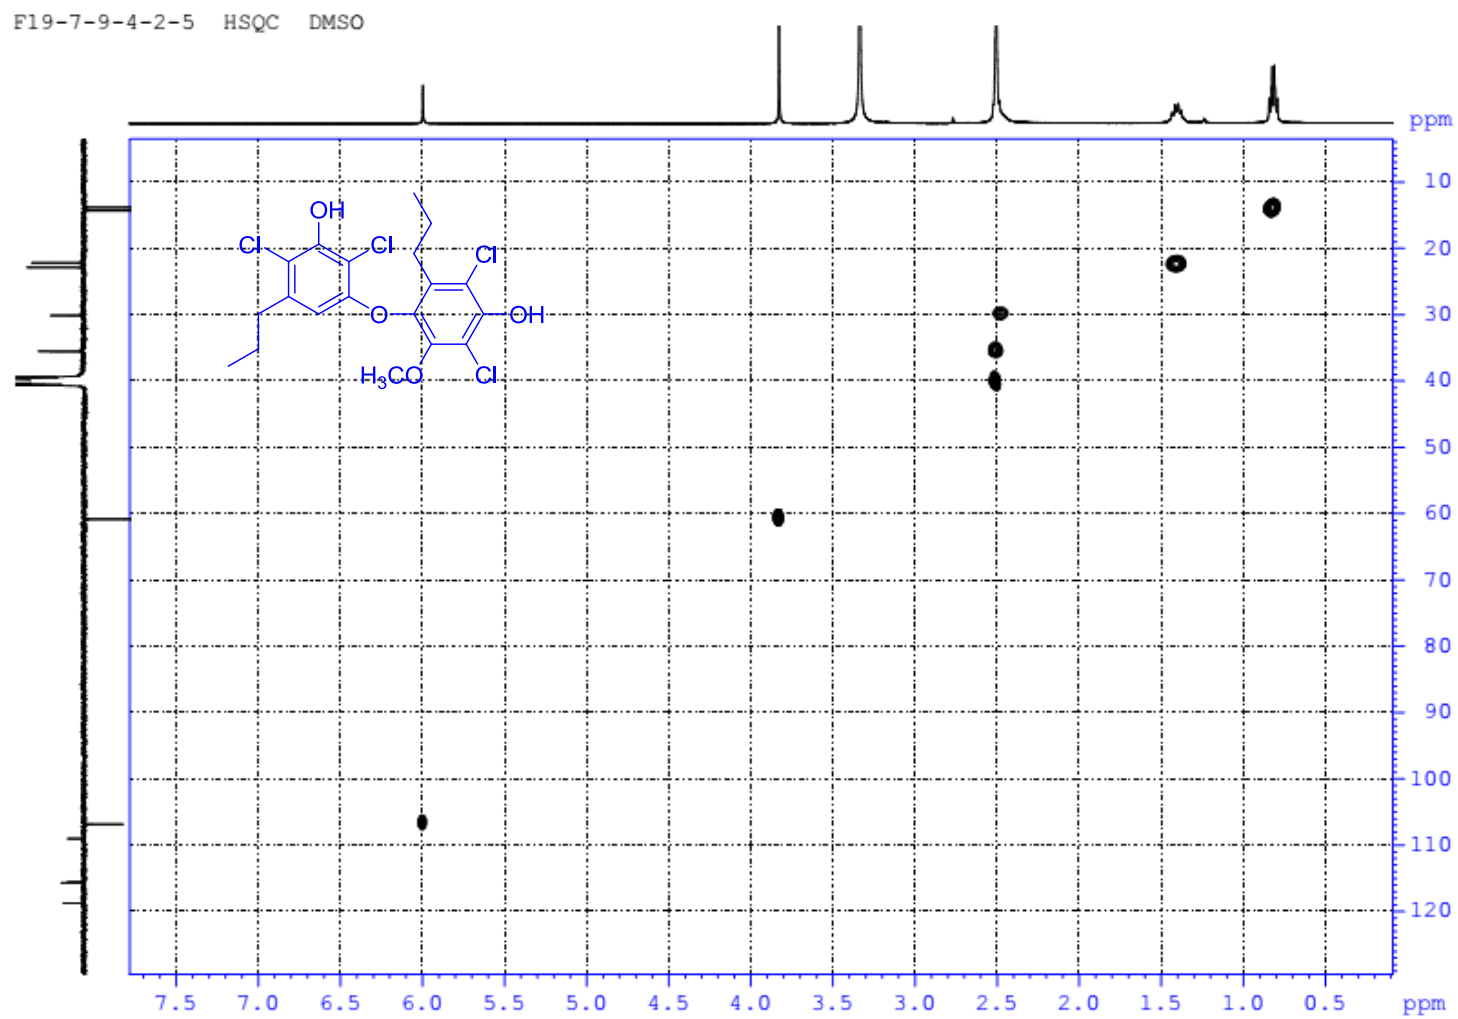

Figure S20. HSQC spectrum of compound 3 in DMSO-d6.

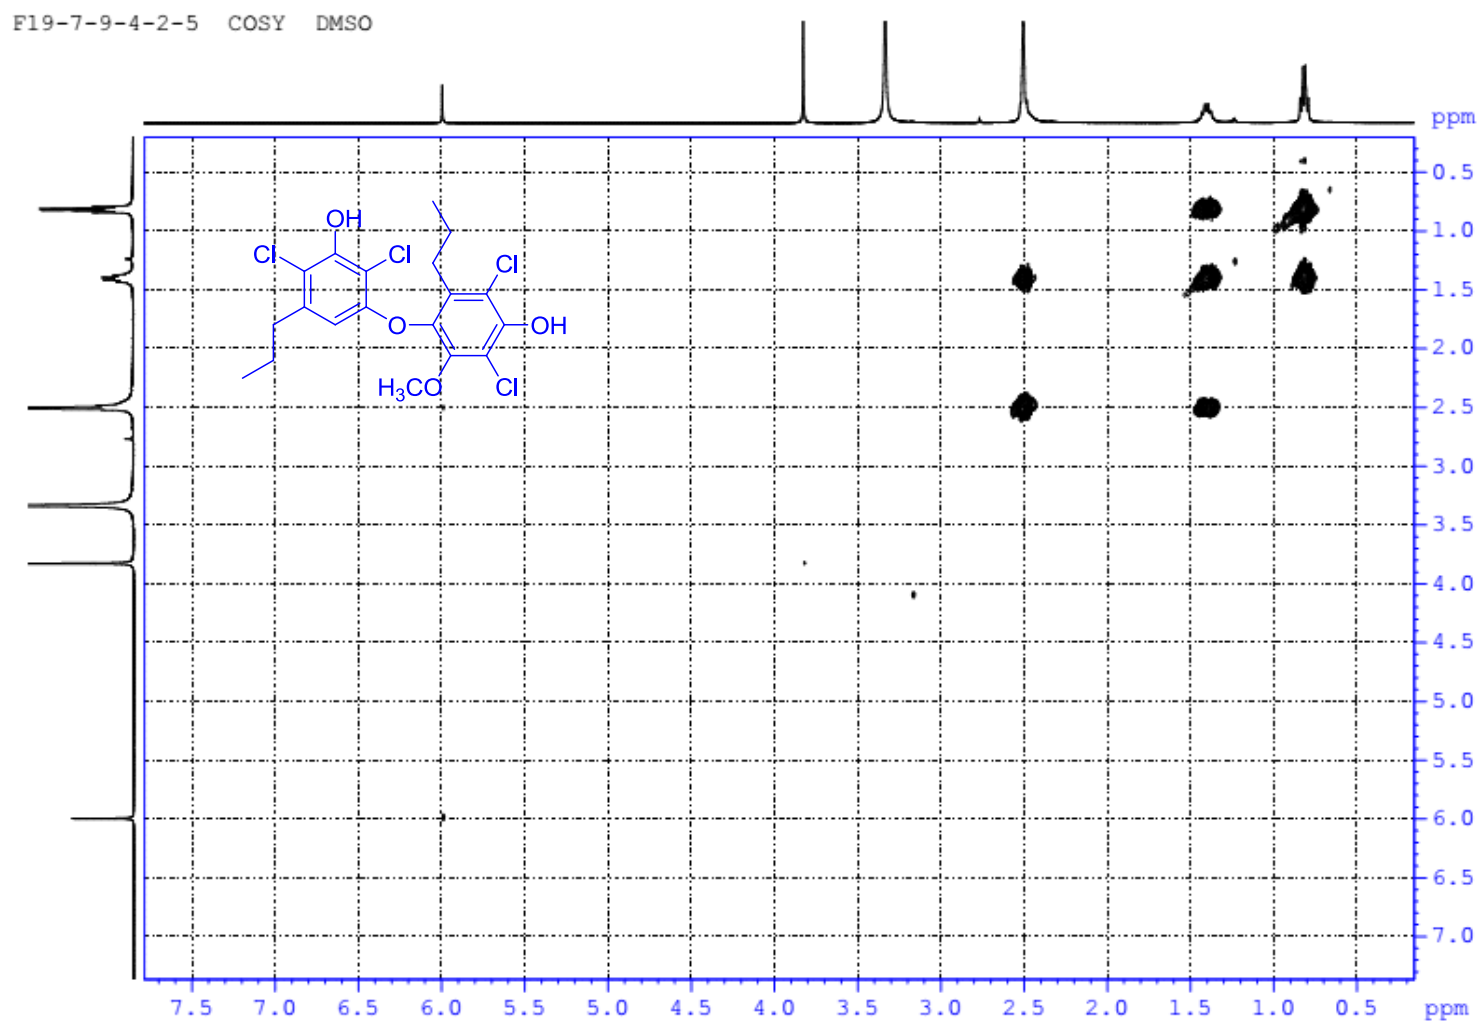

Figure S21.  $^1\text{H}$ - $^1\text{H}$  COSY spectrum of compound 3 in DMSO-d<sub>6</sub>.



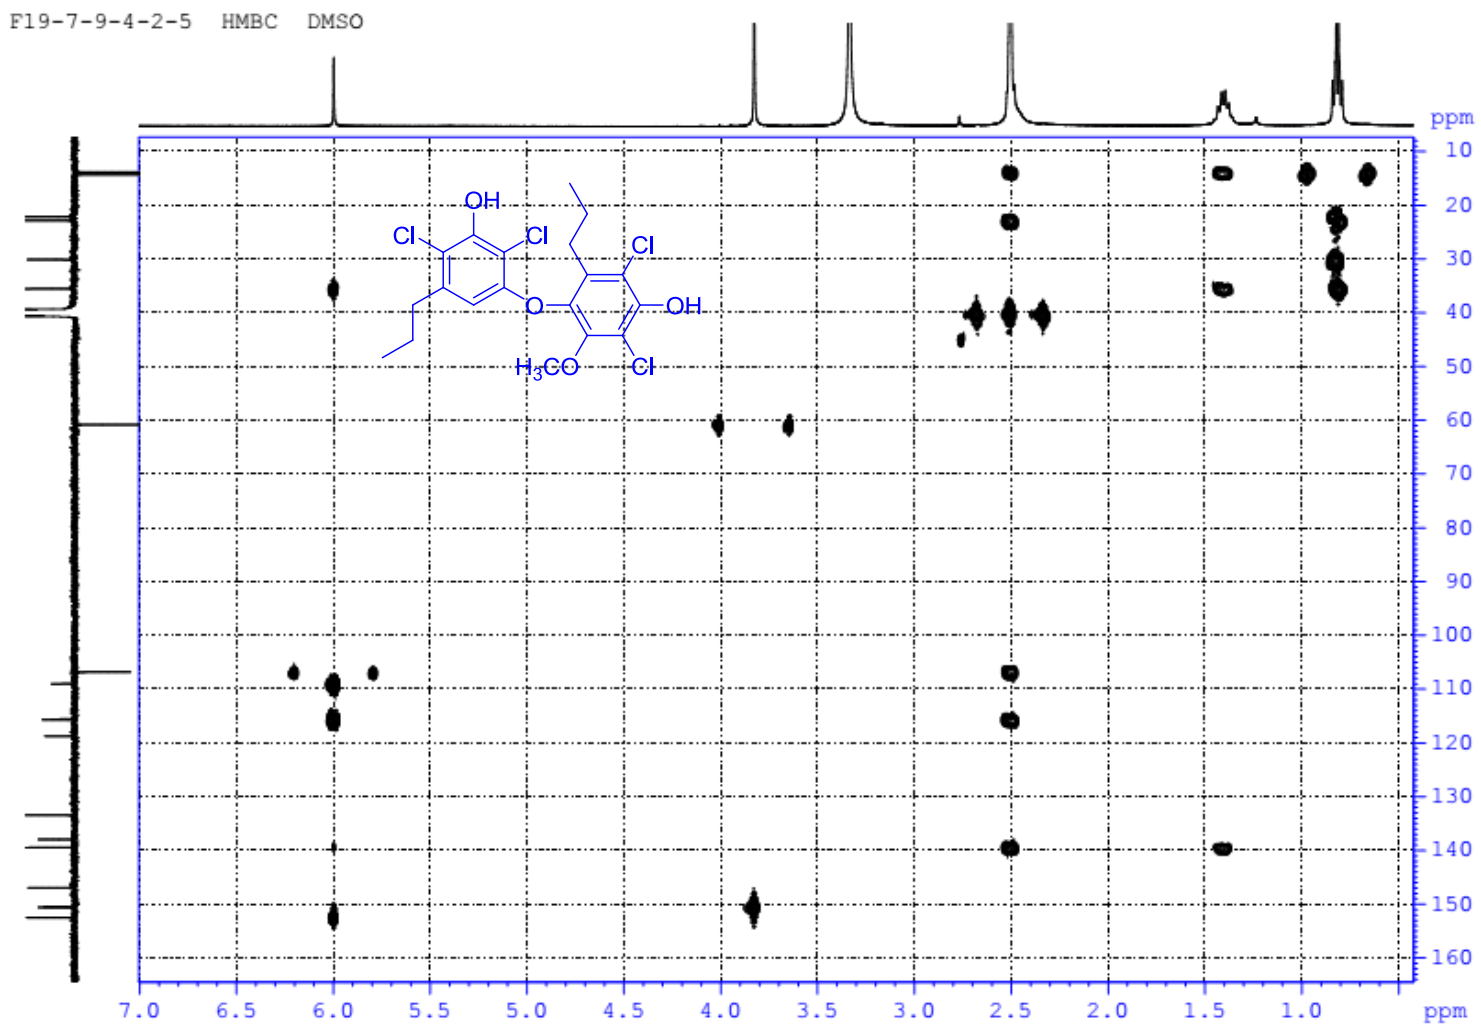

Figure S22. HMBC spectrum of compound 3 in DMSO-d6.

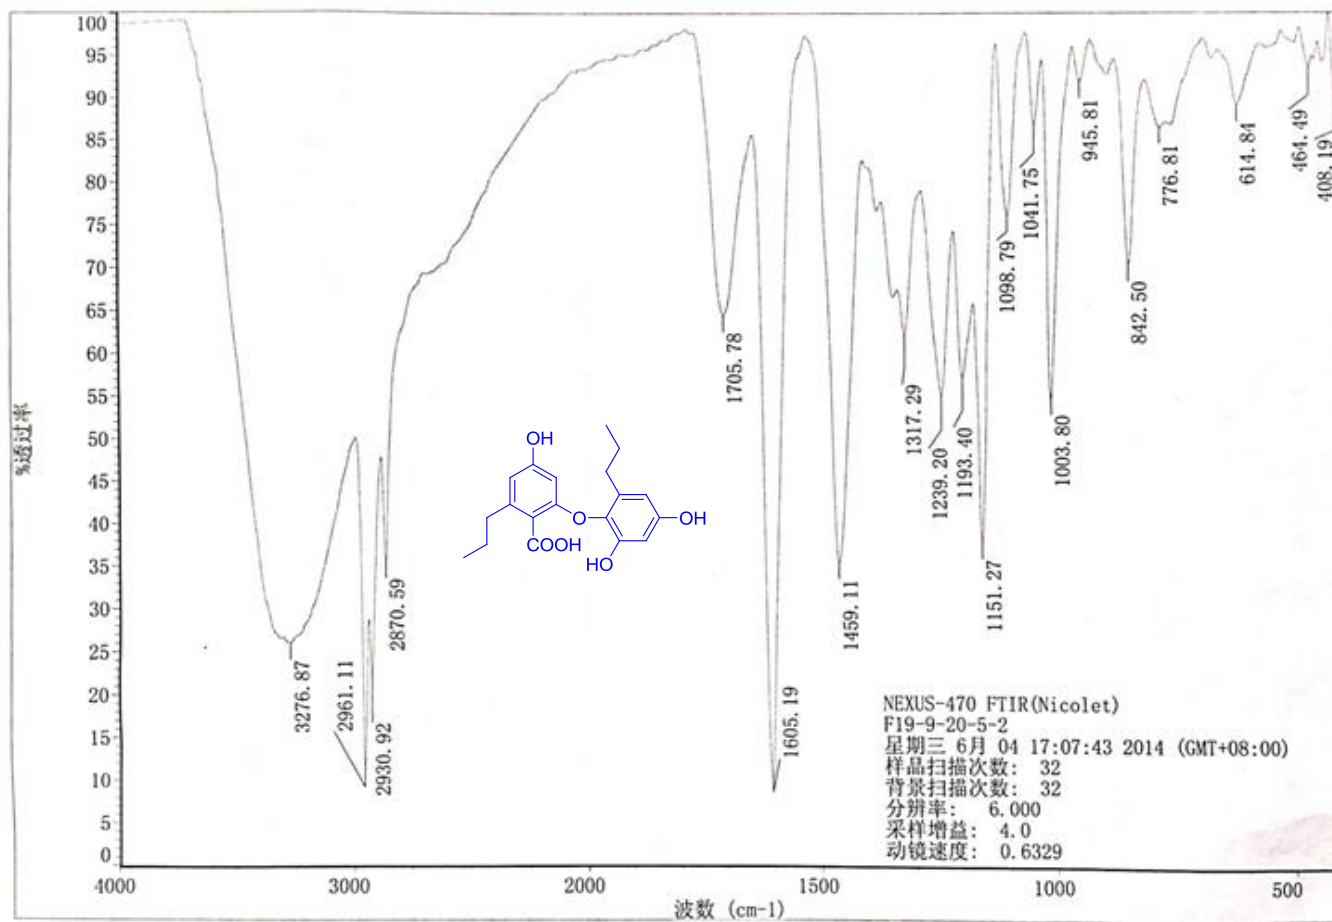

Figure S23. IR spectrum of compound 4.

Xevo G2 Q-TOF/YCA166#

07-Jul-2014

Waters

F19-9-20-5-2 11 (0.216) Cm(10:16-(37+20:53))

1: TOFMS-ES-  
2.16e5

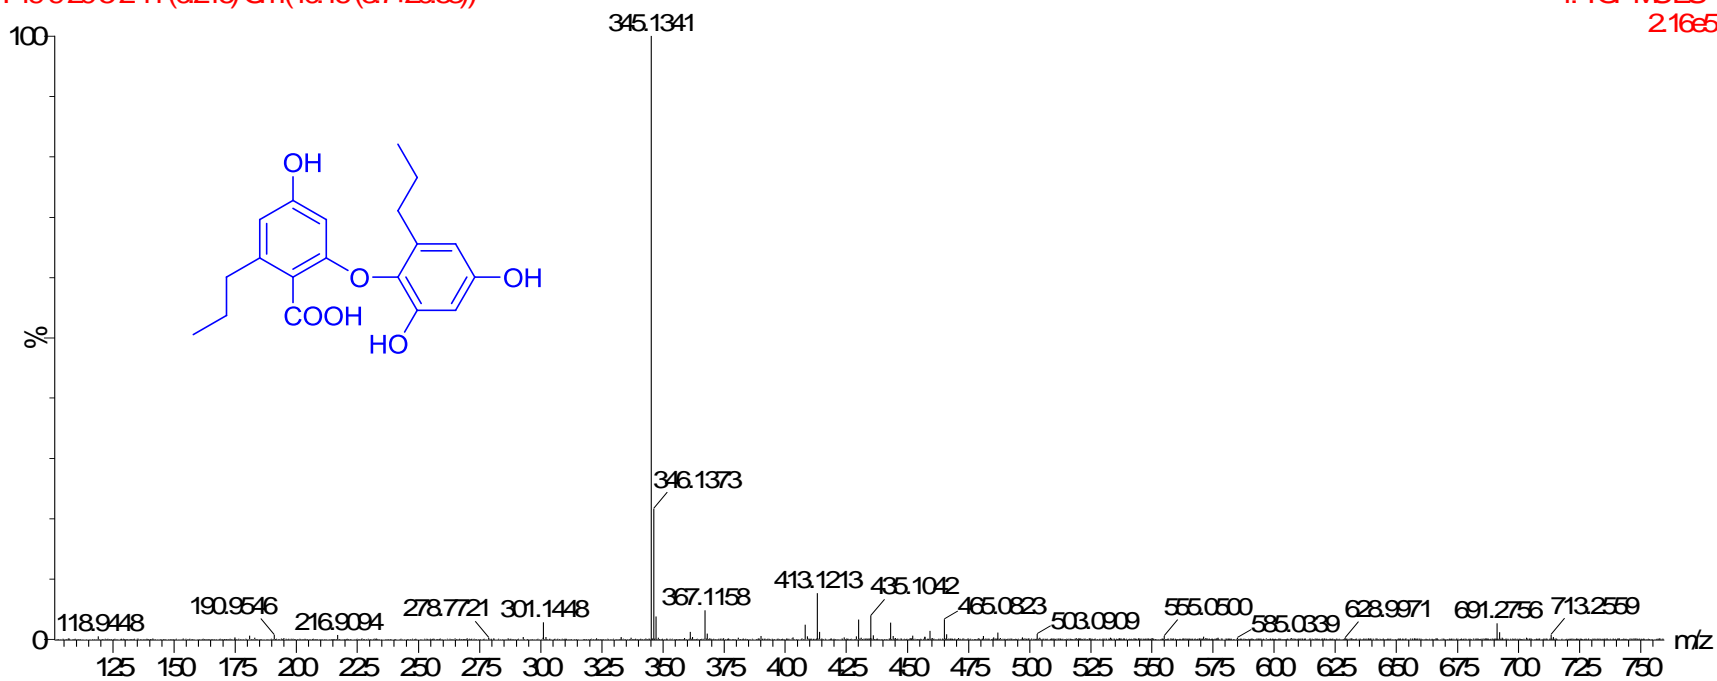

Figure S24. Negative mode HRESIMS data of compound 4.

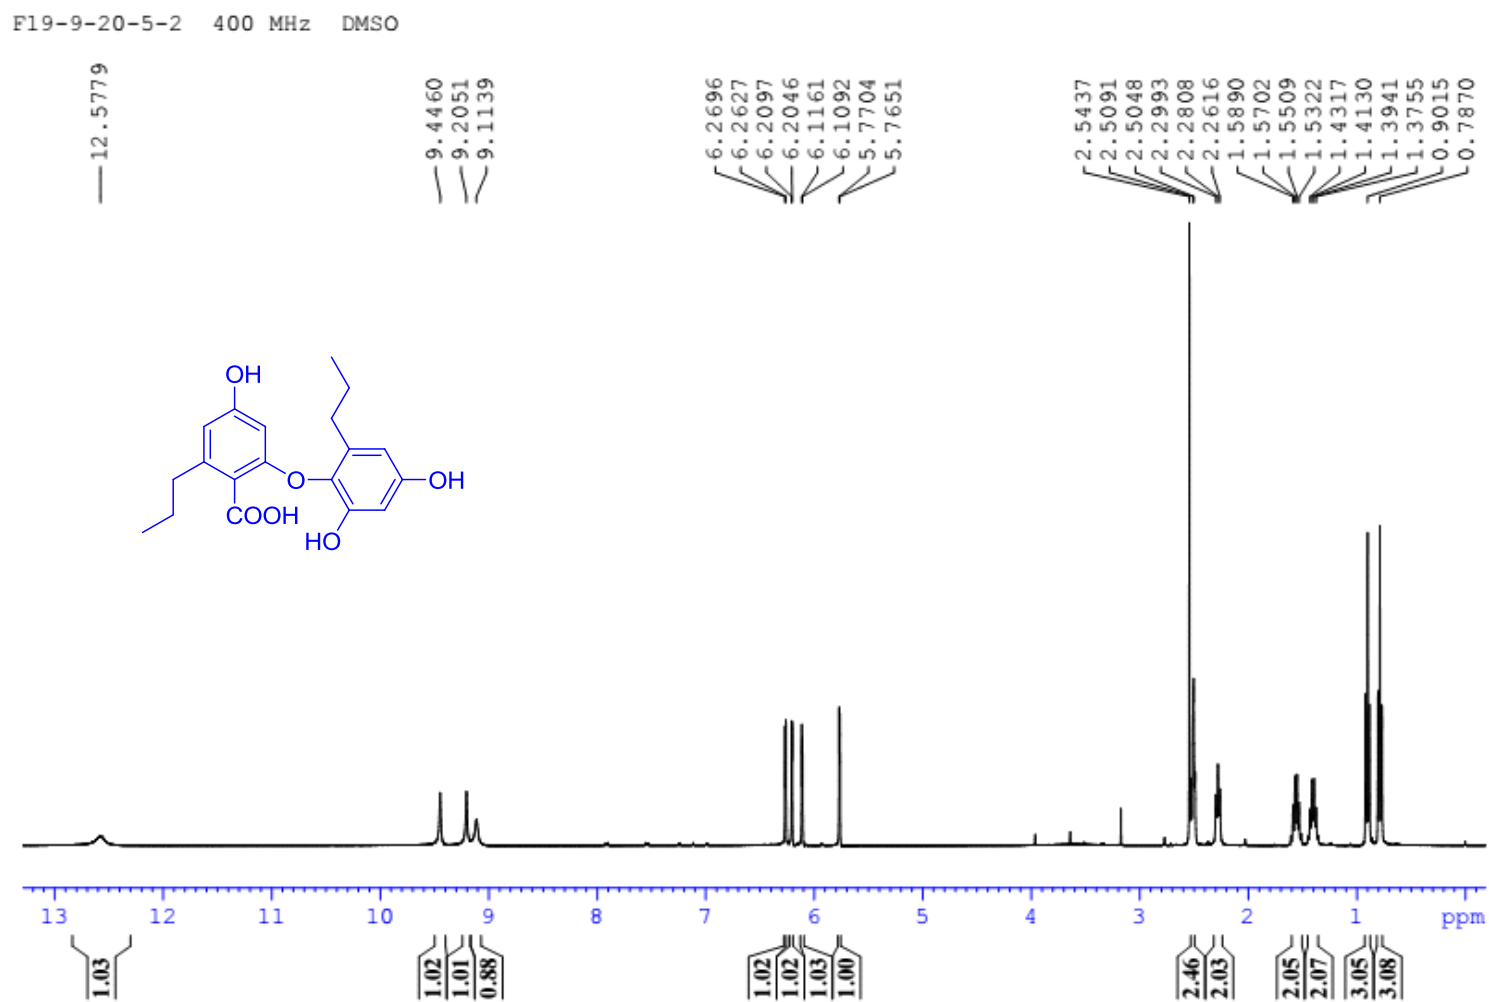

Figure S25.  $^1\text{H}$  NMR spectrum of compound 4 in DMSO- $d_6$  (400 MHz).

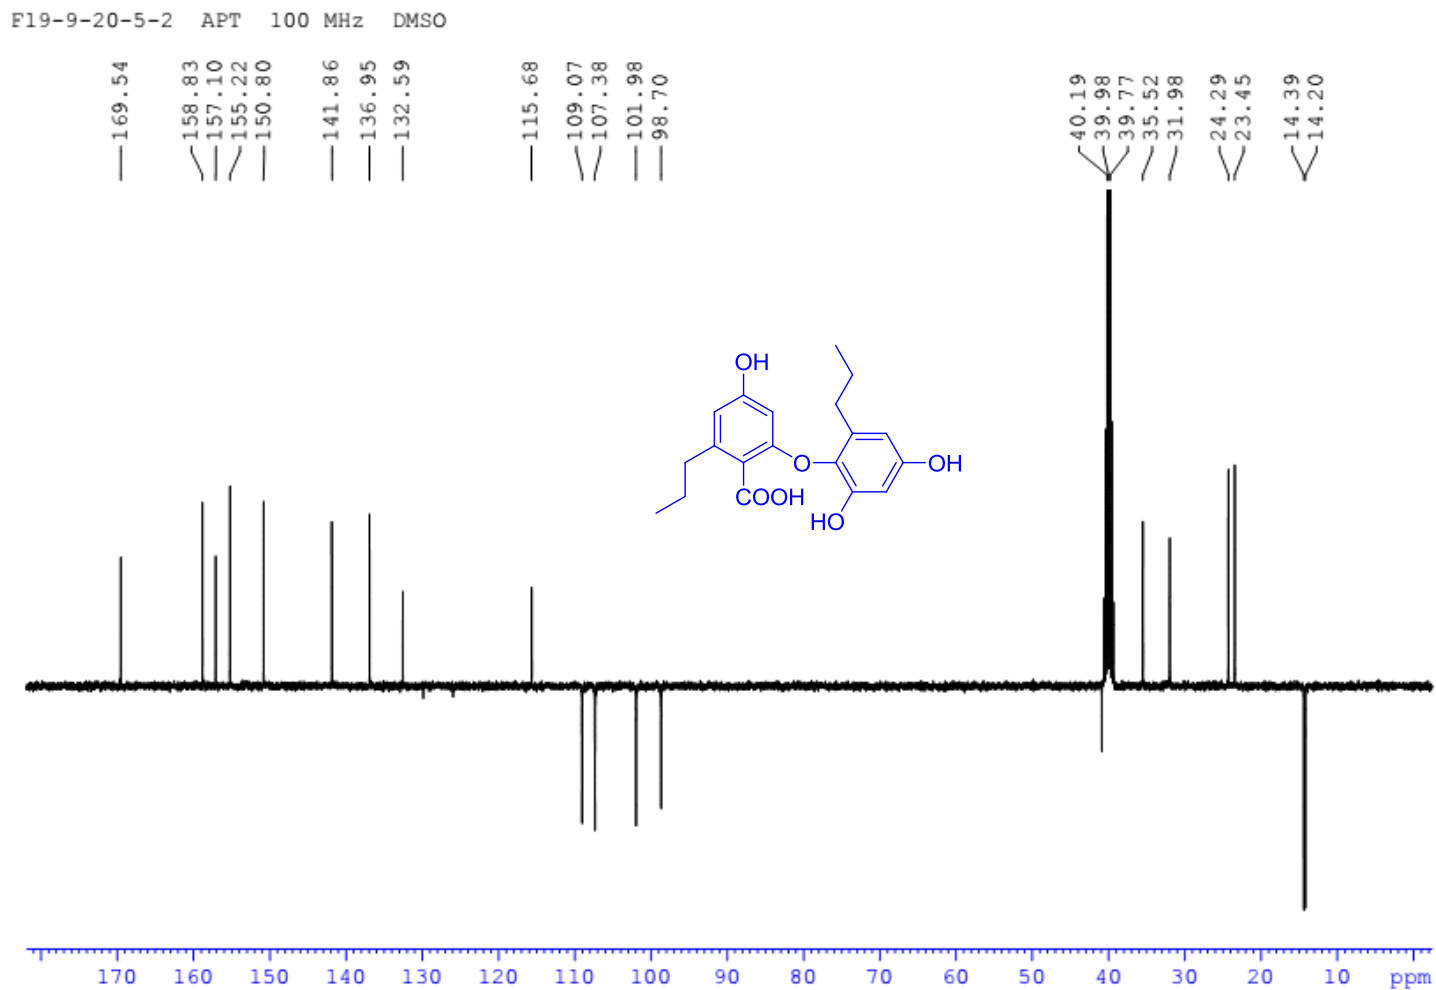

**Figure S26.**  $^{13}\text{C}$  NMR spectrum of compound 4 in DMSO- $d_6$  (100 MHz).

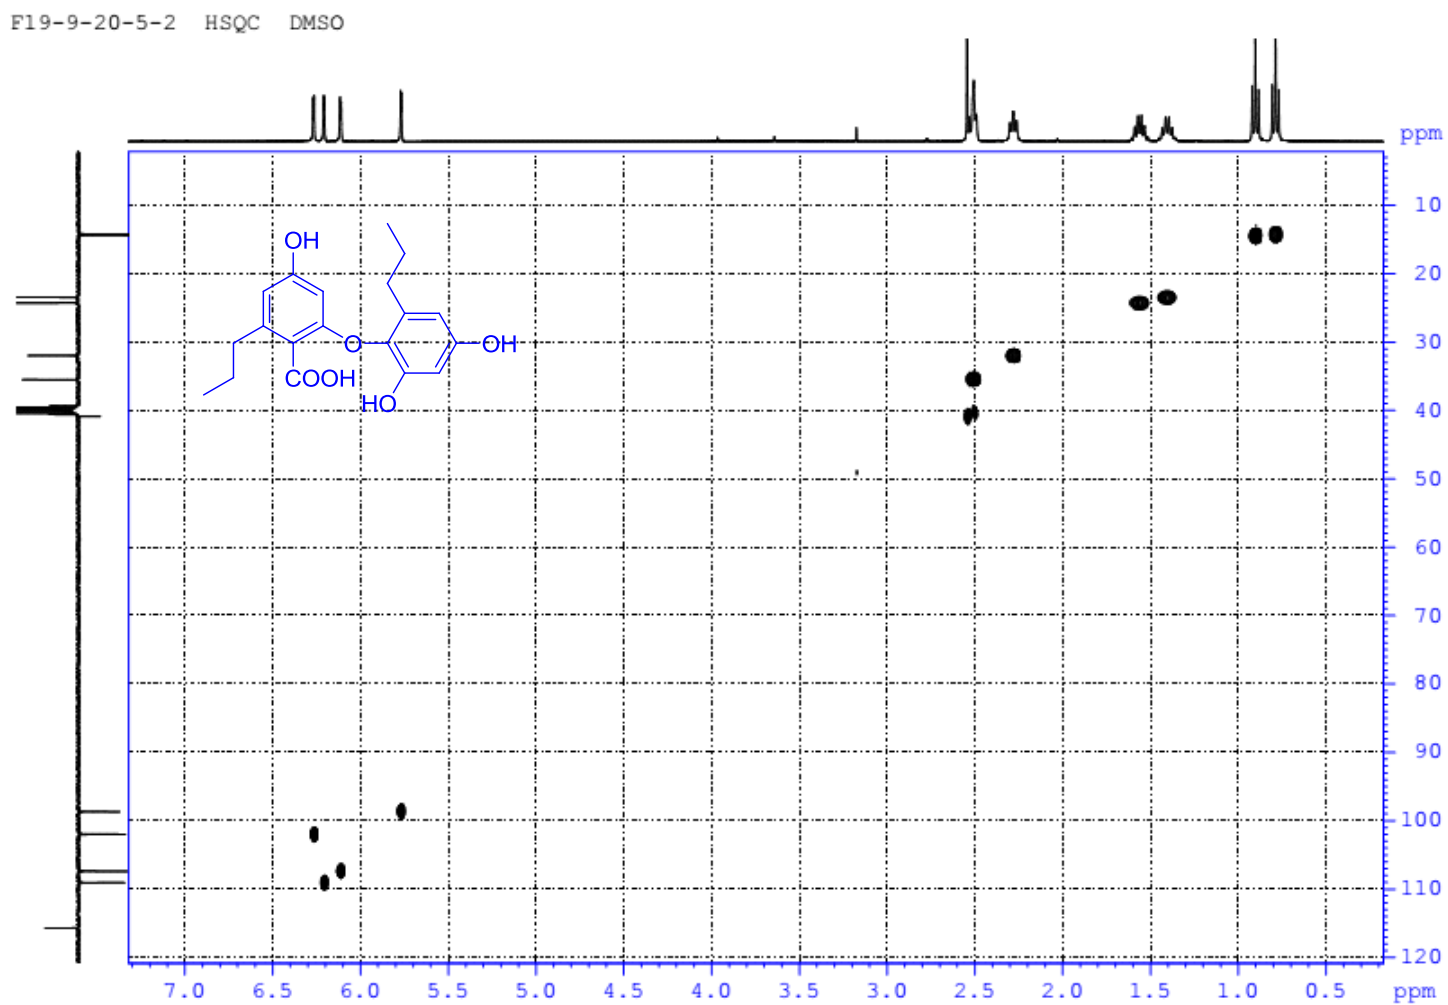

Figure S27. HSQC spectrum of compound 4 in DMSO-d<sub>6</sub>.

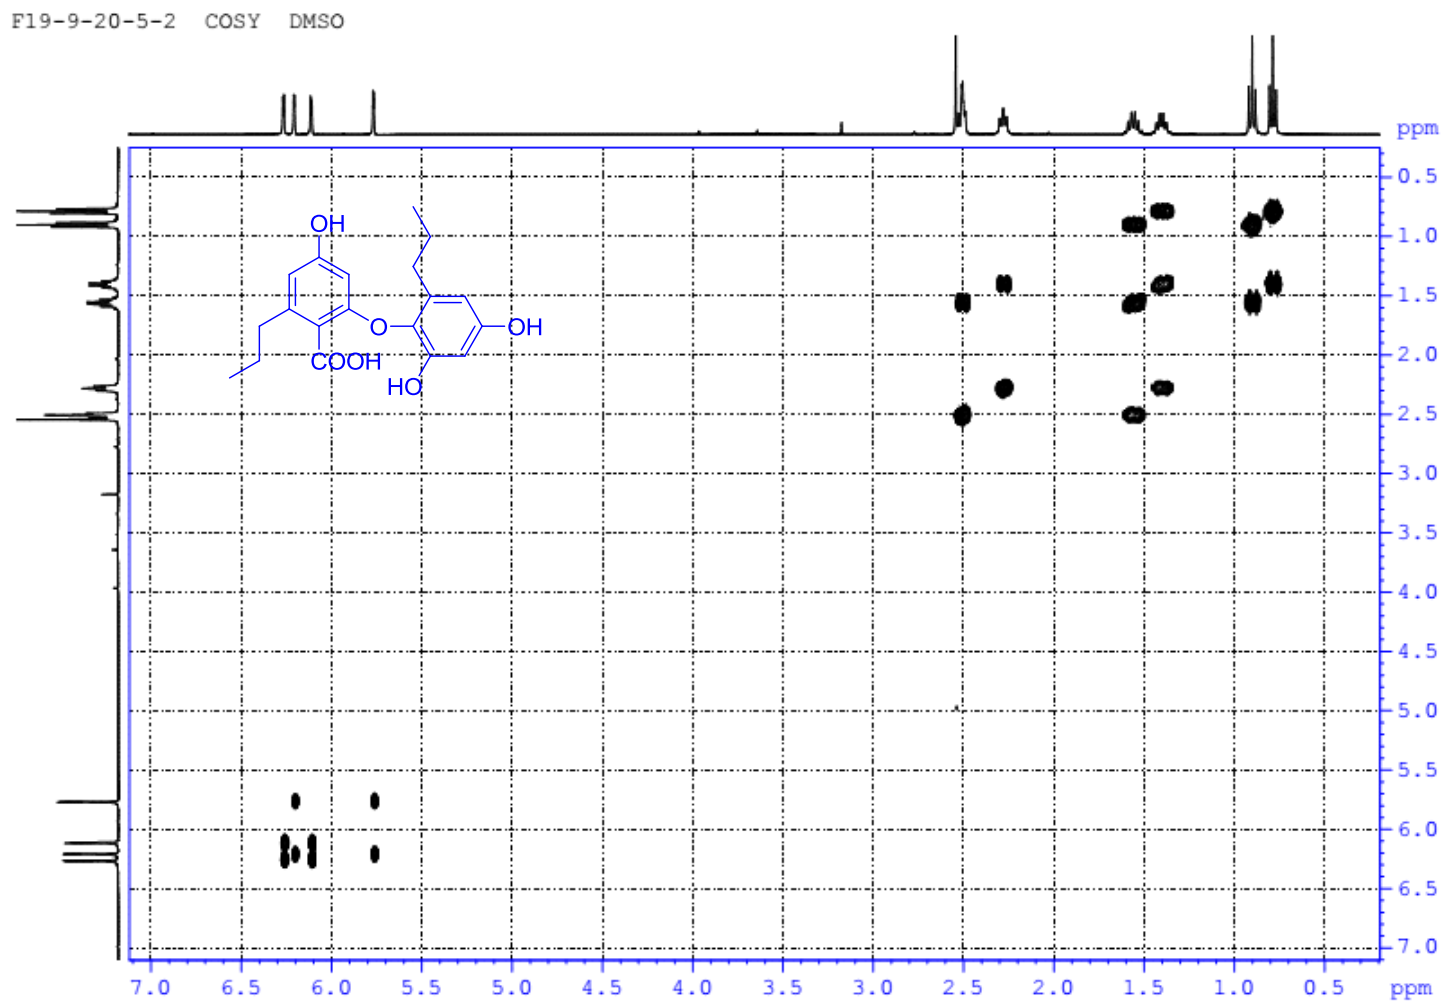

Figure S28.  $^1\text{H}$ - $^1\text{H}$  COSY spectrum of compound 4 in DMSO- $d_6$ .

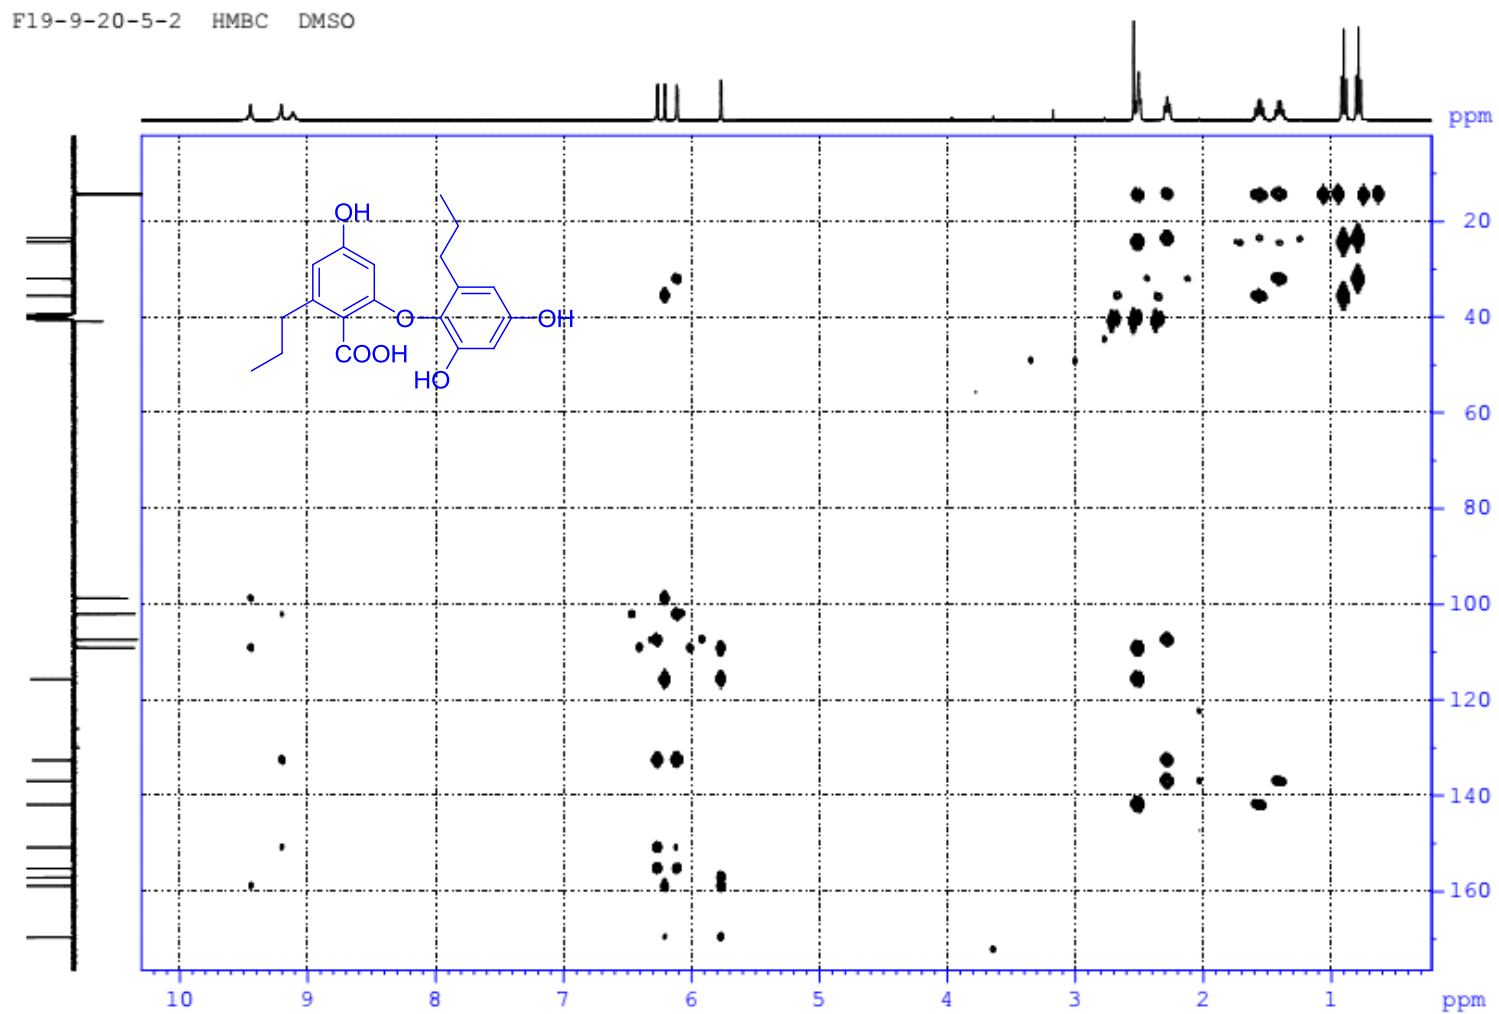

Figure S29. HMBC spectrum of compound 4 in DMSO-d<sub>6</sub>.



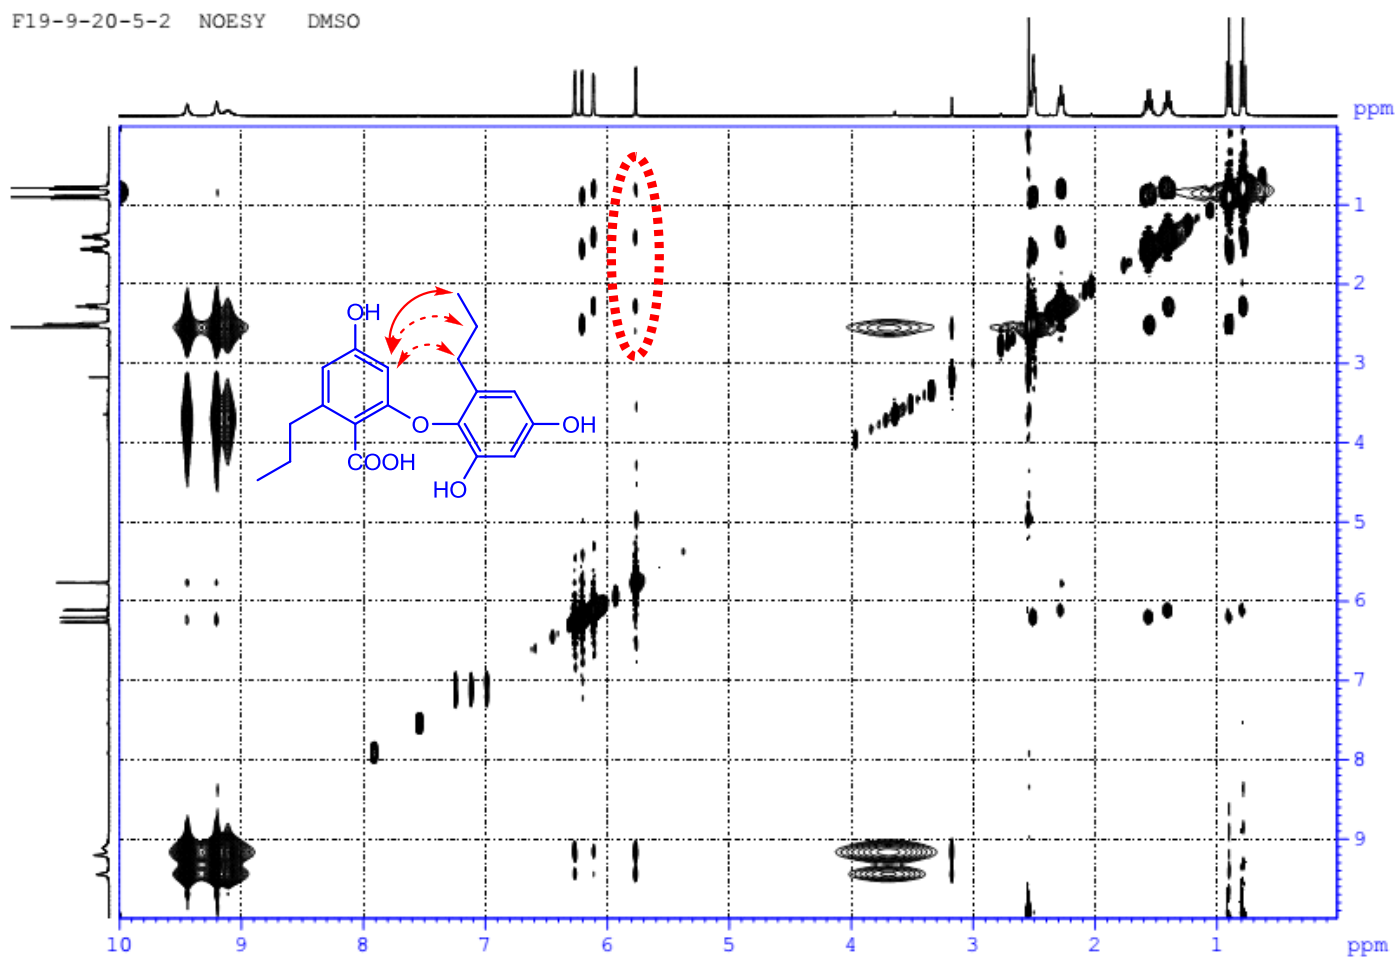

Figure S30. NOESY spectrum of compound 4 in DMSO-d6.

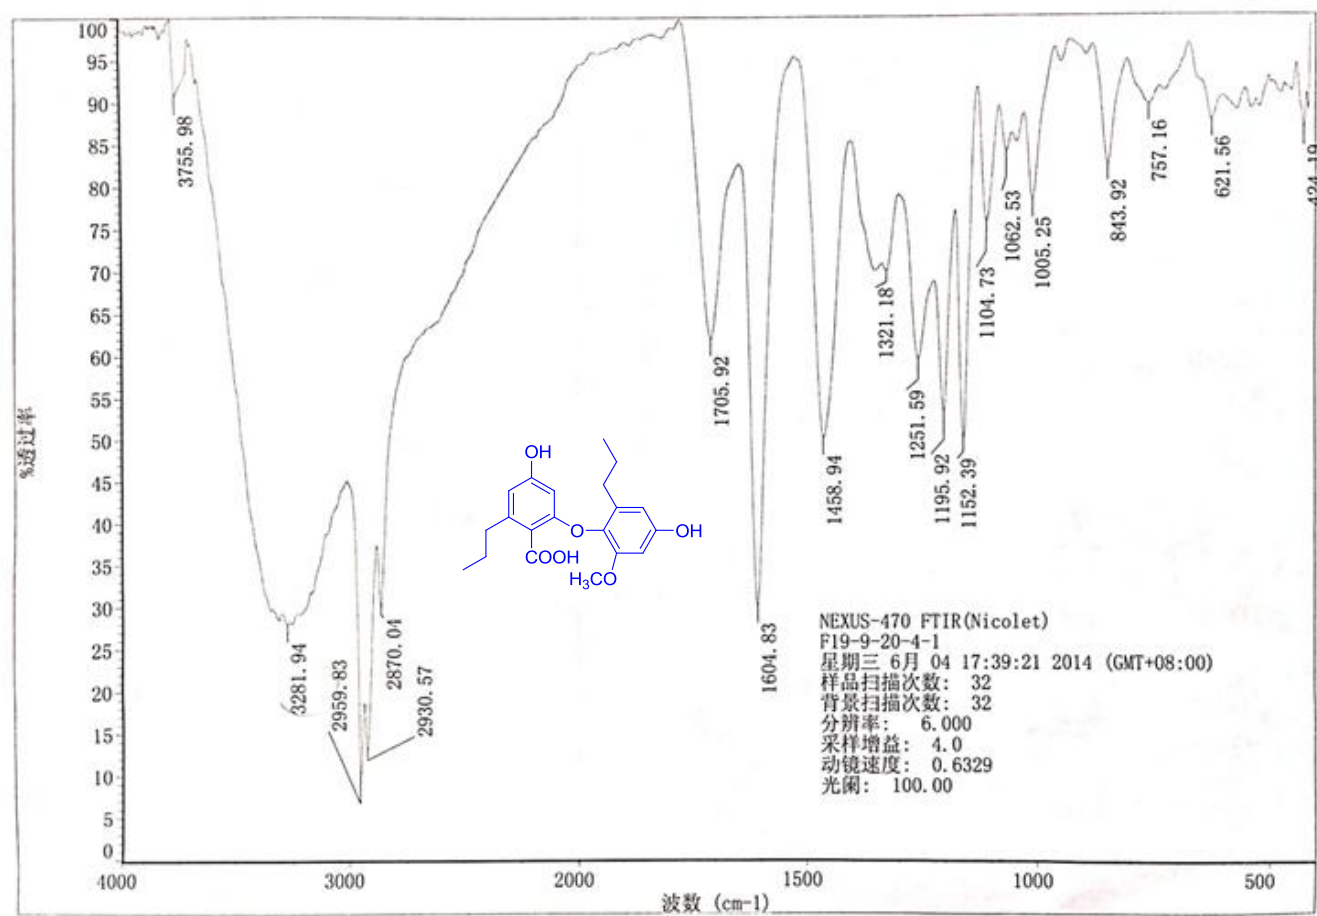

Figure S31. IR spectrum of compound 5.

Xevo G2 Q-TOF/YCA166#

07-Jul-2014

Waters

F19-9-20-4-1 11 (0.216) Cm(11:15-(36+2253))

1: TOFMS ES-  
5.85e4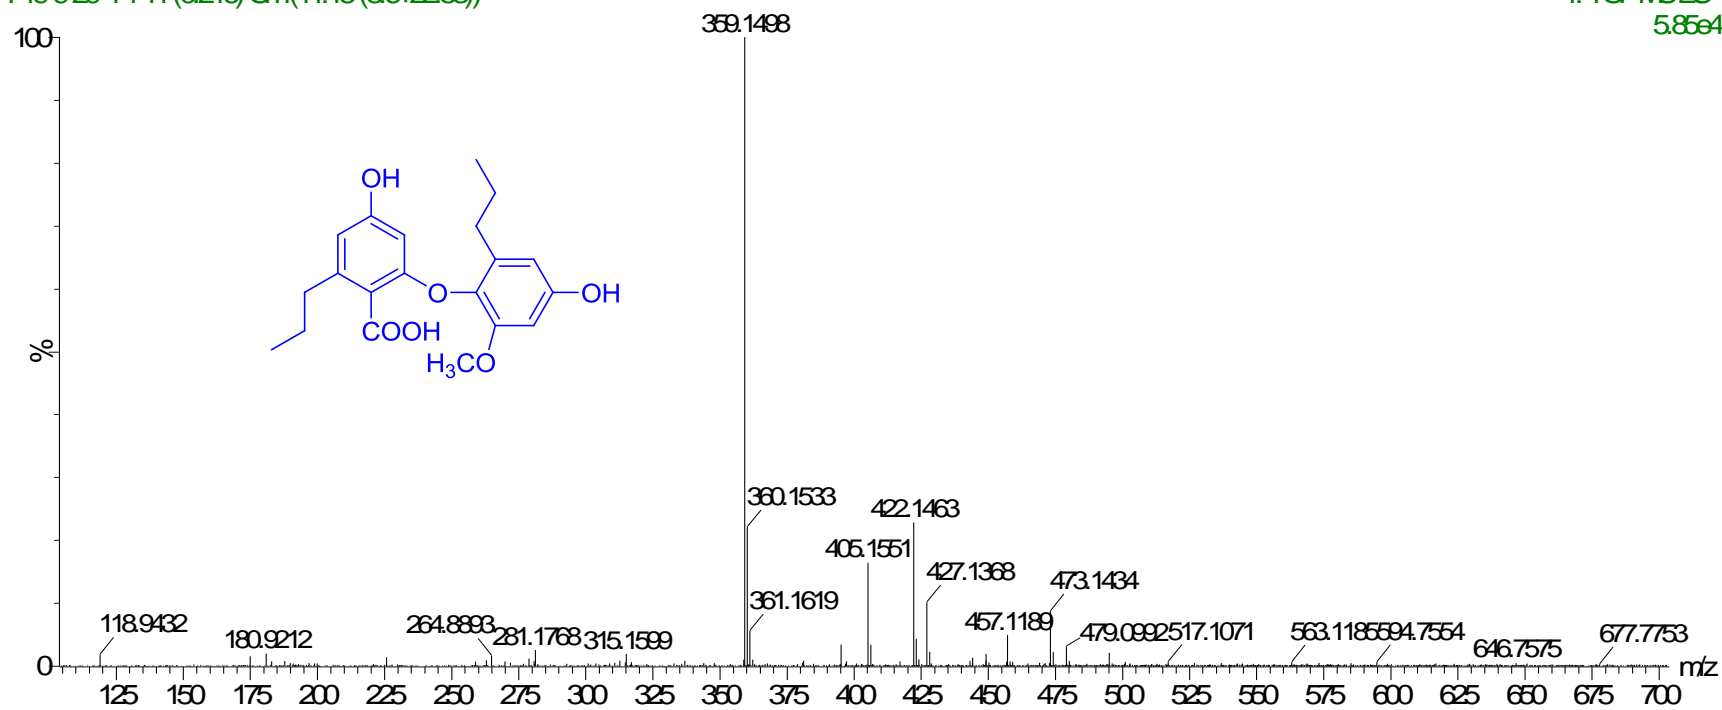

Figure S32. Negative mode HRESIMS data of compound 5.

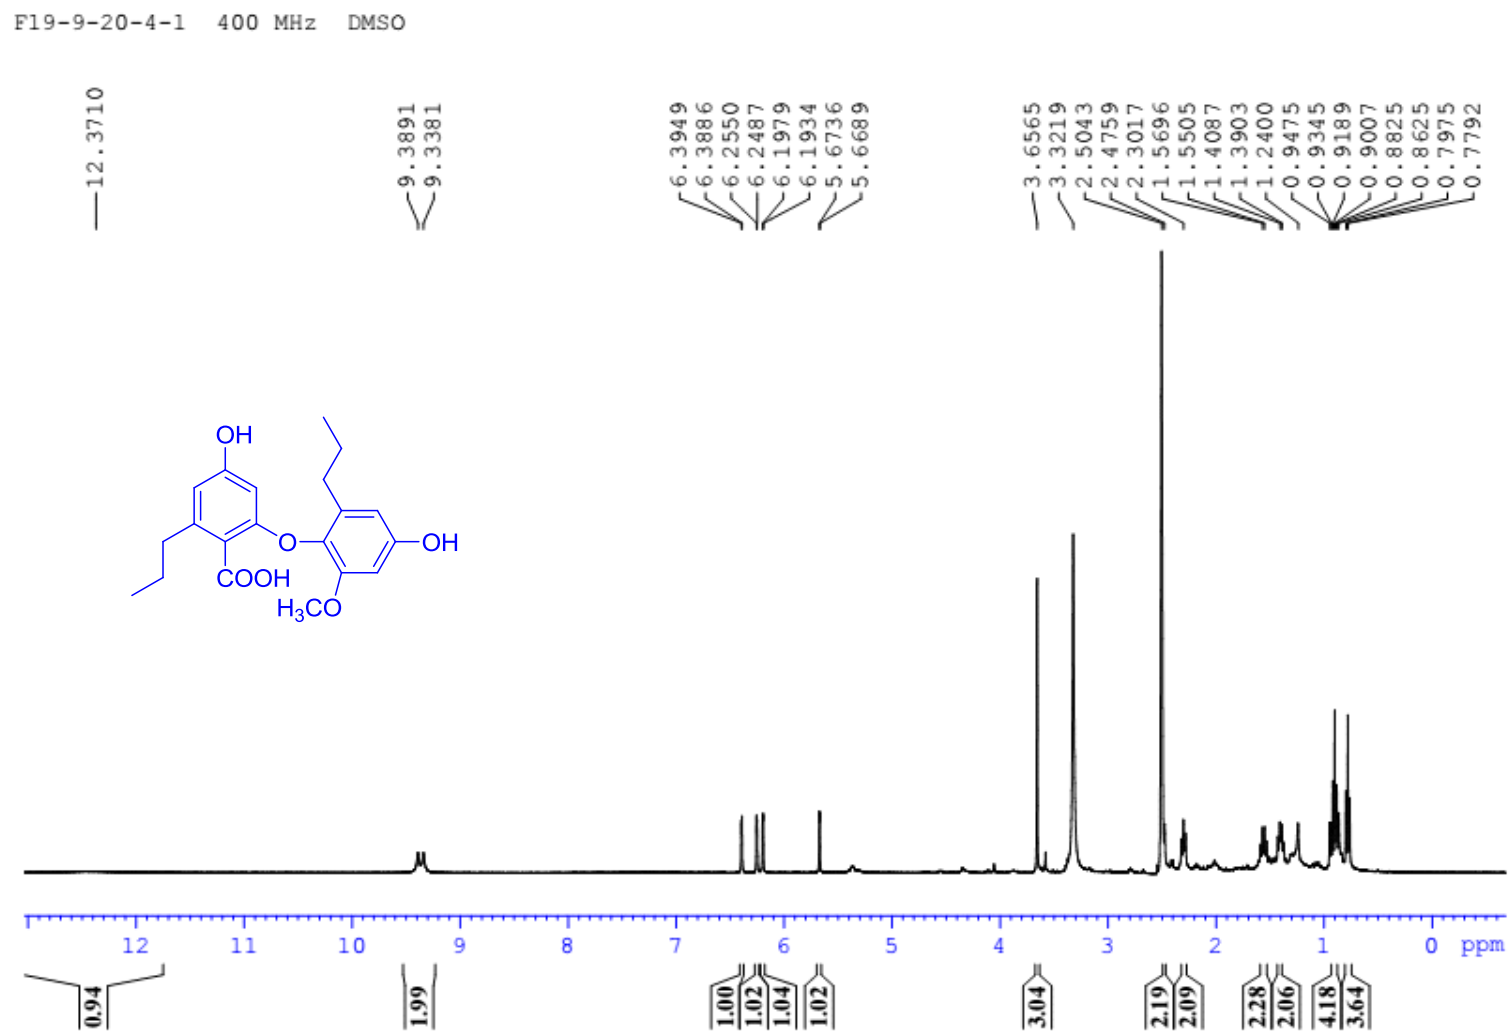

Figure S33. <sup>1</sup>H NMR spectrum of compound 5 in DMSO-d<sub>6</sub> (400 MHz).

F19-9-20-4-1 APT 100 MHz DMSO

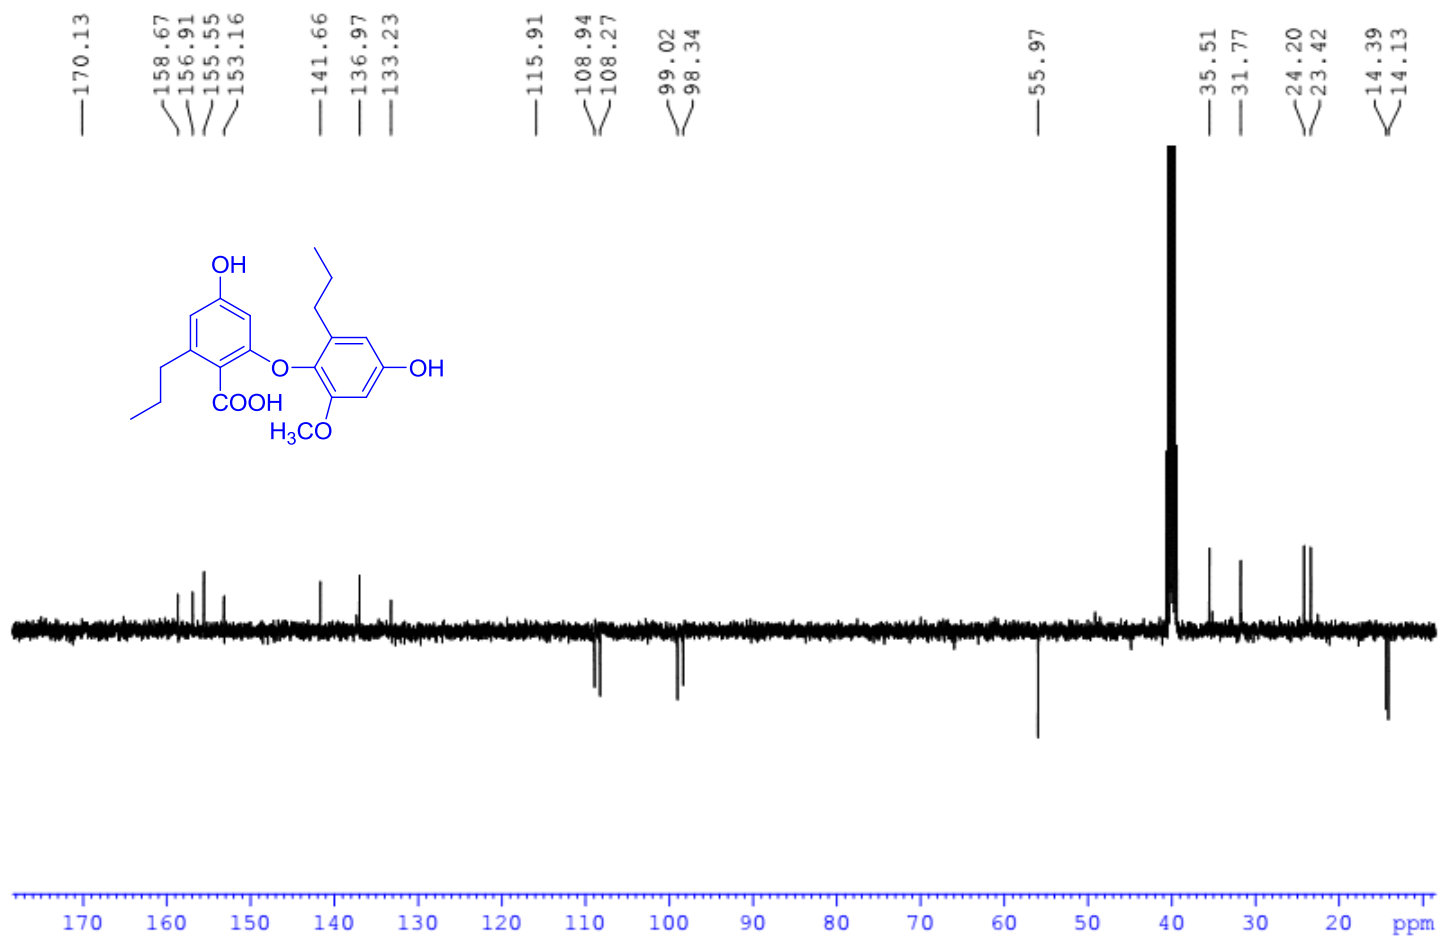

Figure S34. <sup>13</sup>C NMR spectrum of compound 5 in DMSO-d<sub>6</sub> (100 MHz).

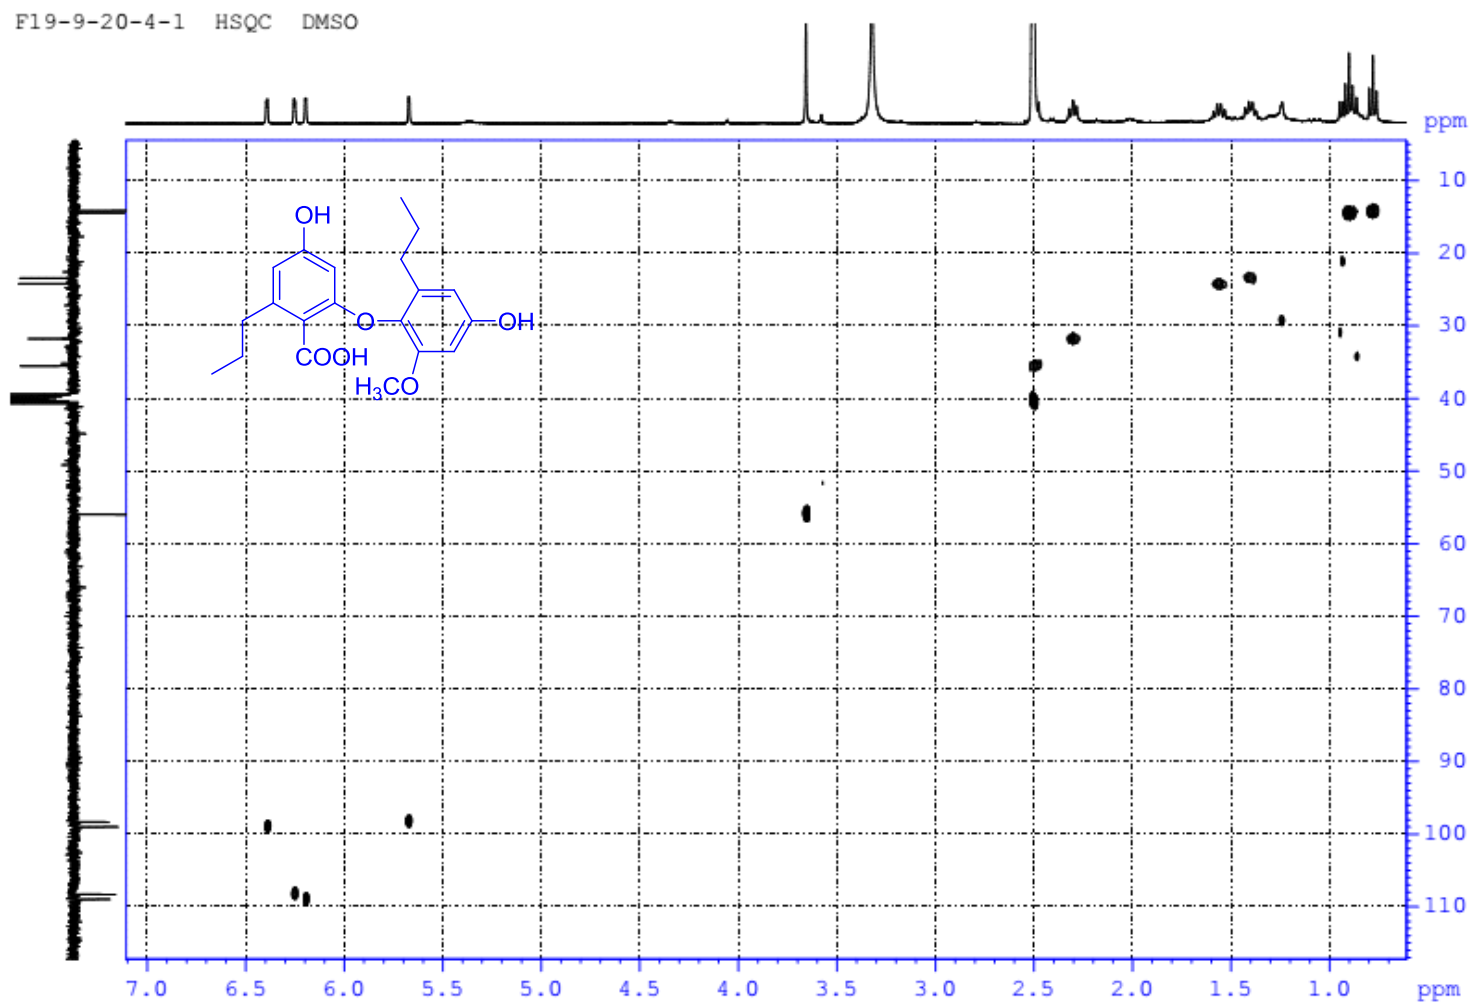

Figure S35. HSQC spectrum of compound 5 in DMSO-d6.

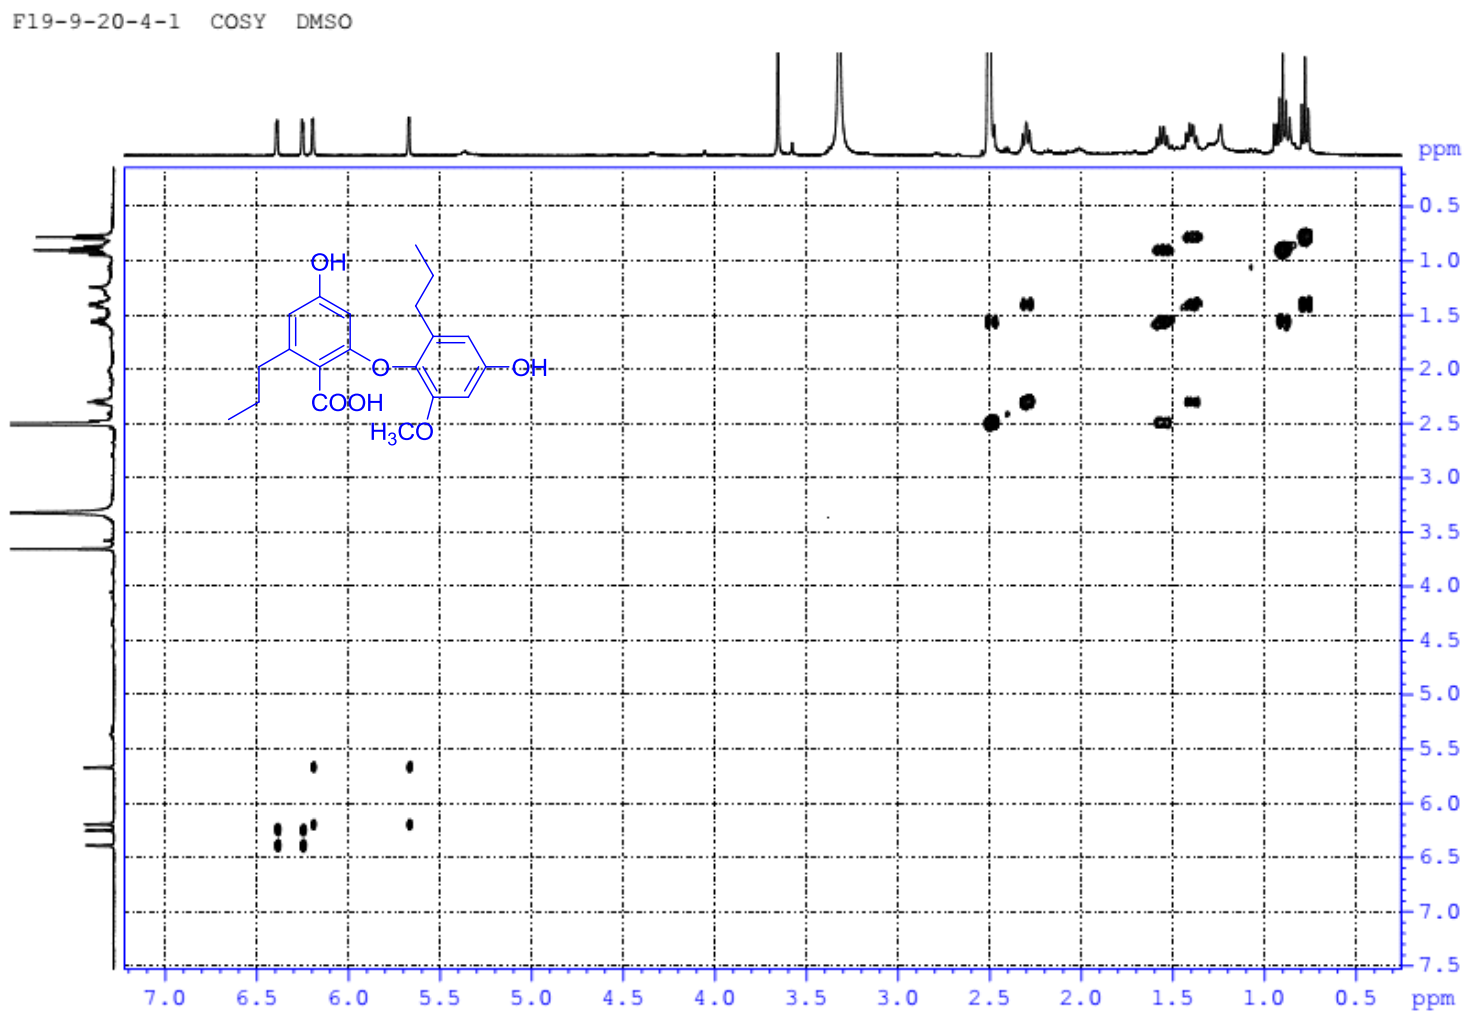

Figure S36. <sup>1</sup>H-<sup>1</sup>H COSY spectrum of compound 5 in DMSO-d<sub>6</sub>.

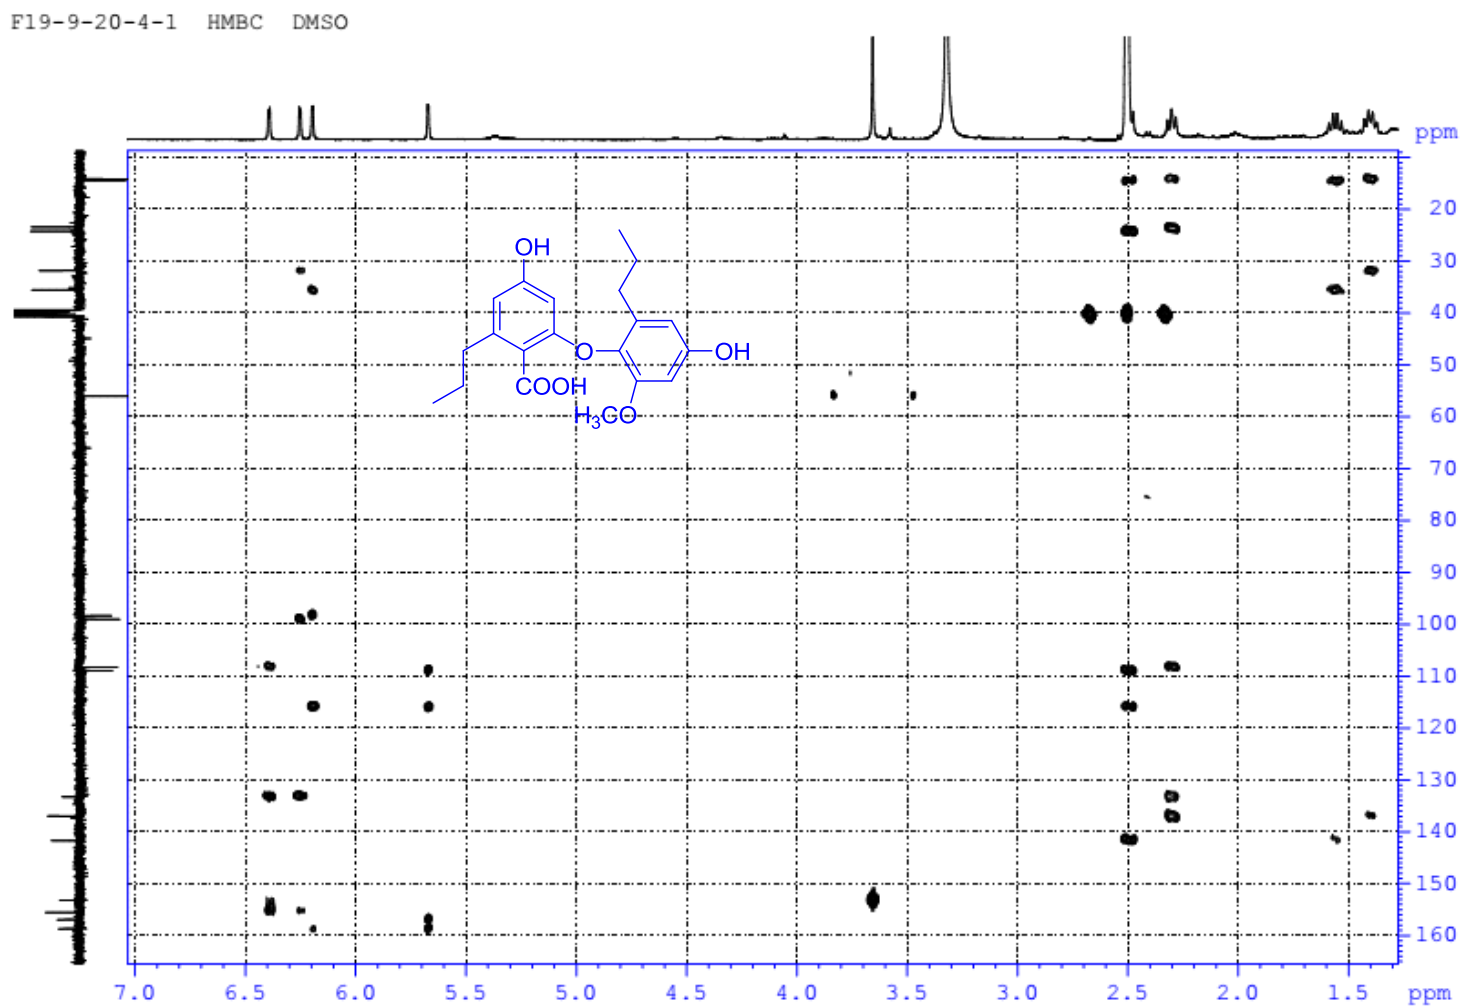

Figure S37. HMBC spectrum of compound 5 in DMSO-d<sub>6</sub>.



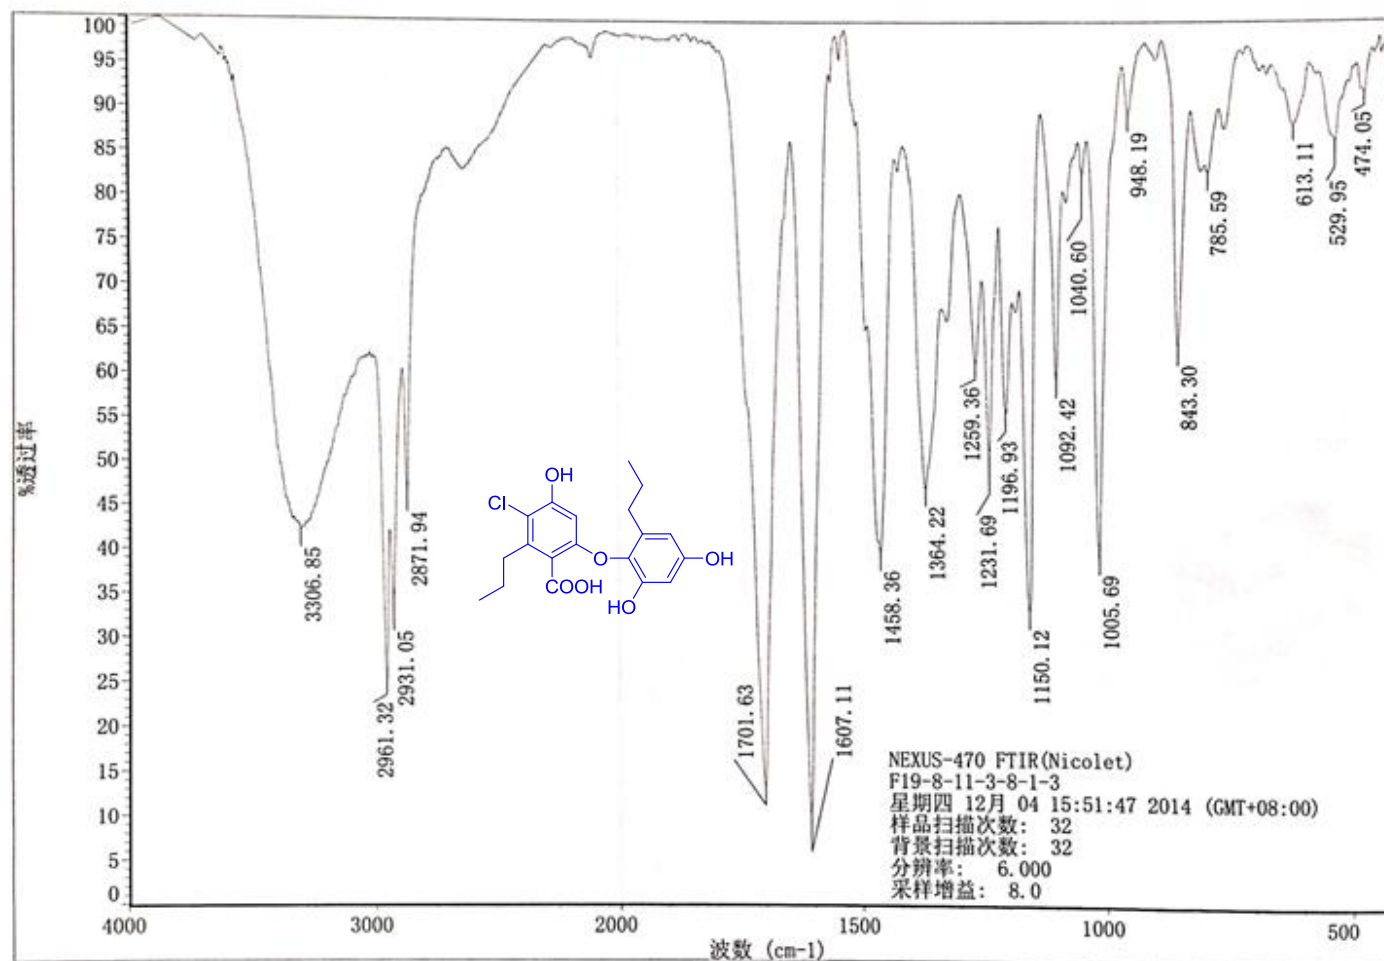

Figure S38. IR spectrum of compound 6.

Xevo G2 Q-TOF/YCA166#

02-Dec-2014

Waters

F19-8-13-8-1-3 NEG 13 (0.250) Cm (11:16-(2:6+28:51))

1: TOF MS ES-  
1.26e5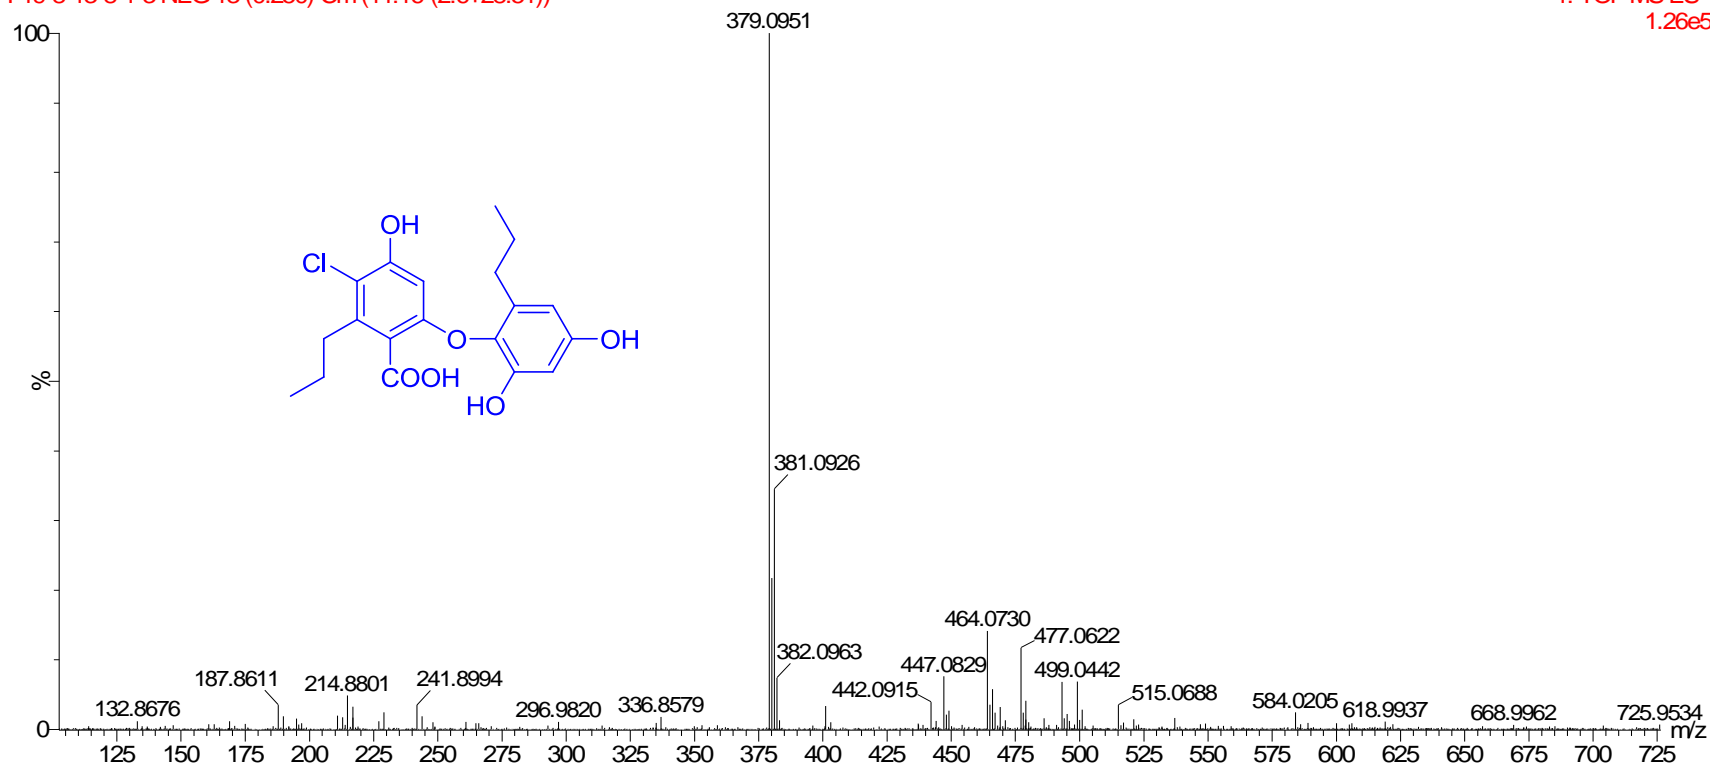**Figure S39.** Negative mode HRESIMS data of compound 6.

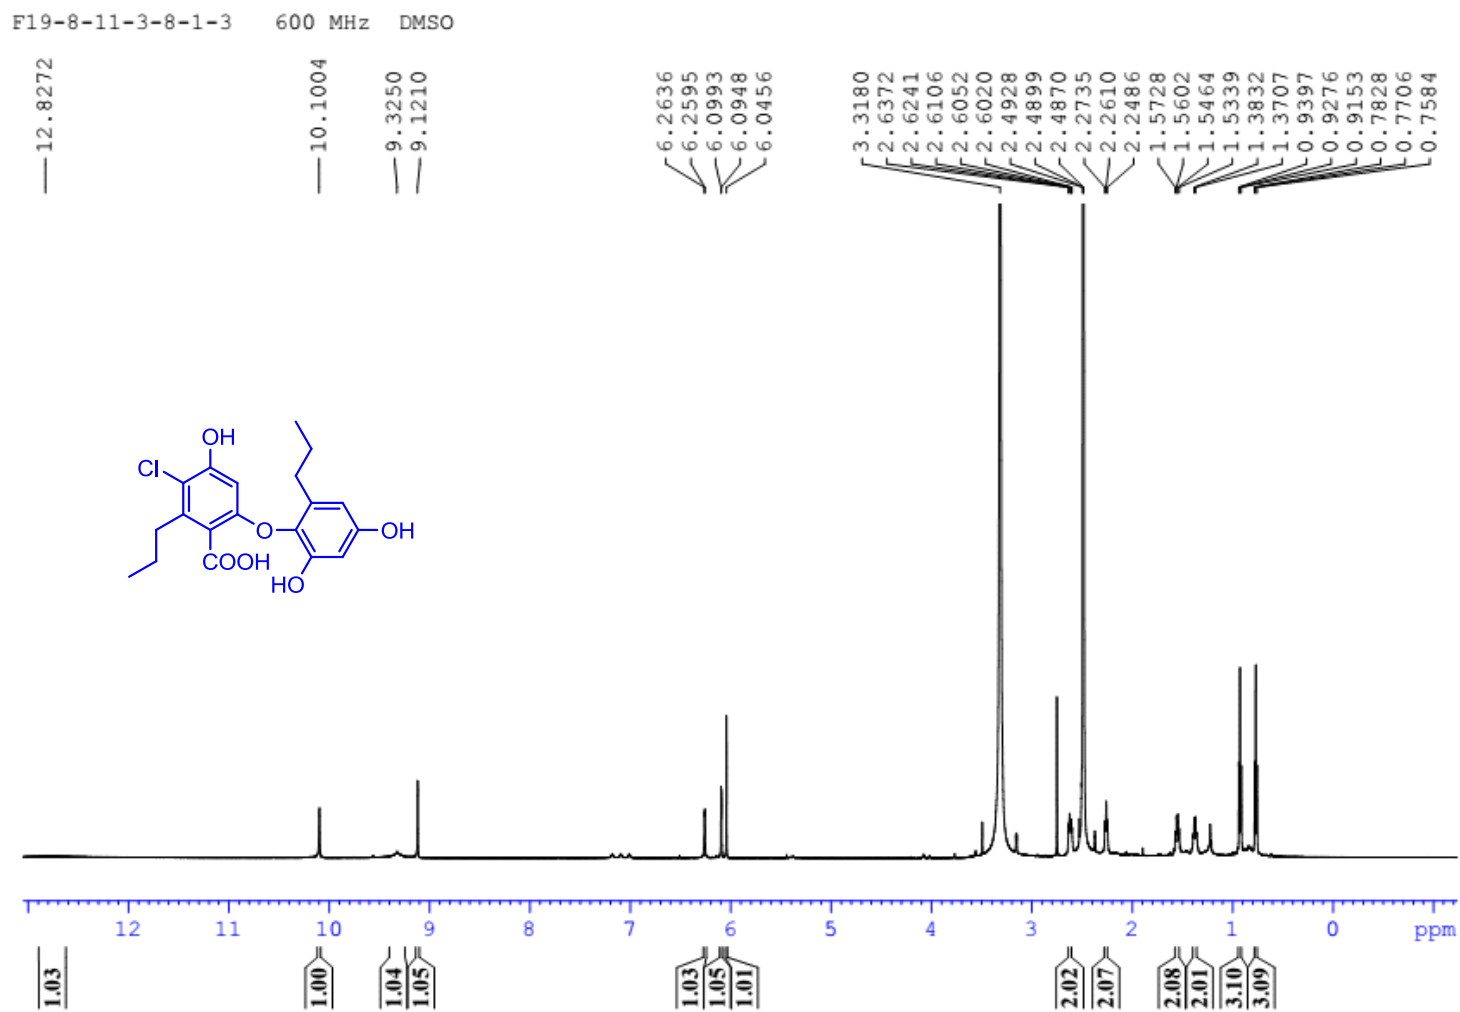

**Figure S40.**  $^1\text{H}$  NMR spectrum of compound **6** in DMSO- $d_6$  (600 MHz).

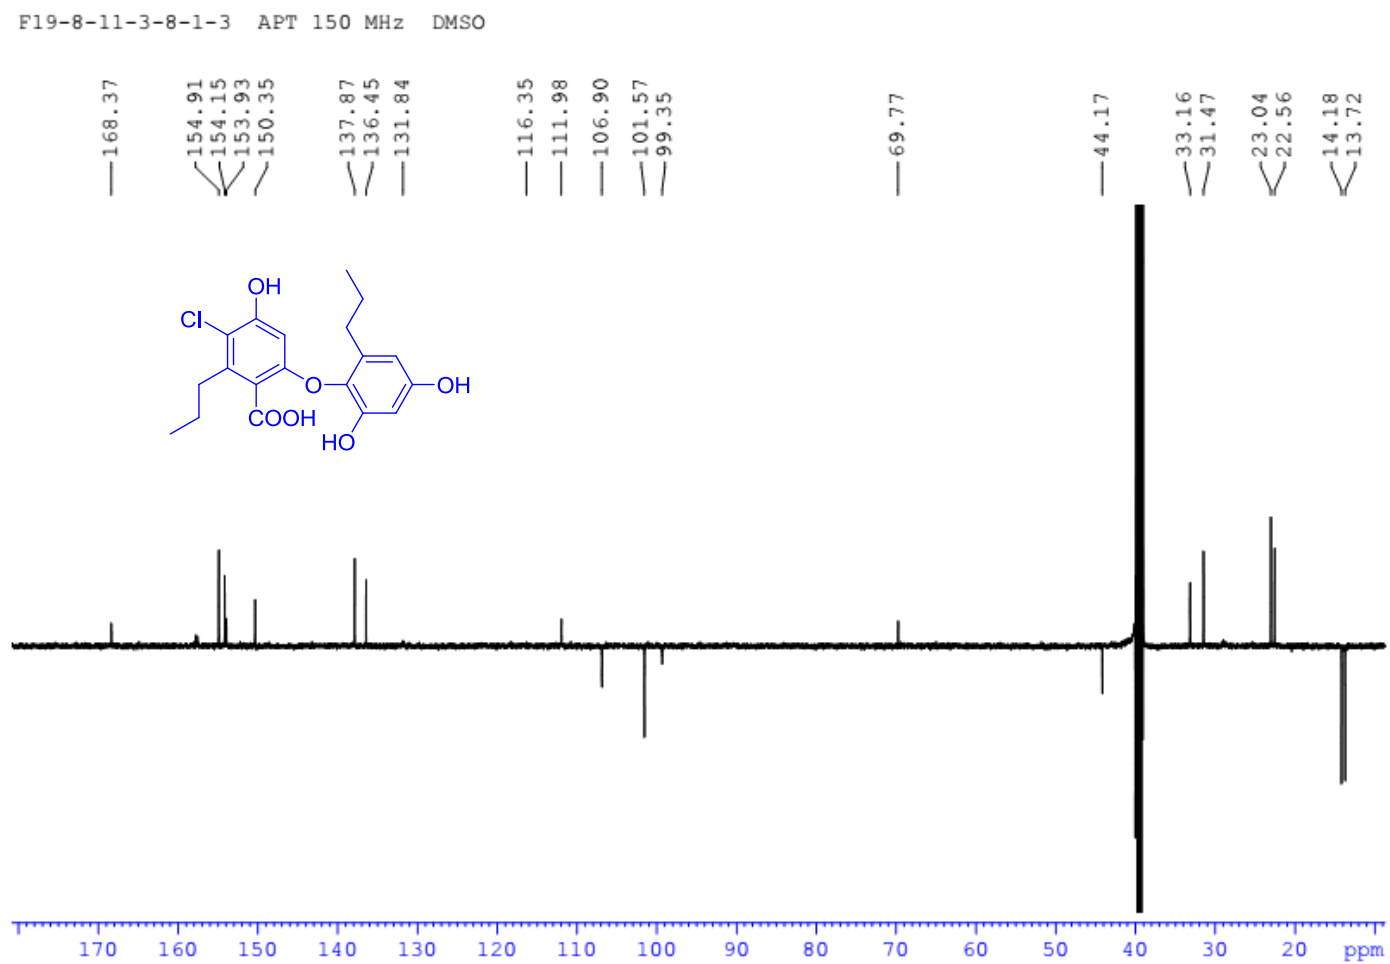

**Figure S41.**  $^{13}\text{C}$  NMR spectrum of compound **6** in DMSO-d<sub>6</sub> (150 MHz).

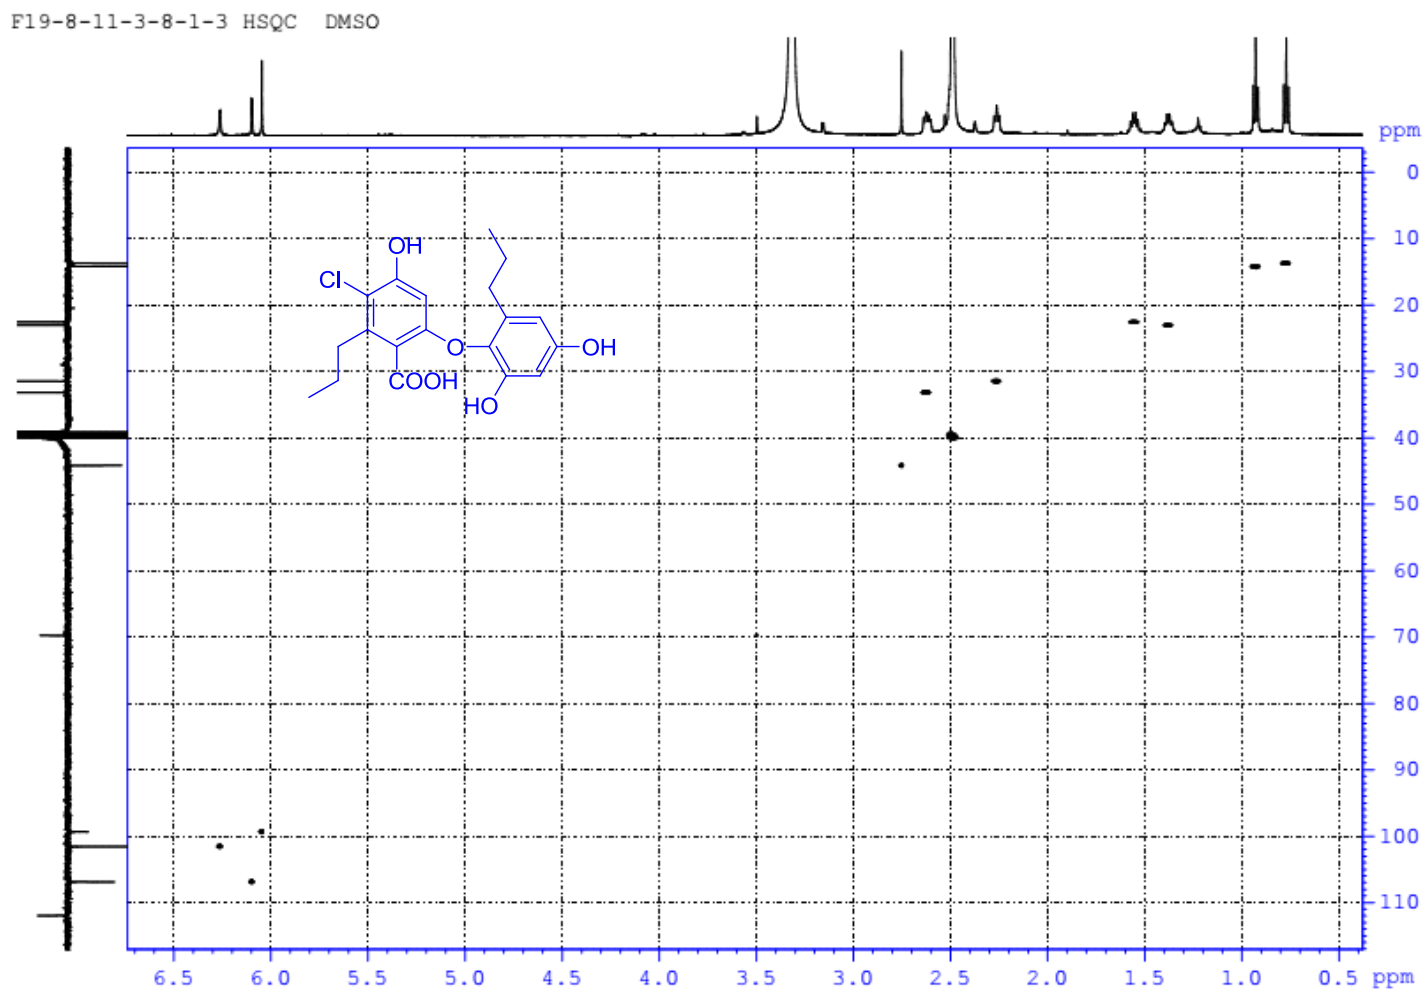

Figure S42. HSQC spectrum of compound 6 in DMSO-d6.

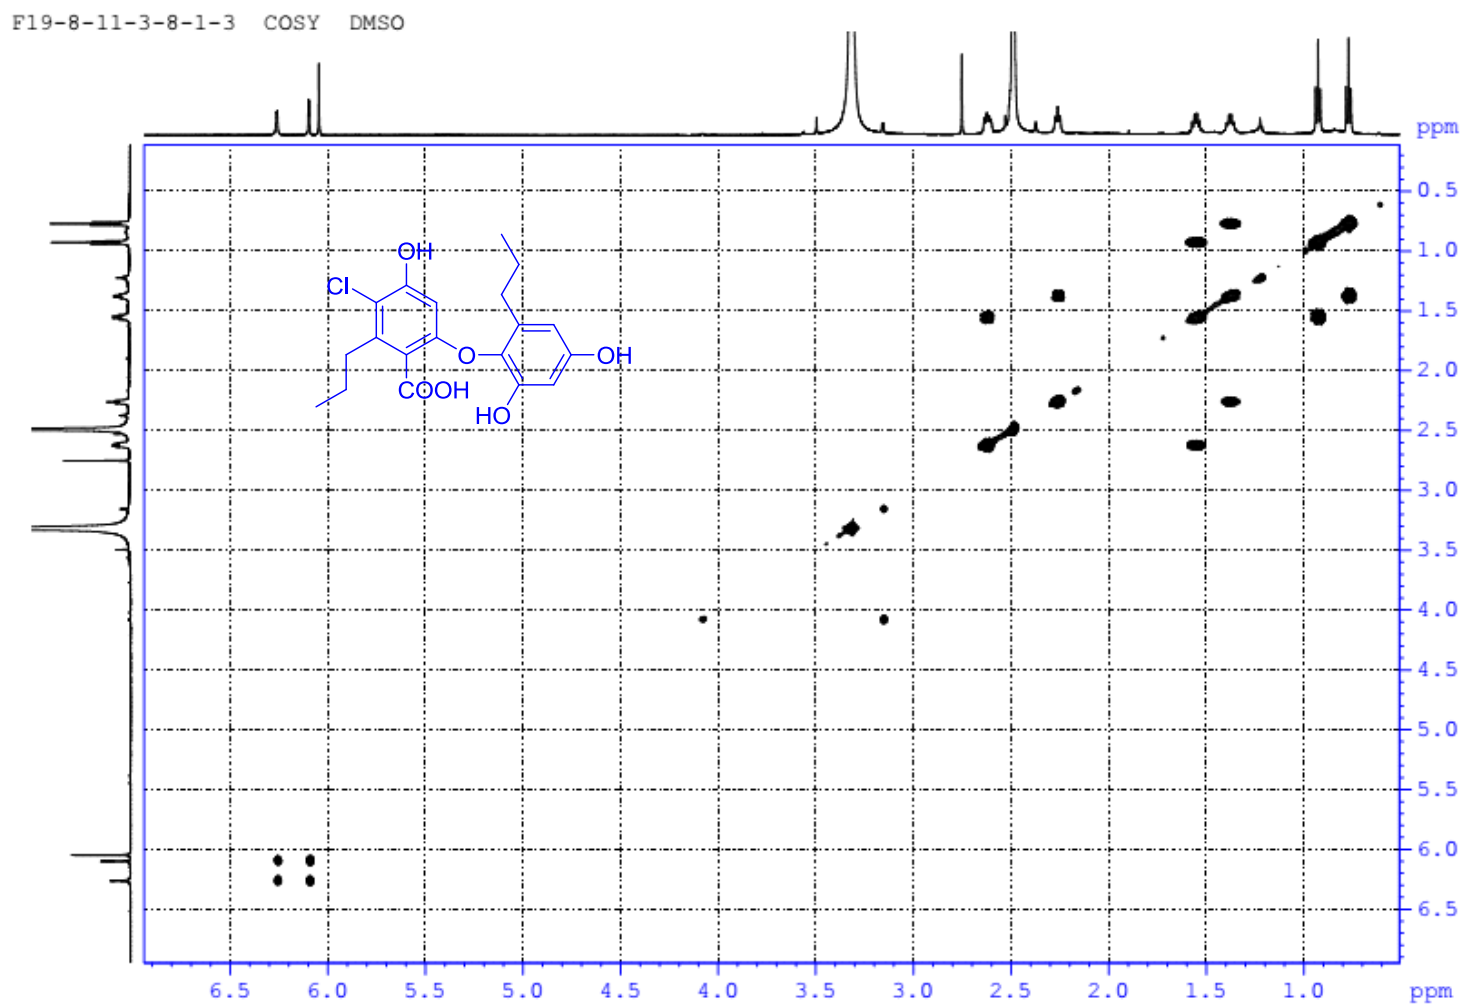

**Figure S43.**  $^1\text{H}$ - $^1\text{H}$  COSY spectrum of compound **6** in DMSO- $d_6$ .

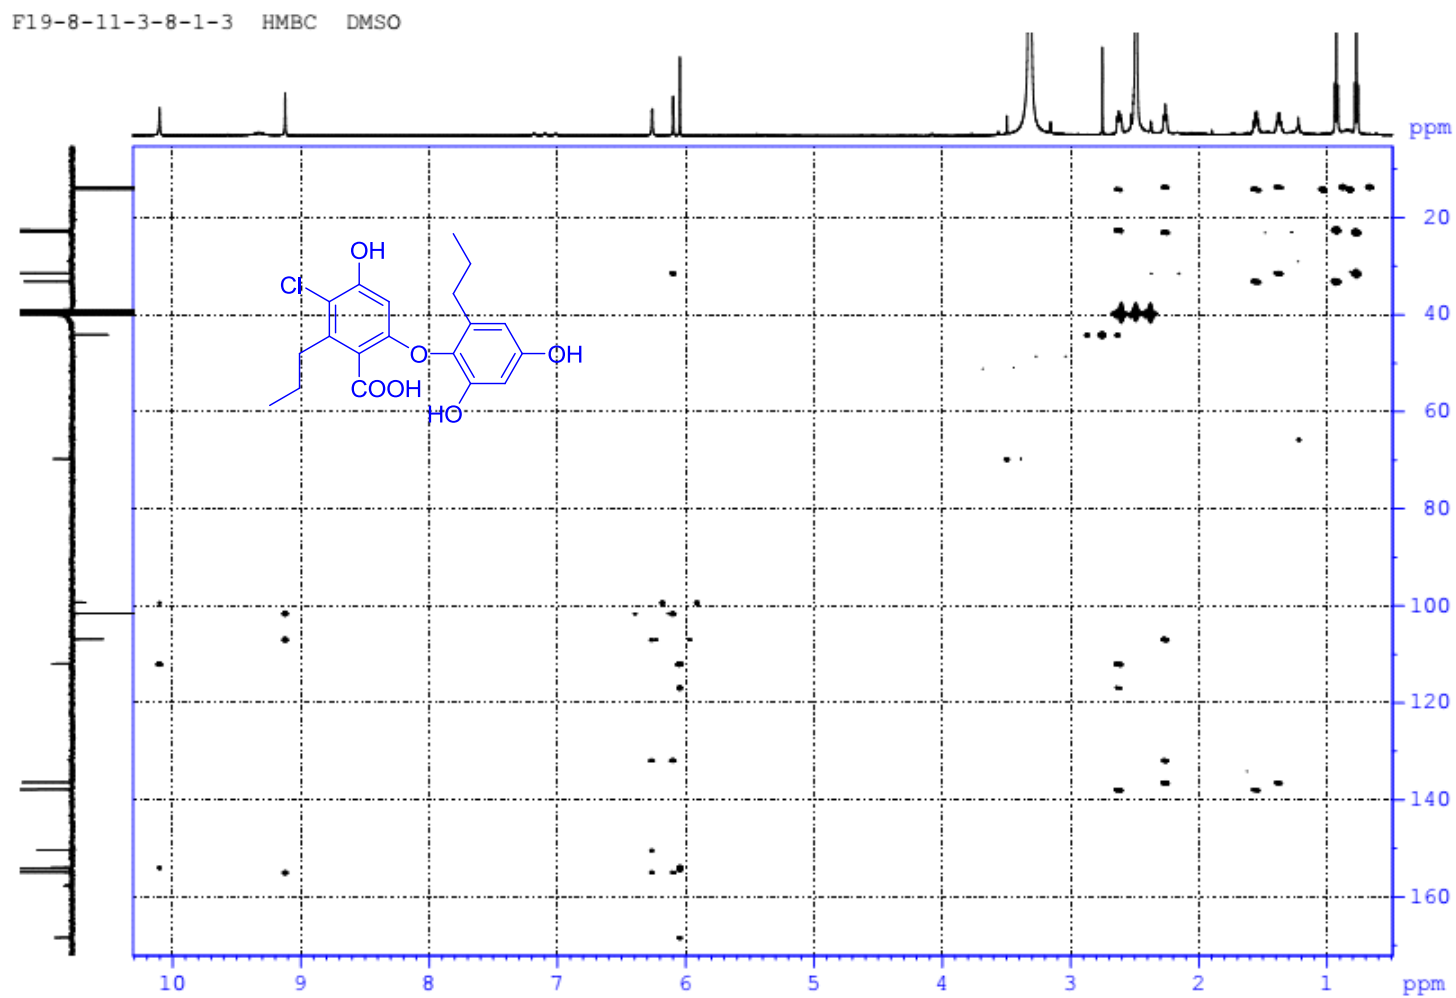

Figure S44. HMBC spectrum of compound 6 in DMSO-d6.

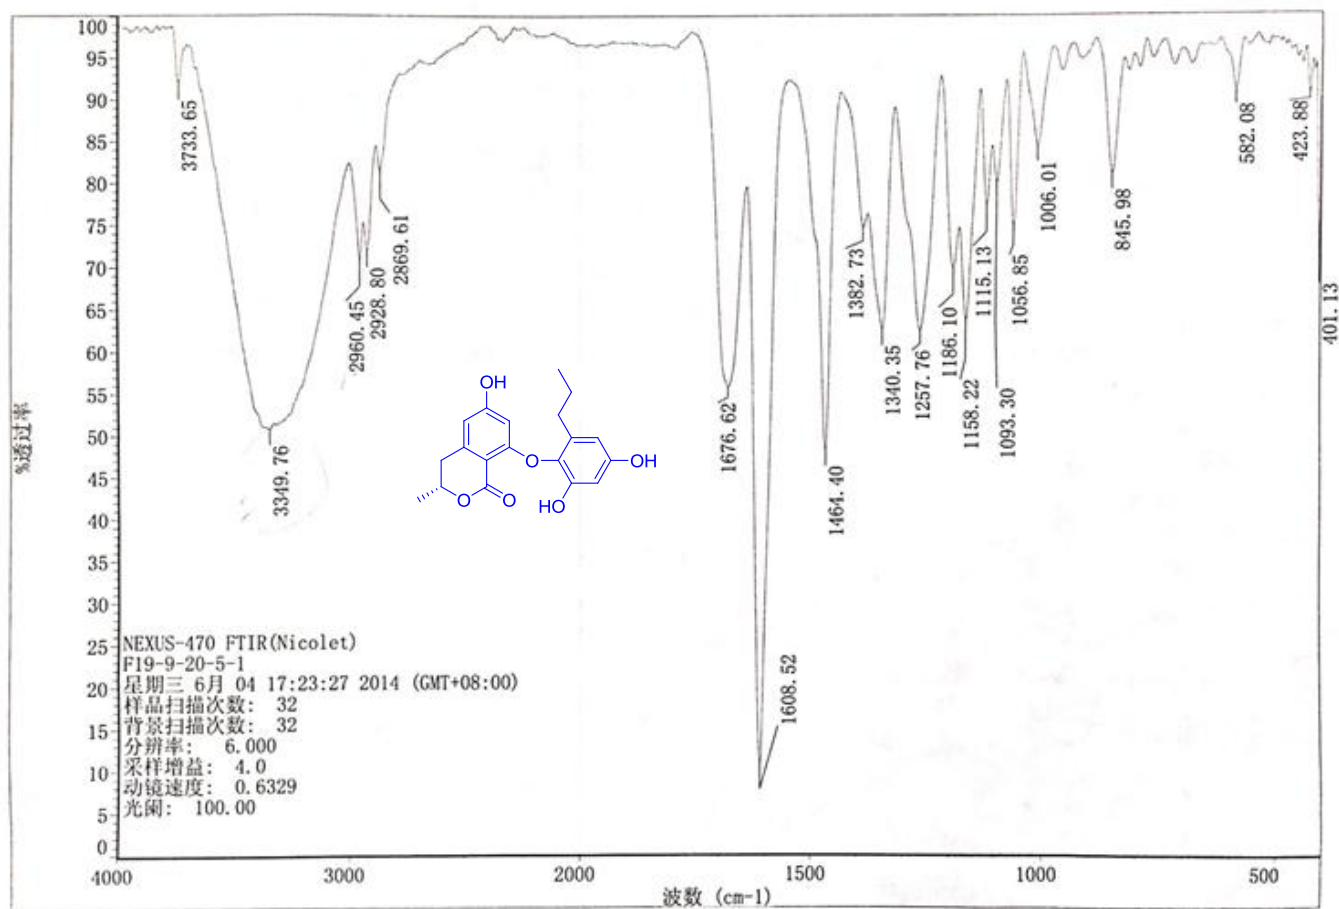

Figure S45. IR spectrum of compound 7.



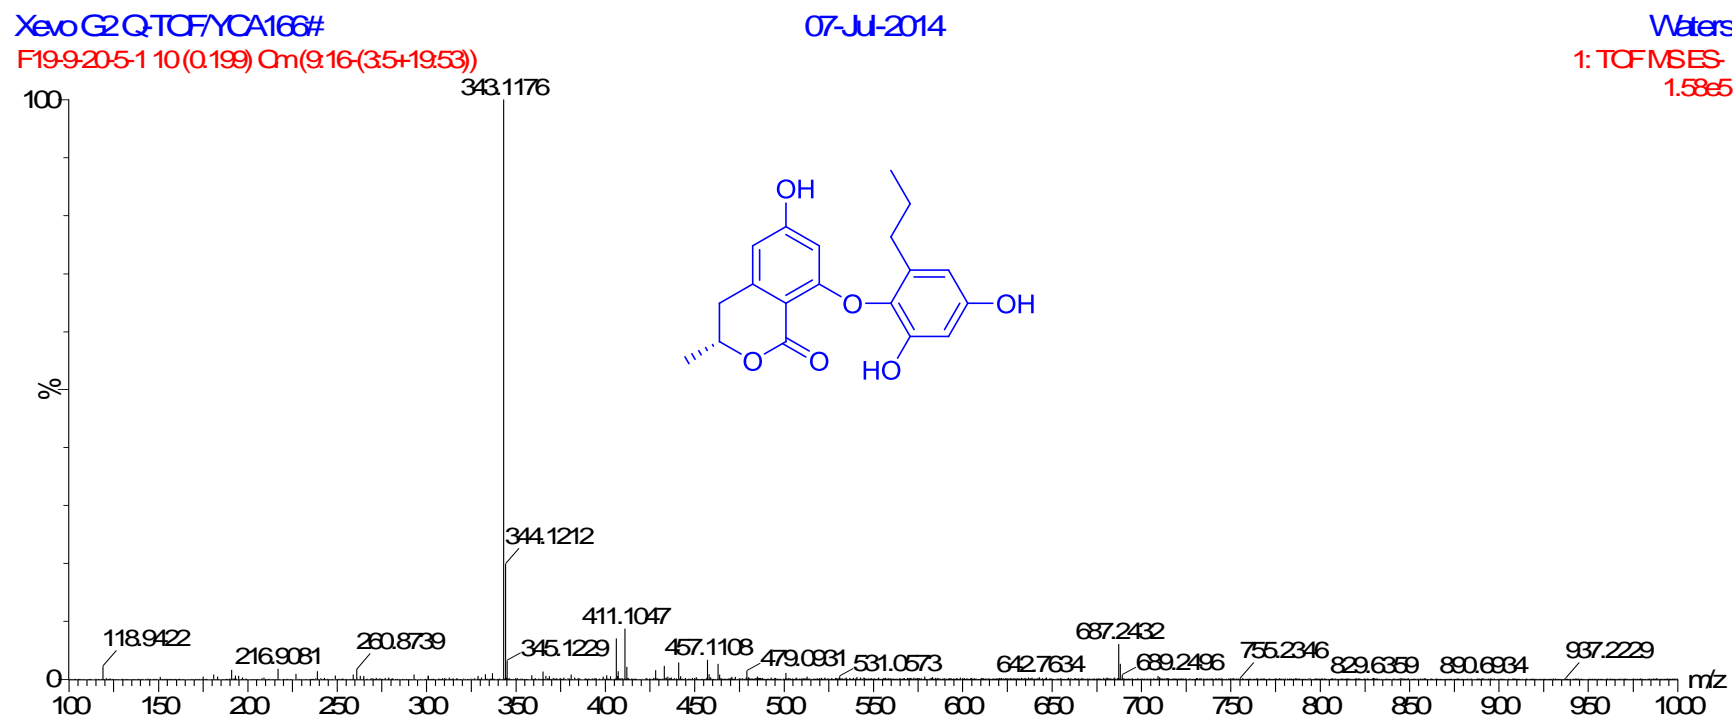

Figure S46. Negative mode HRESIMS data of compound 7.

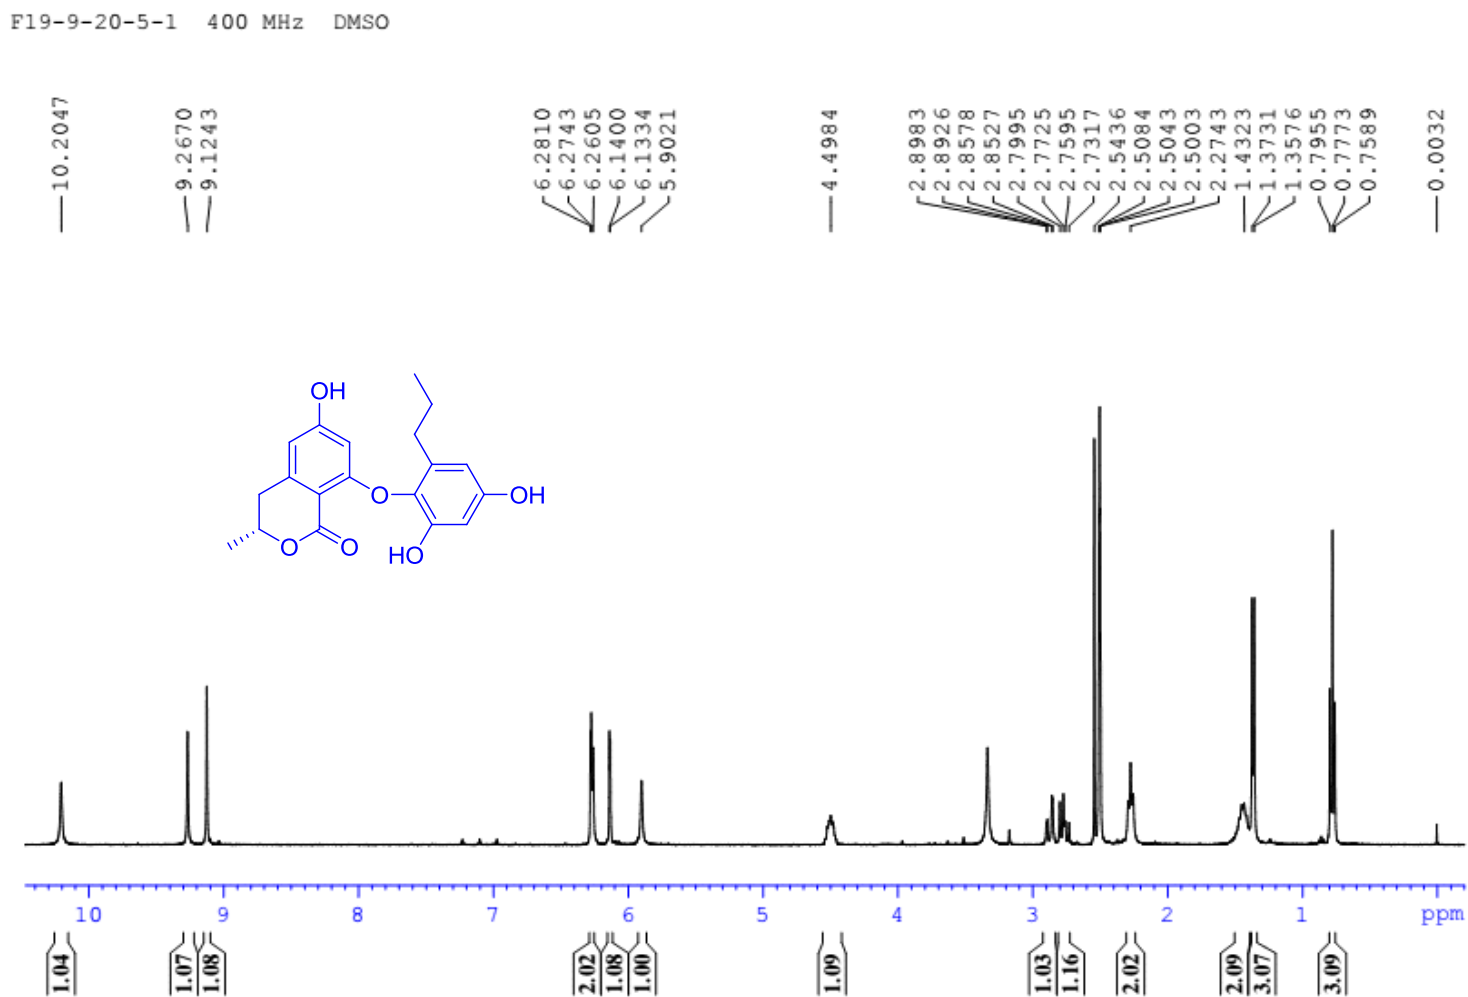

Figure S47.  $^1\text{H}$  NMR spectrum of compound 7 in DMSO- $d_6$  (400 MHz).

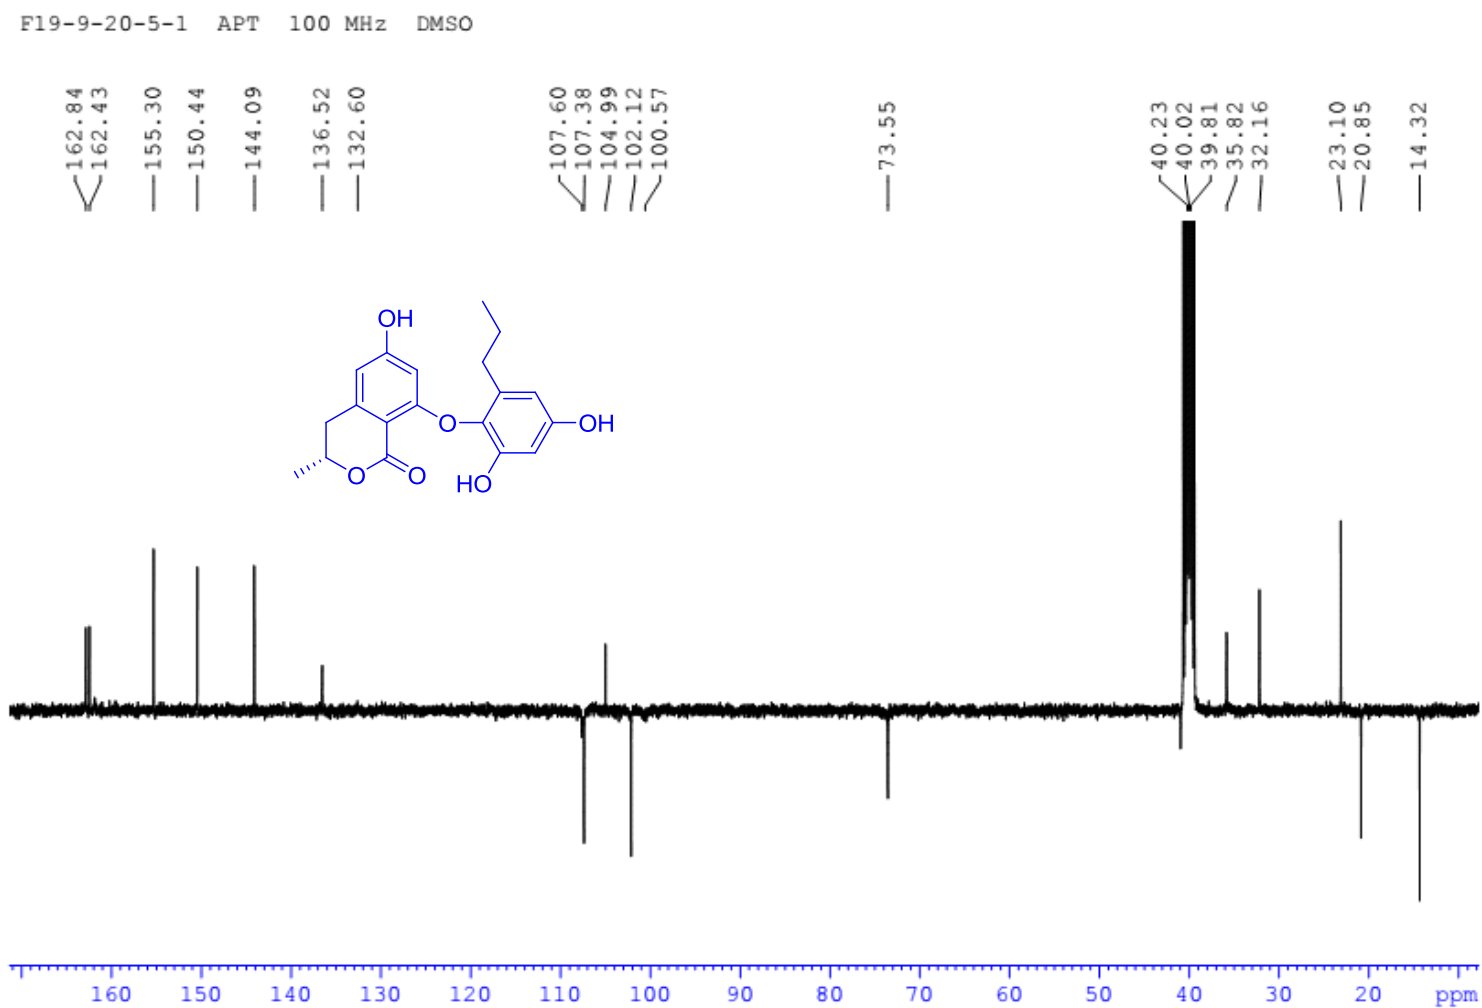

Figure S48.  $^{13}\text{C}$  NMR spectrum of compound 7 in DMSO-d<sub>6</sub> (100 MHz).

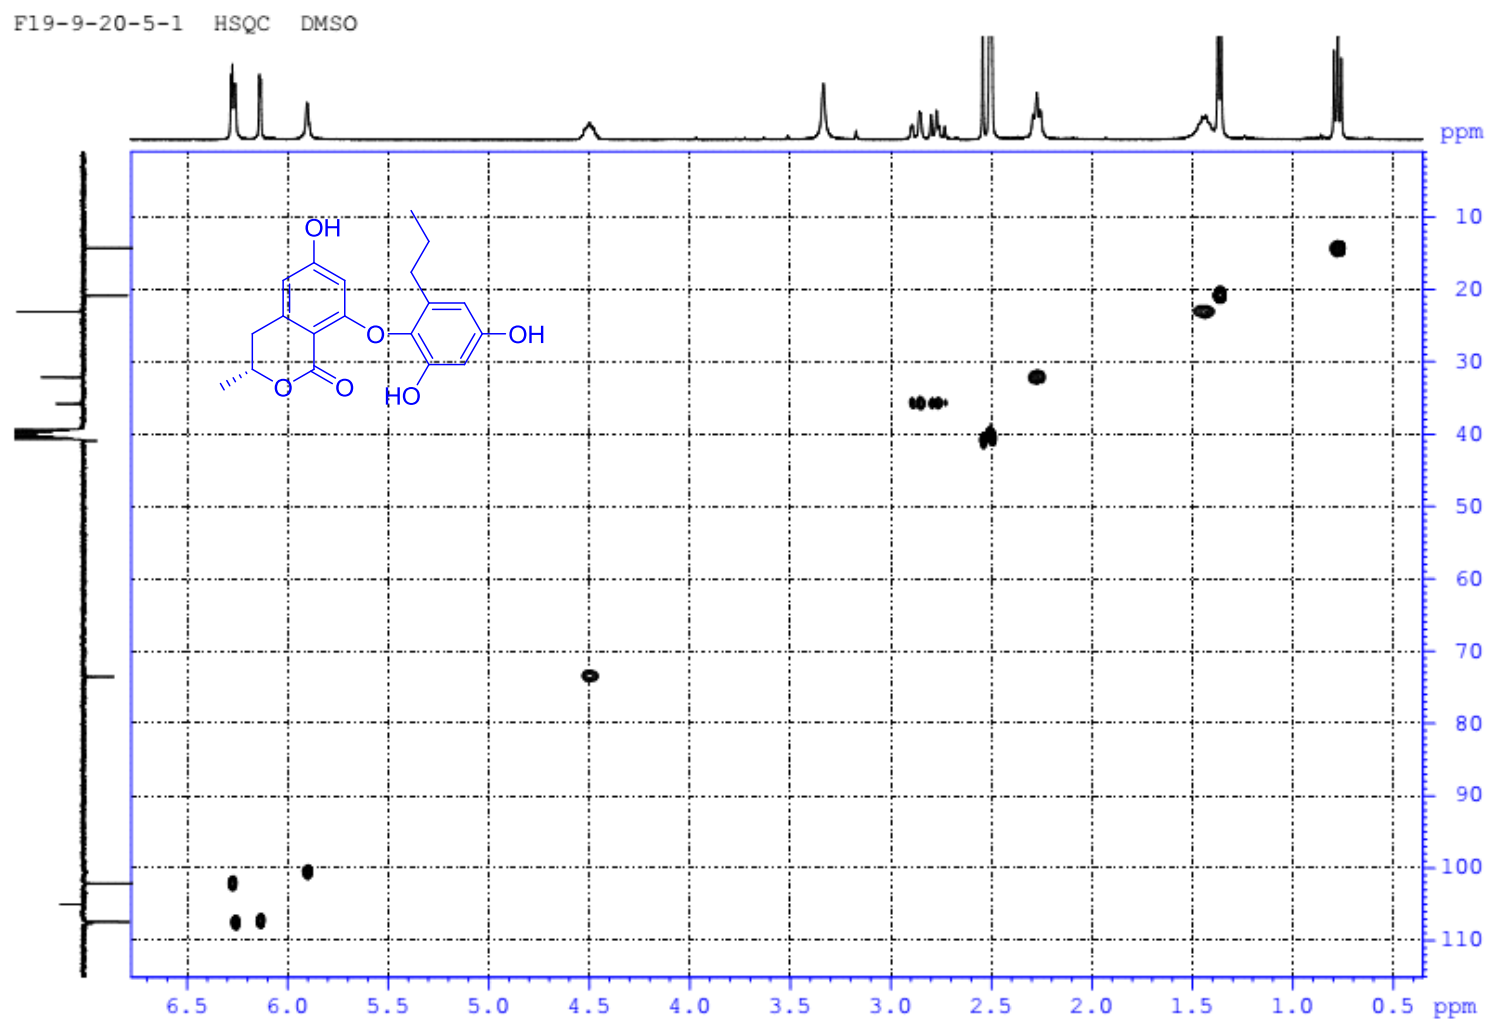

Figure S49. HSQC spectrum of compound 7 in DMSO-d<sub>6</sub>.

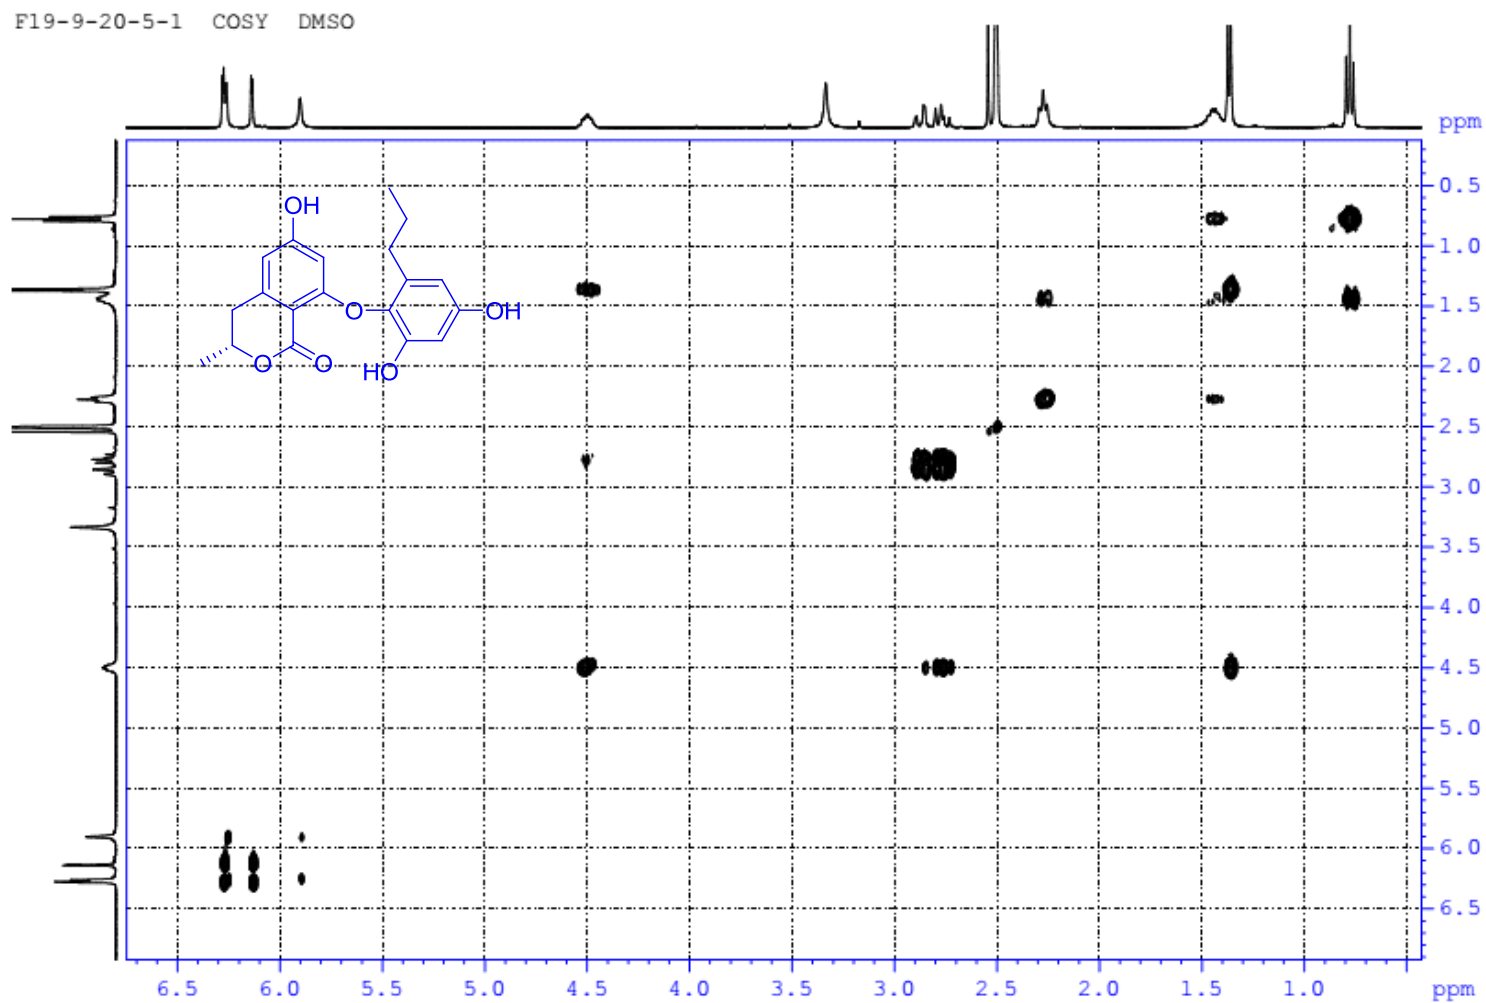

Figure S50. <sup>1</sup>H-<sup>1</sup>H COSY spectrum of compound 7 in DMSO-d<sub>6</sub>.

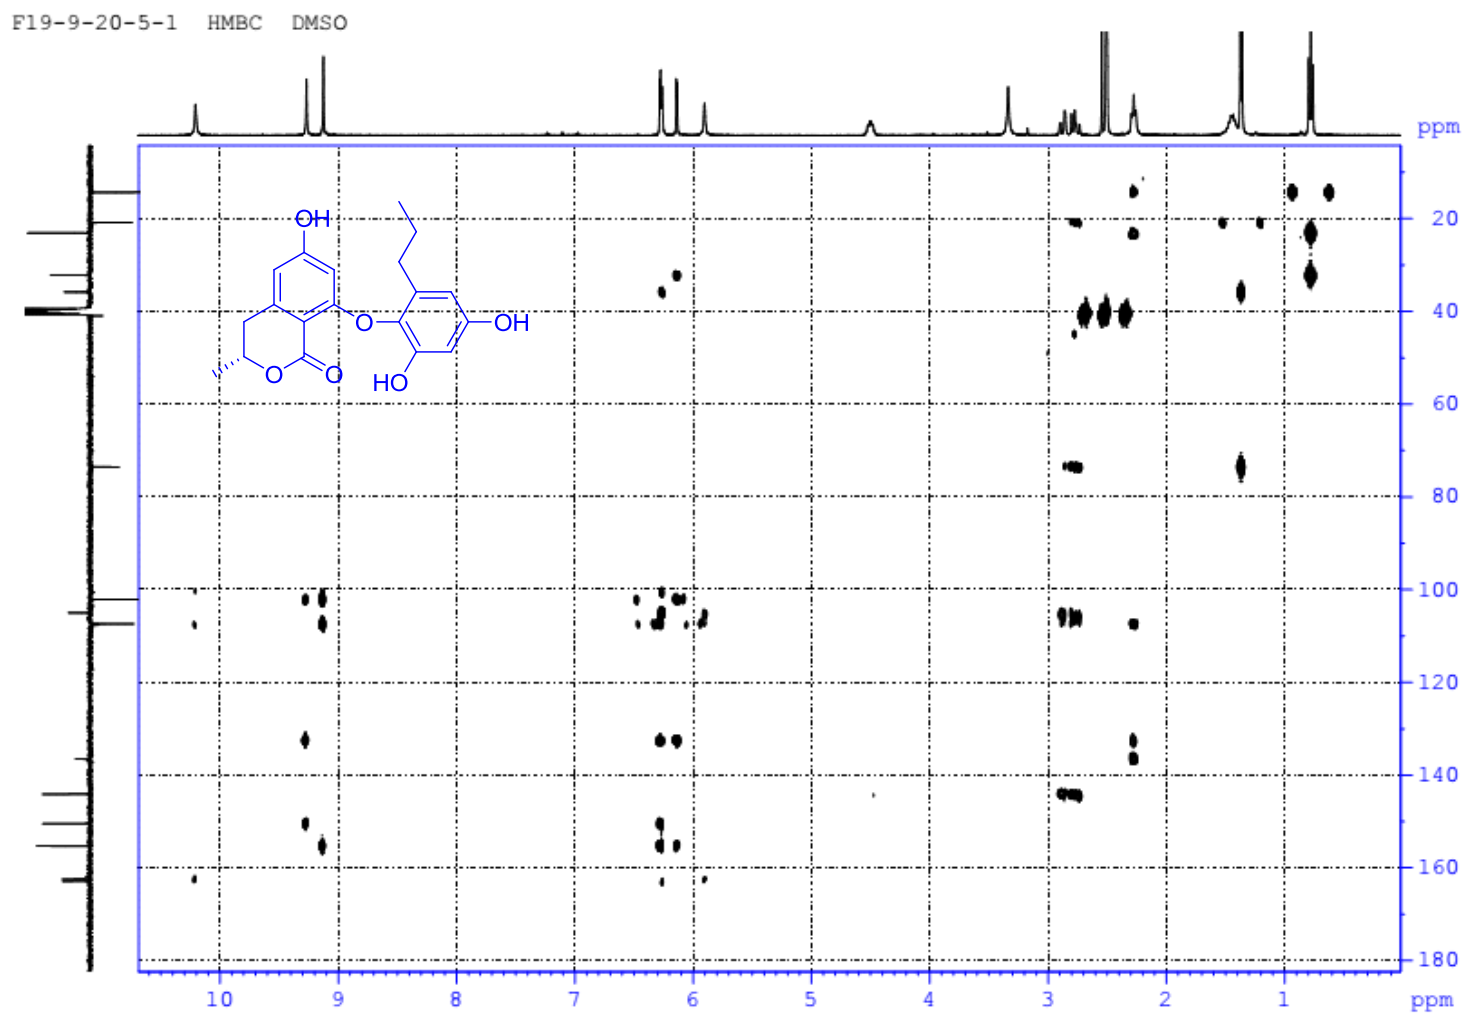

Figure S51. HMBC spectrum of compound 7 in DMSO-d<sub>6</sub>.

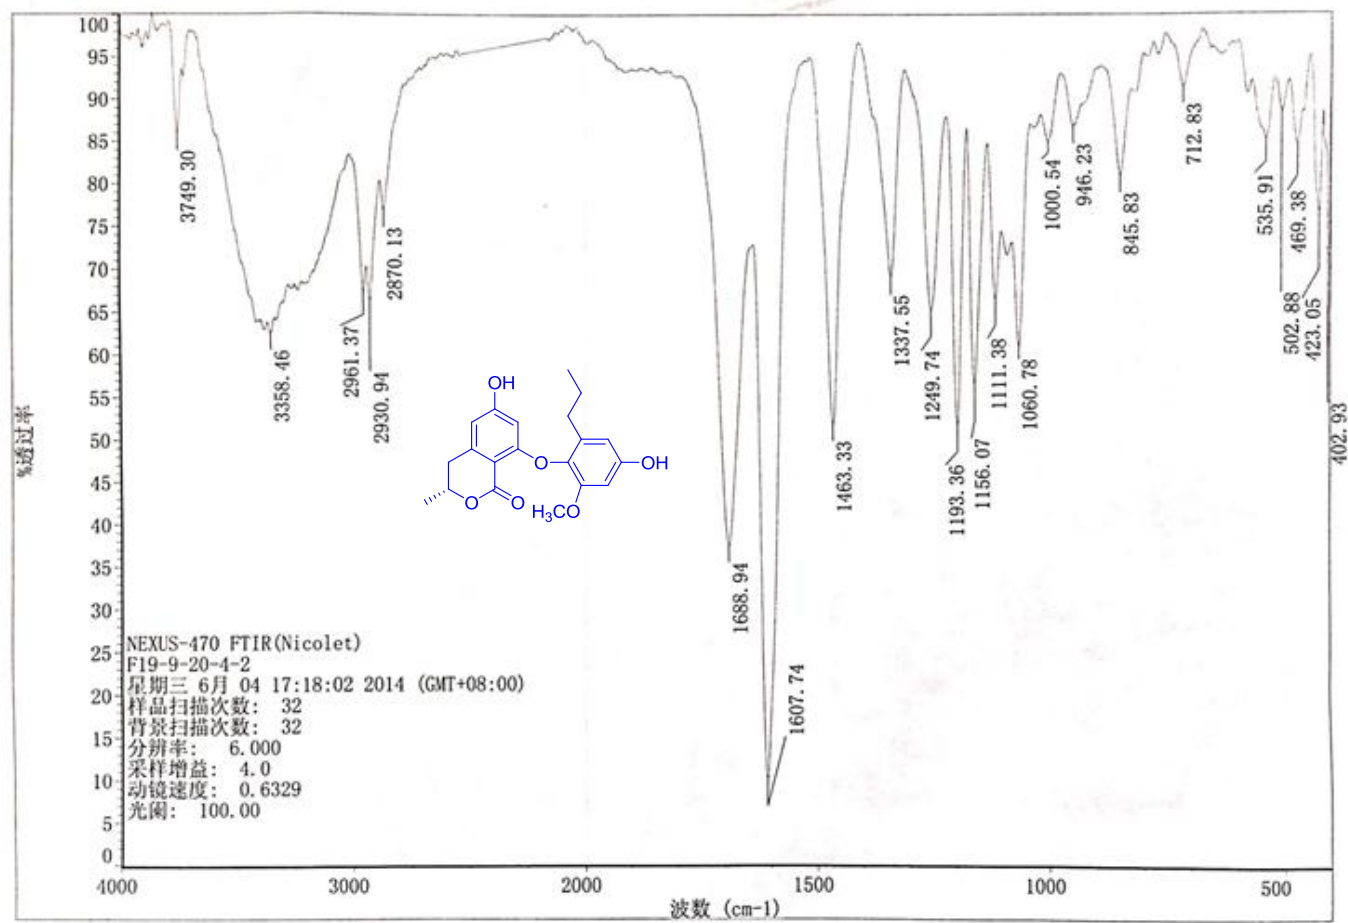

Figure S52. IR spectrum of compound 8.

Xevo G2 Q-TOF/YCA166#

07-JU-2014

Waters

F19-9-20-4-2 10 (0.199) Cm (10:19-(36+21:53))

1: TOF MS ES-  
280.4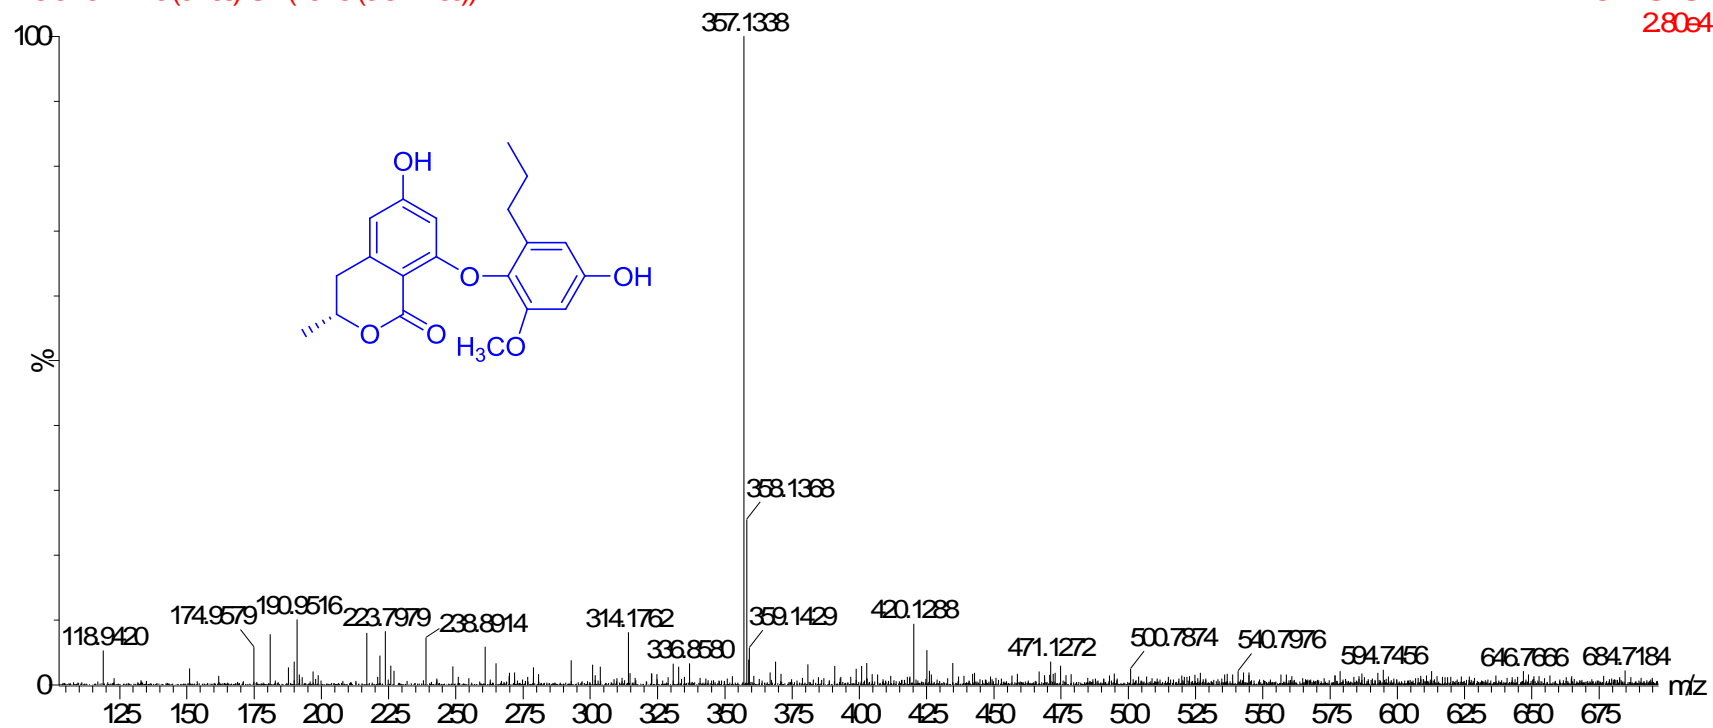

Figure S53. Negative mode HRESIMS data of compound 8.



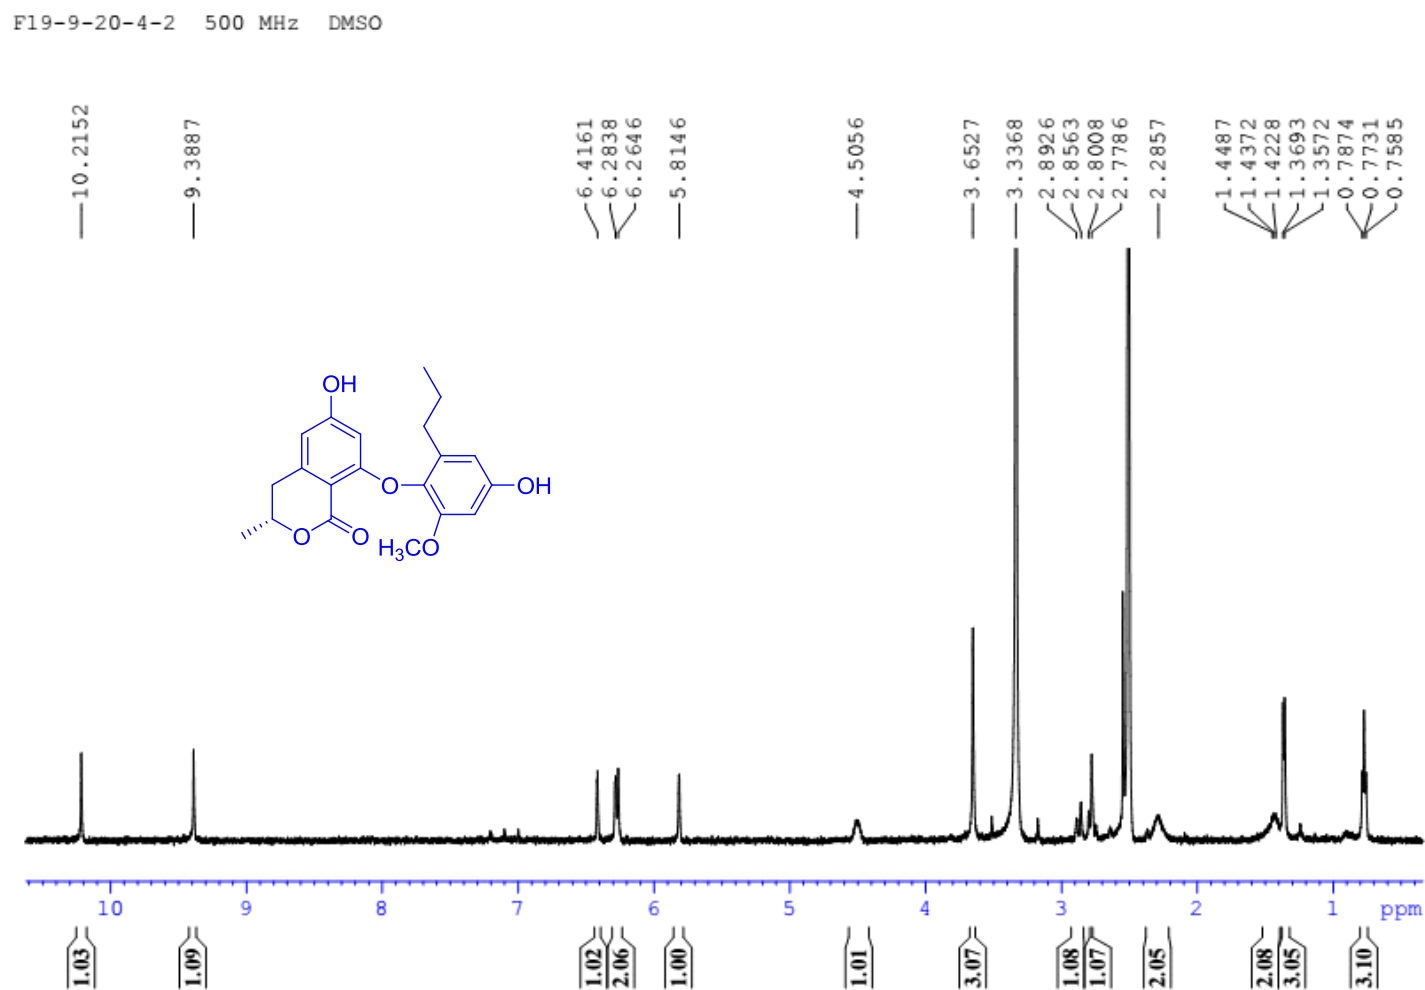

Figure S54.  $^1\text{H}$  NMR spectrum of compound **8** in DMSO- $d_6$  (500 MHz).

F19-9-20-4-2 APT 125 MHz DMSO

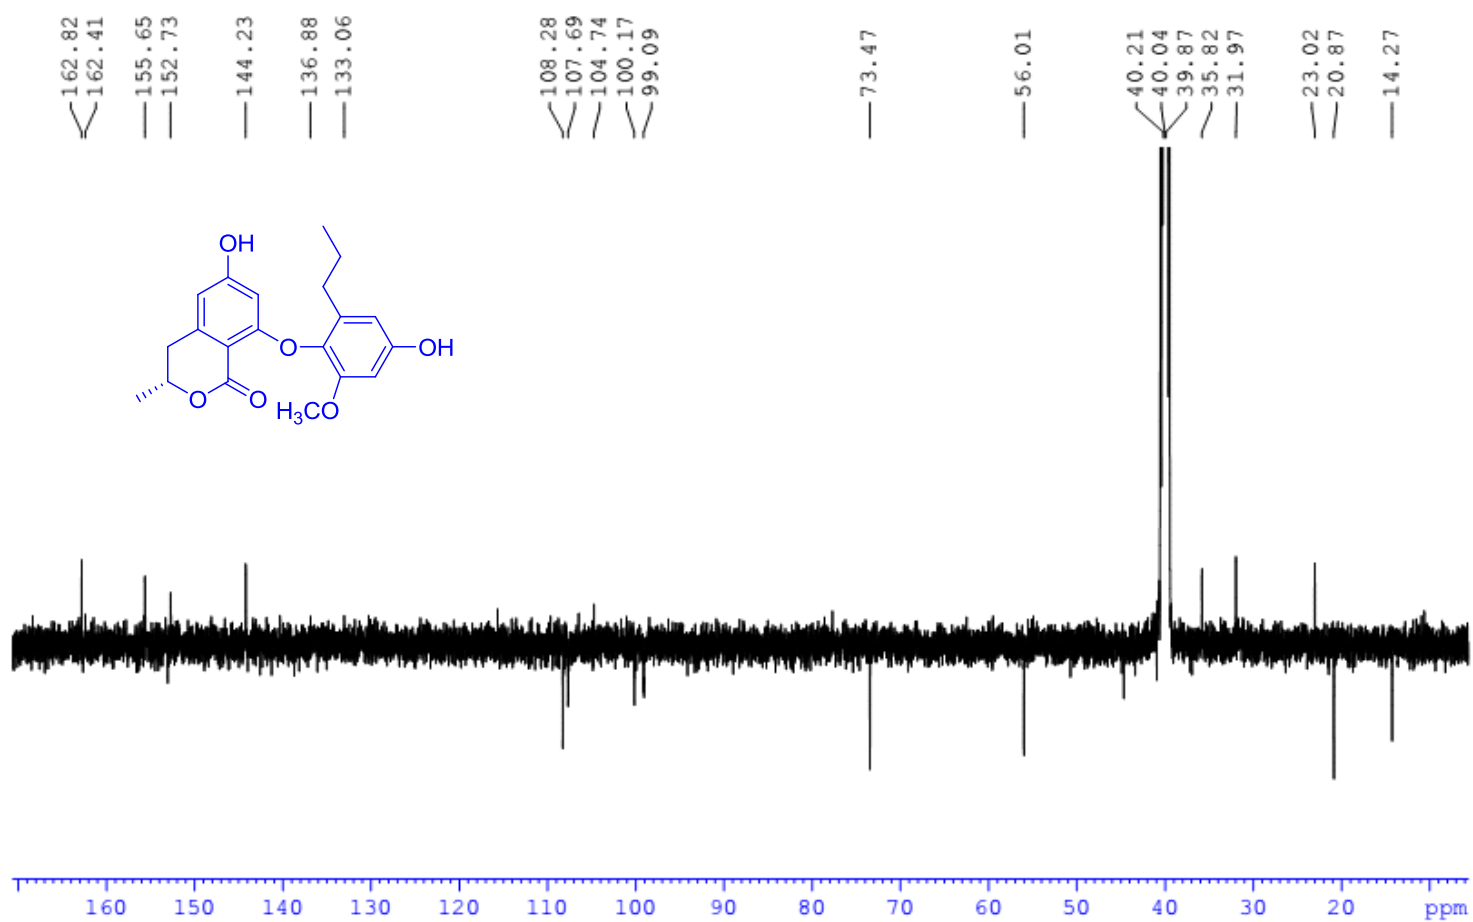

Figure S55. <sup>13</sup>C NMR spectrum of compound 8 in DMSO-d<sub>6</sub> (125 MHz).

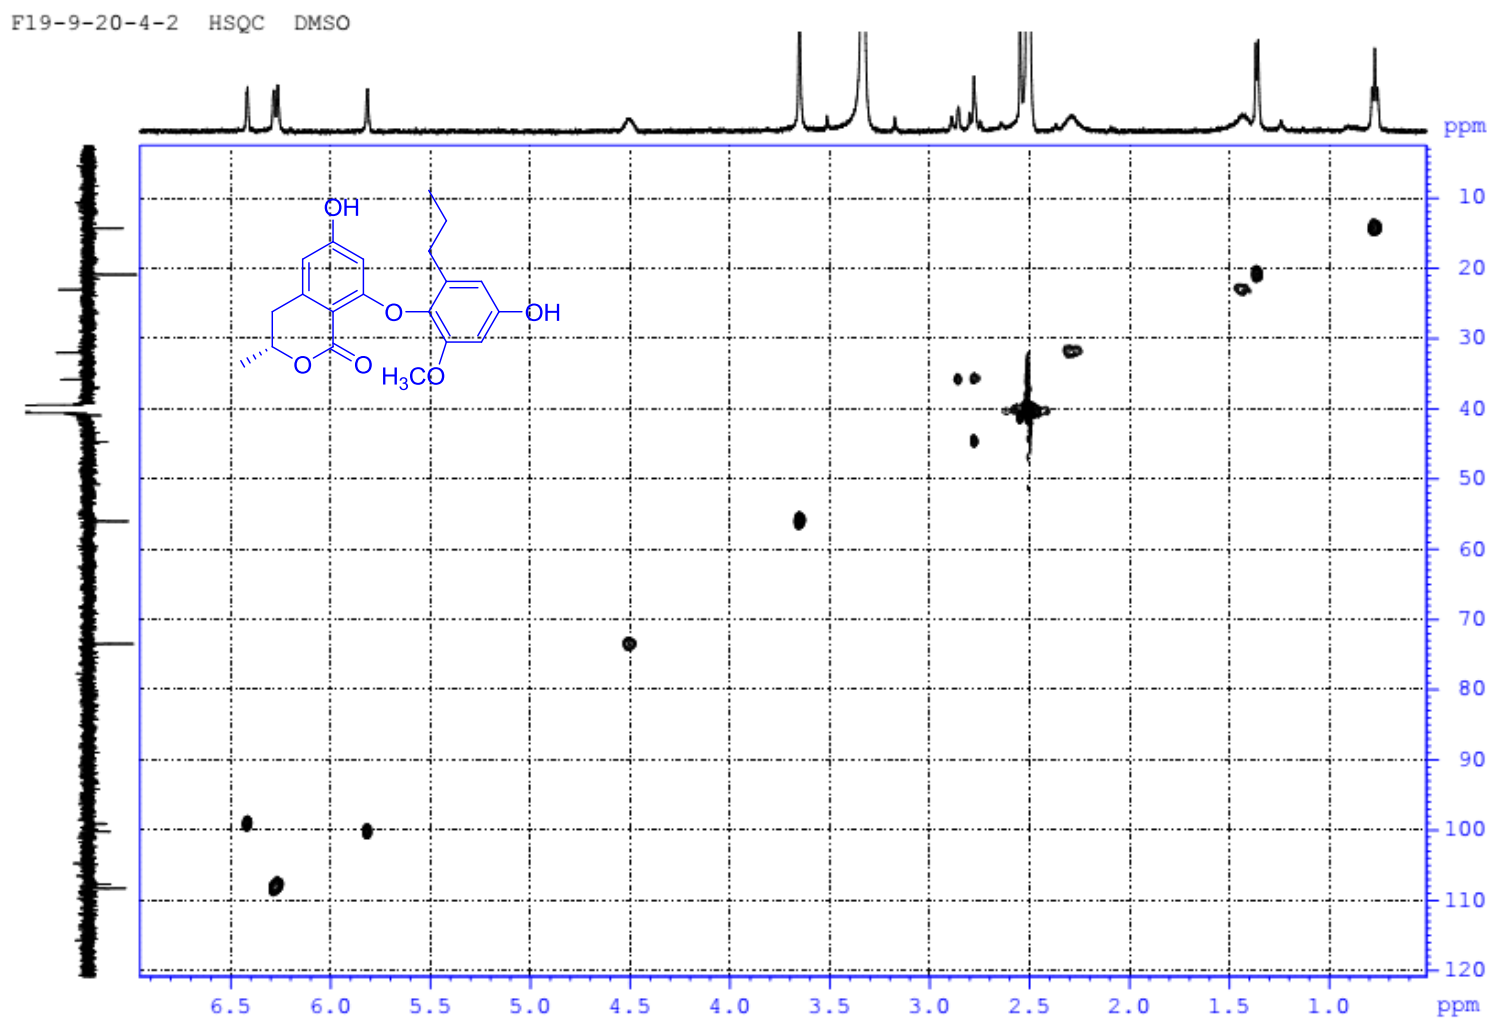

**Figure S56.** HSQC spectrum of compound **8** in DMSO-d<sub>6</sub>.

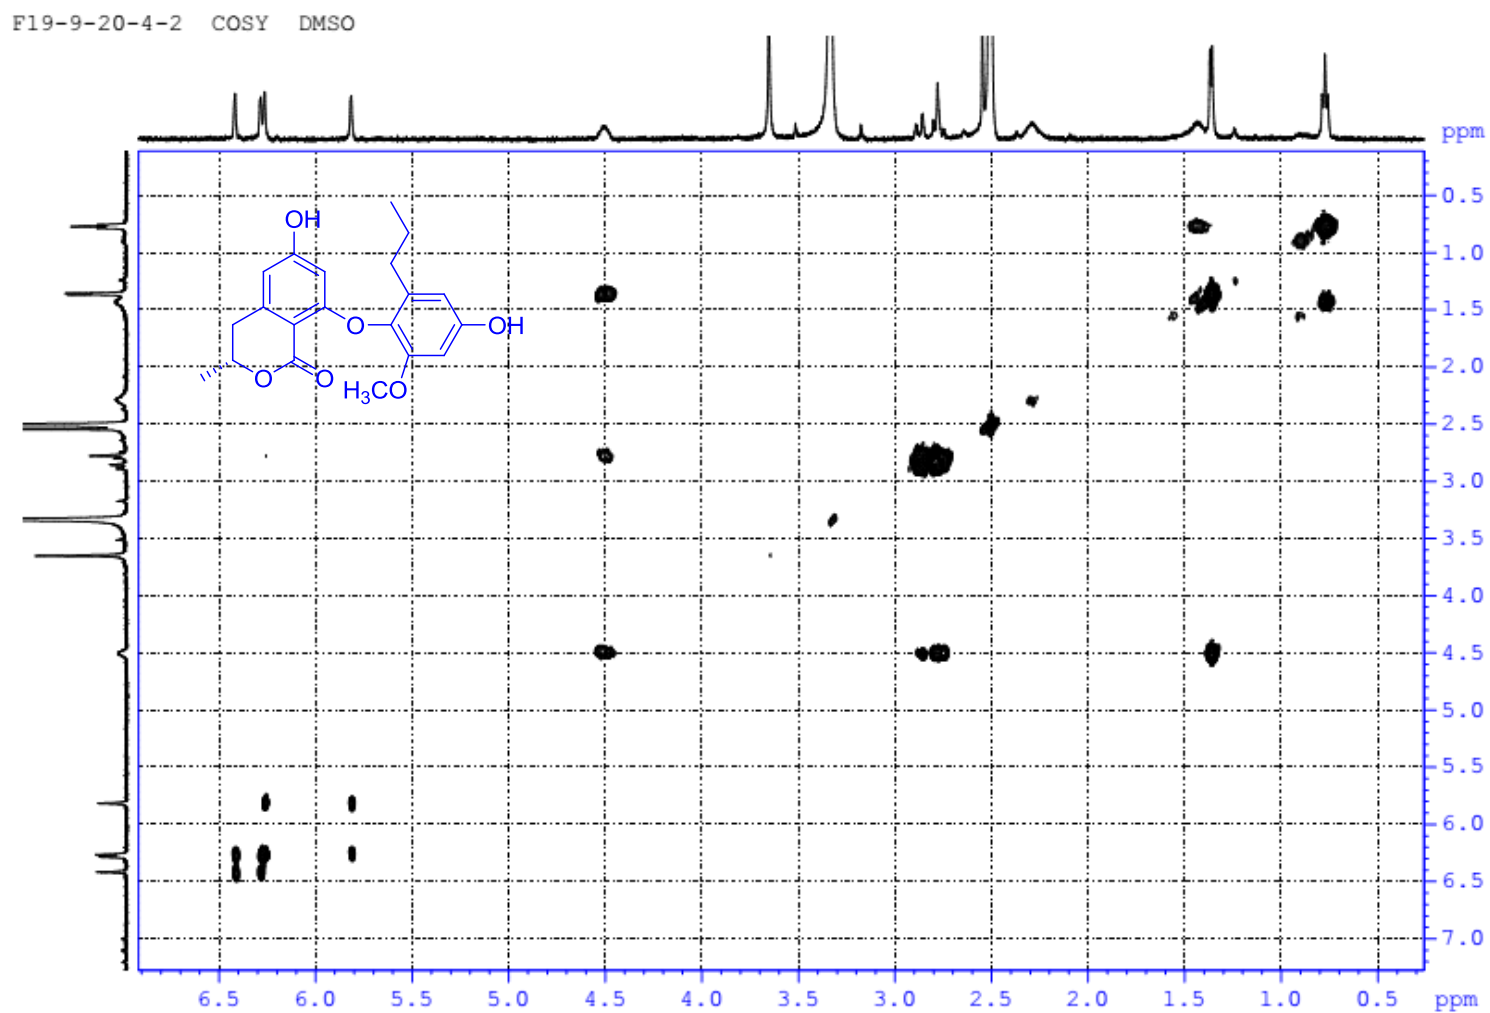

Figure S57.  $^1\text{H}$ - $^1\text{H}$  COSY spectrum of compound 8 in DMSO- $d_6$ .

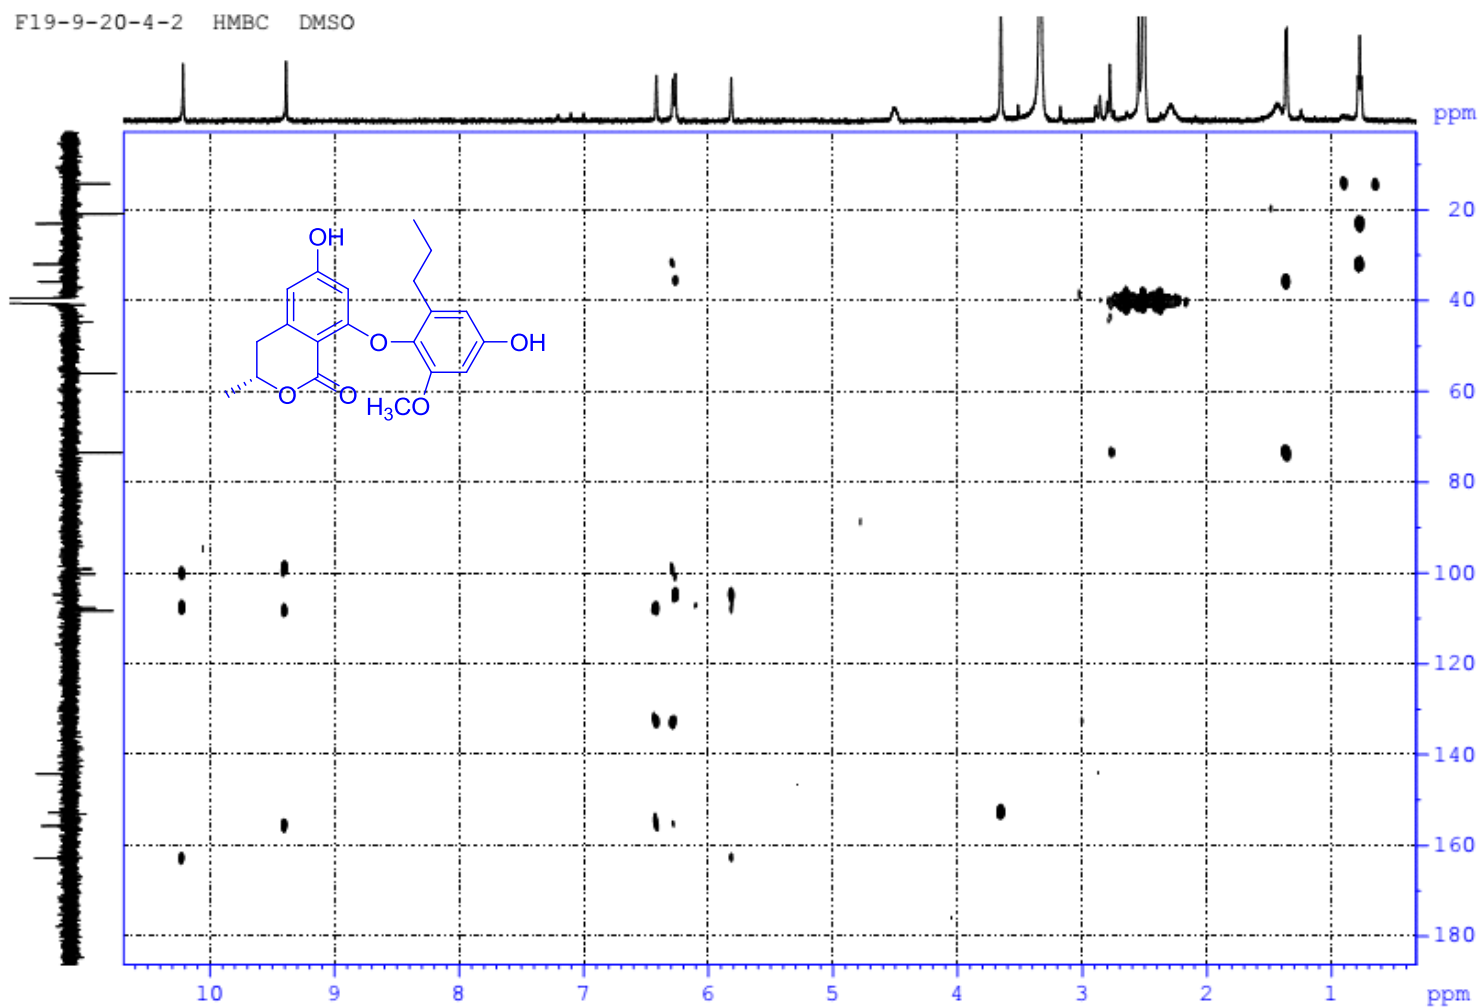

Figure S58. HMBC spectrum of compound 8 in DMSO-d<sub>6</sub>.

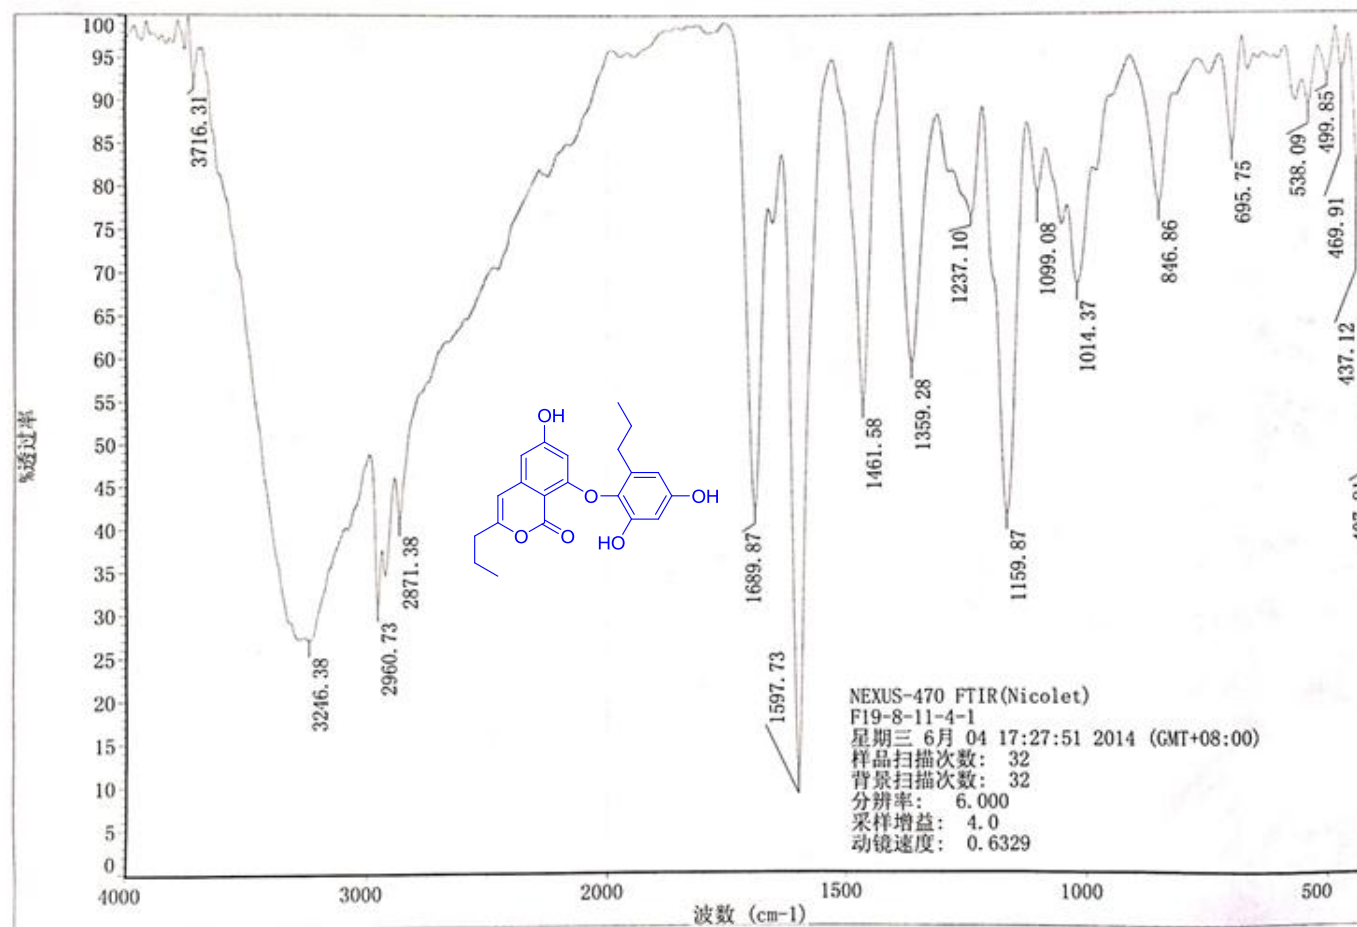

Figure S59. IR spectrum of compound 9.

Xevo G2 Q.TOF/YCA166#

07-Jul-2014

Waters

F198-11-4-1 10(0.199) Cm(10:16-(36+24:54))

1: TCFMSES  
7.95e4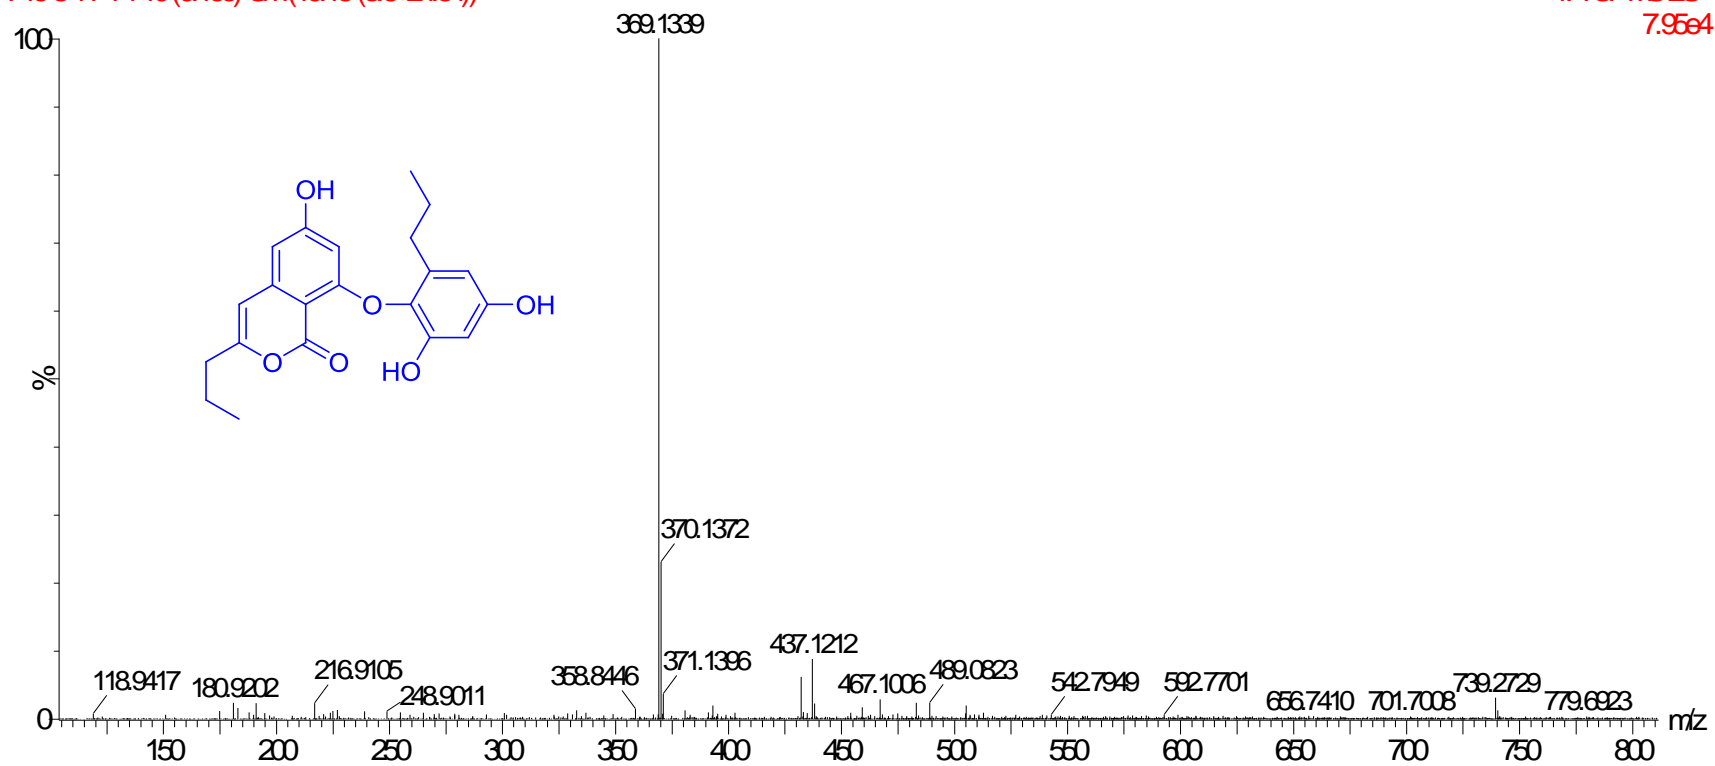

Figure S60. Negative mode HRESIMS data of compound 9.

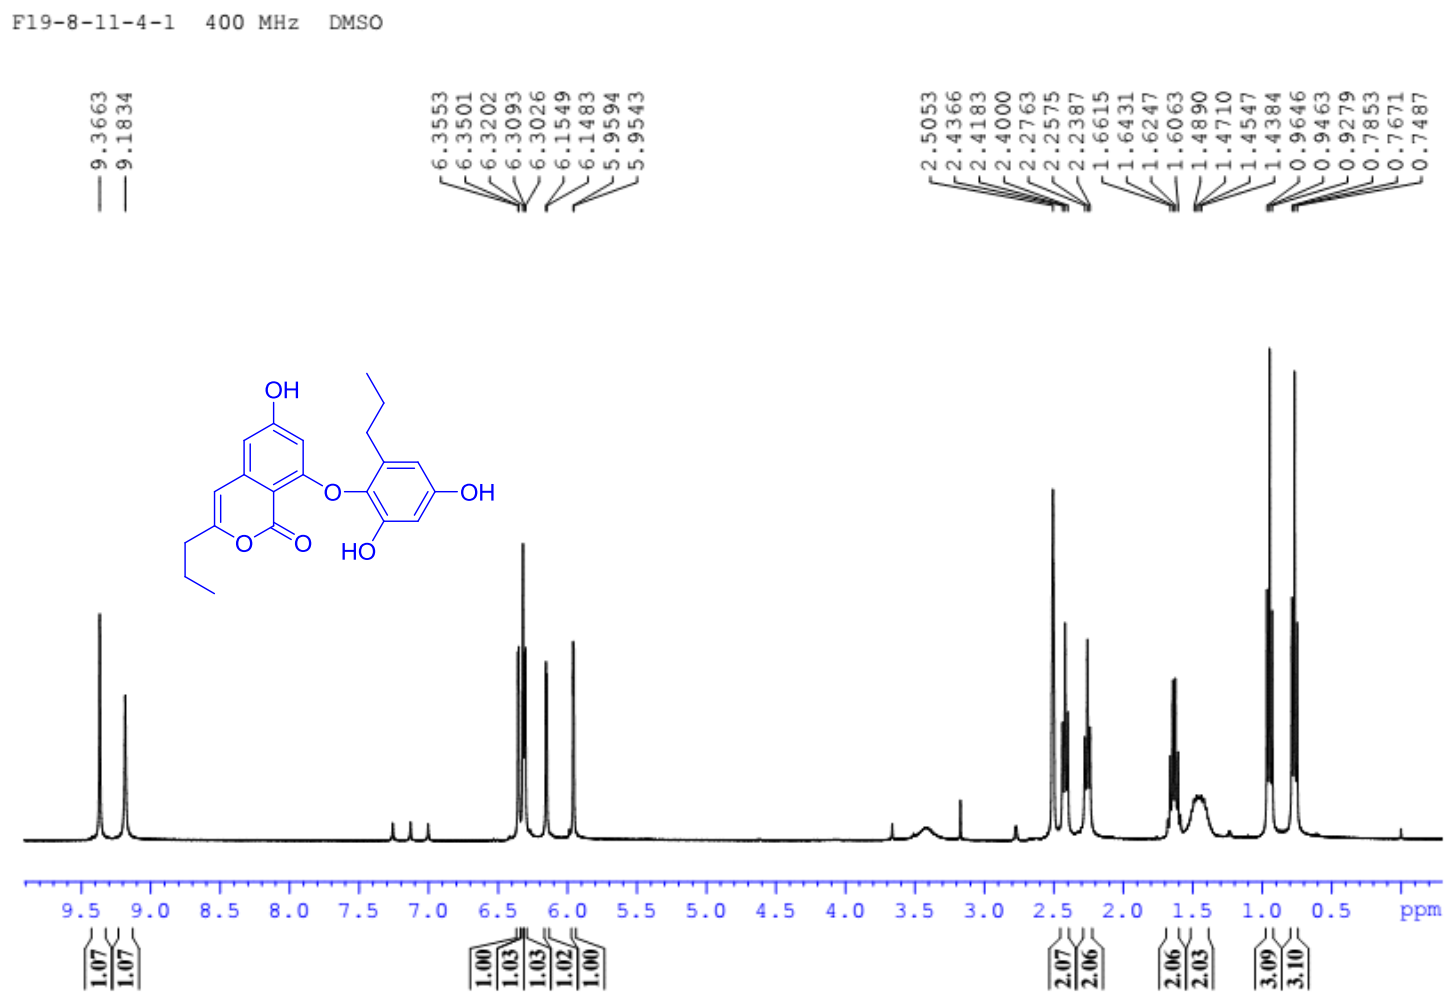

**Figure S61.**  $^1\text{H}$  NMR spectrum of compound **9** in DMSO- $d_6$  (400 MHz).



F19-8-11-4-1 APT 100 MHz DMSO

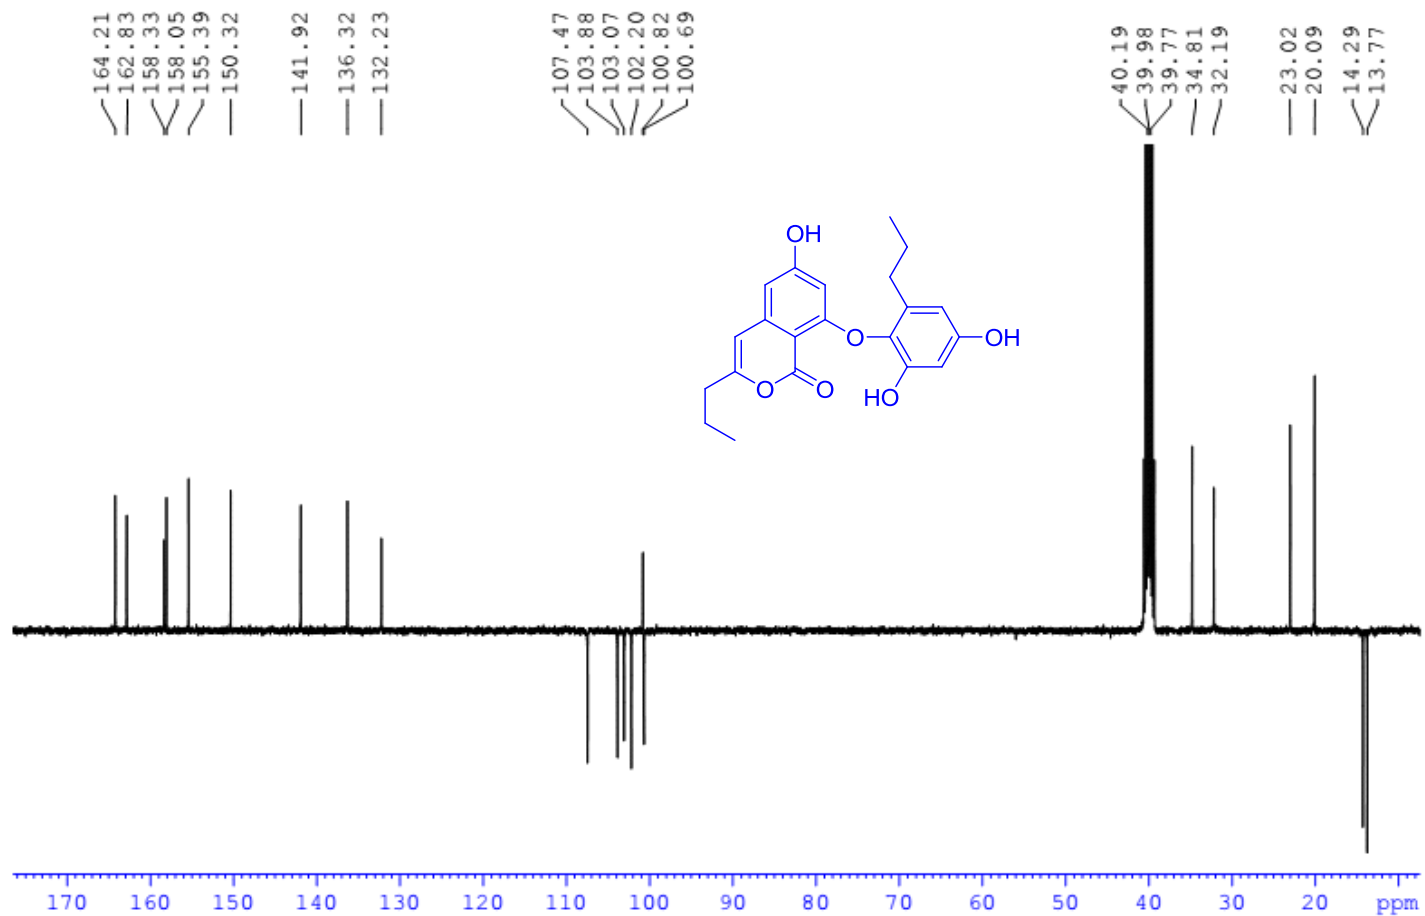

**Figure S62.** <sup>13</sup>C NMR spectrum of compound 9 in DMSO-d<sub>6</sub> (100 MHz).

F19-8-11-4-1 HSQC DMSO

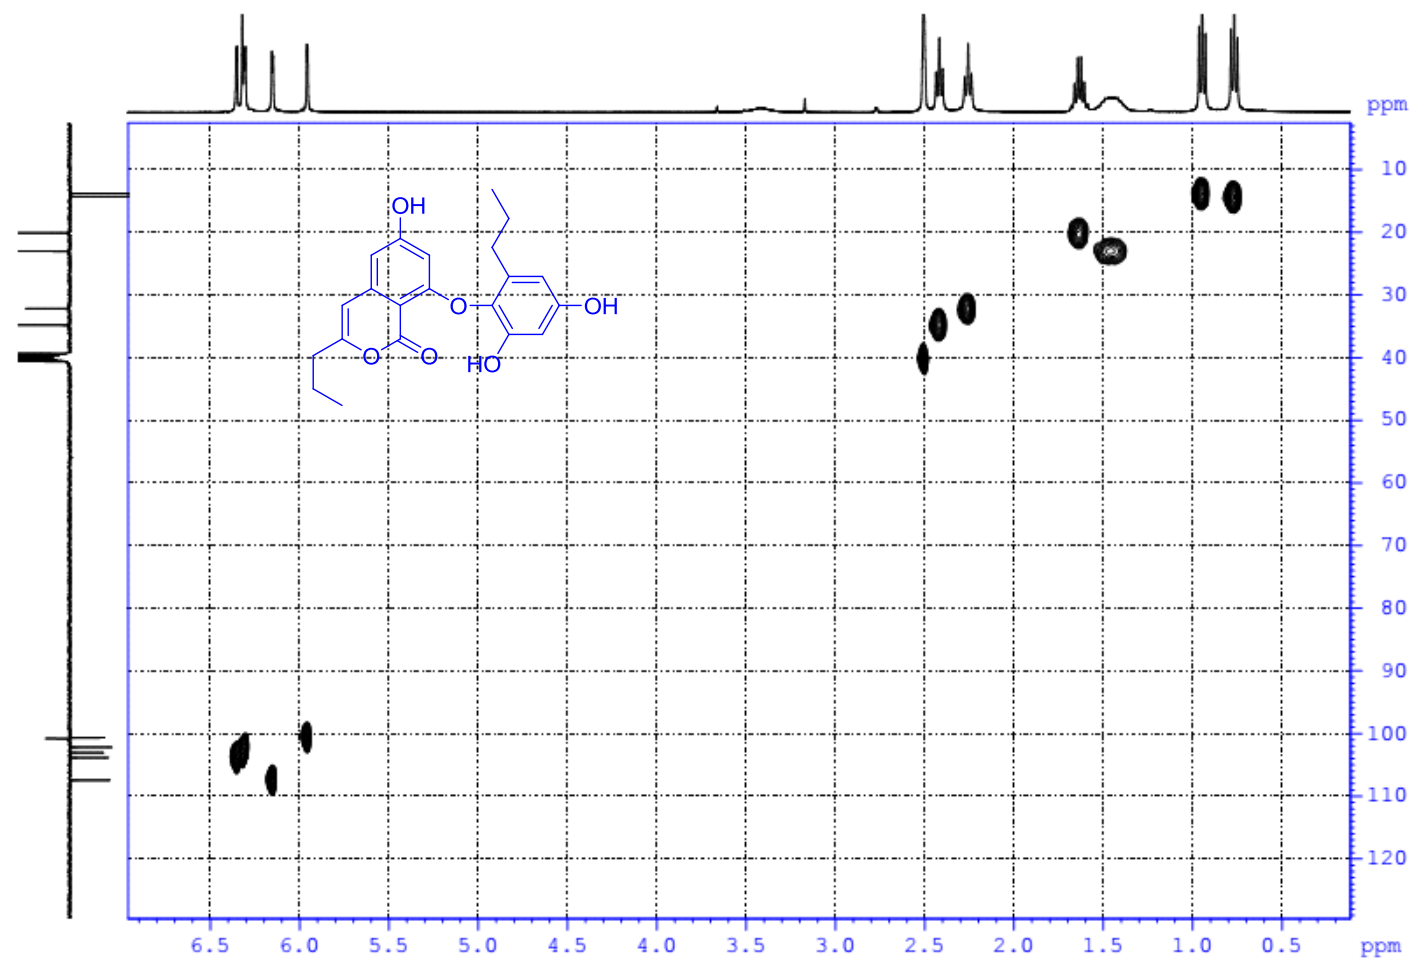

**Figure S63.** HSQC spectrum of compound **9** in DMSO-d<sub>6</sub>.

F19-8-11-4-1 COSY DMSO

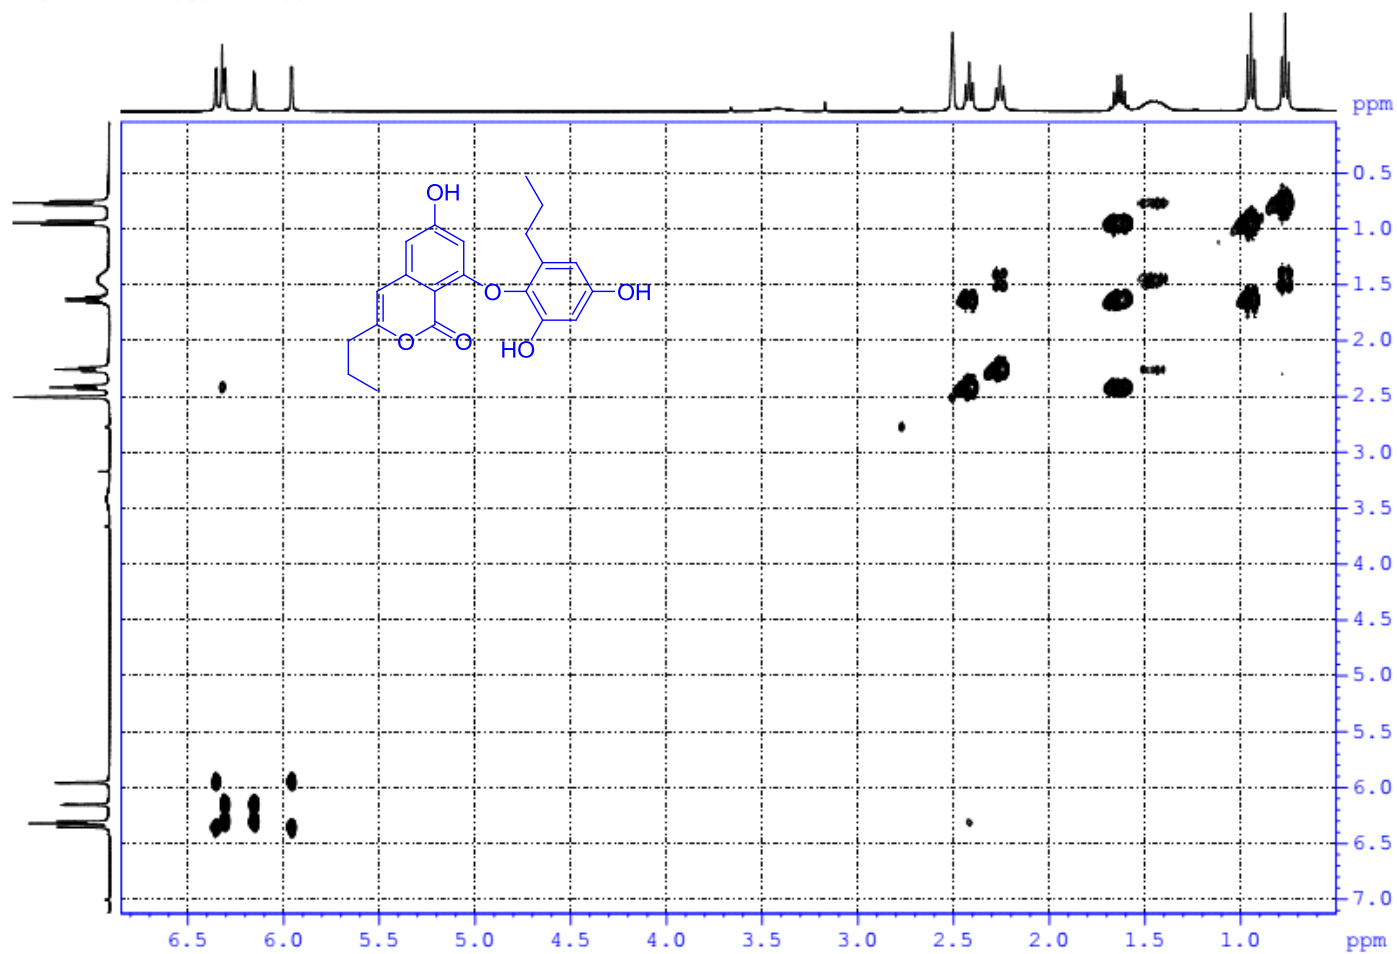

**Figure S64.**  $^1\text{H}$ - $^1\text{H}$  COSY spectrum of compound **9** in DMSO- $d_6$ .

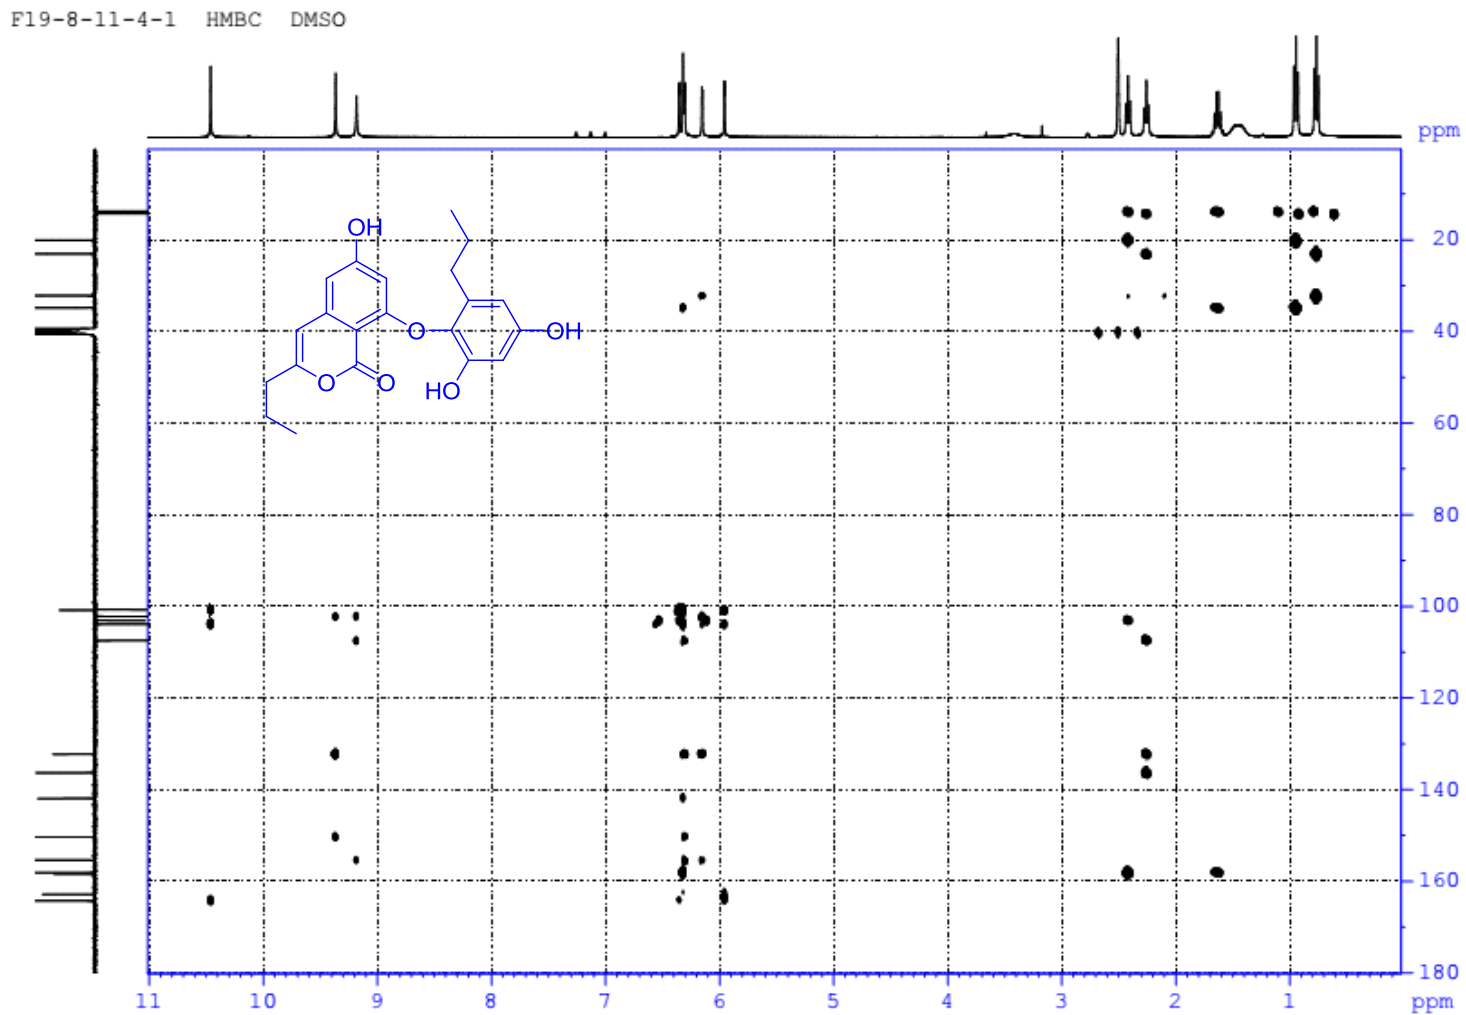

Figure S65. HMBC spectrum of compound 9 in DMSO-d<sub>6</sub>.

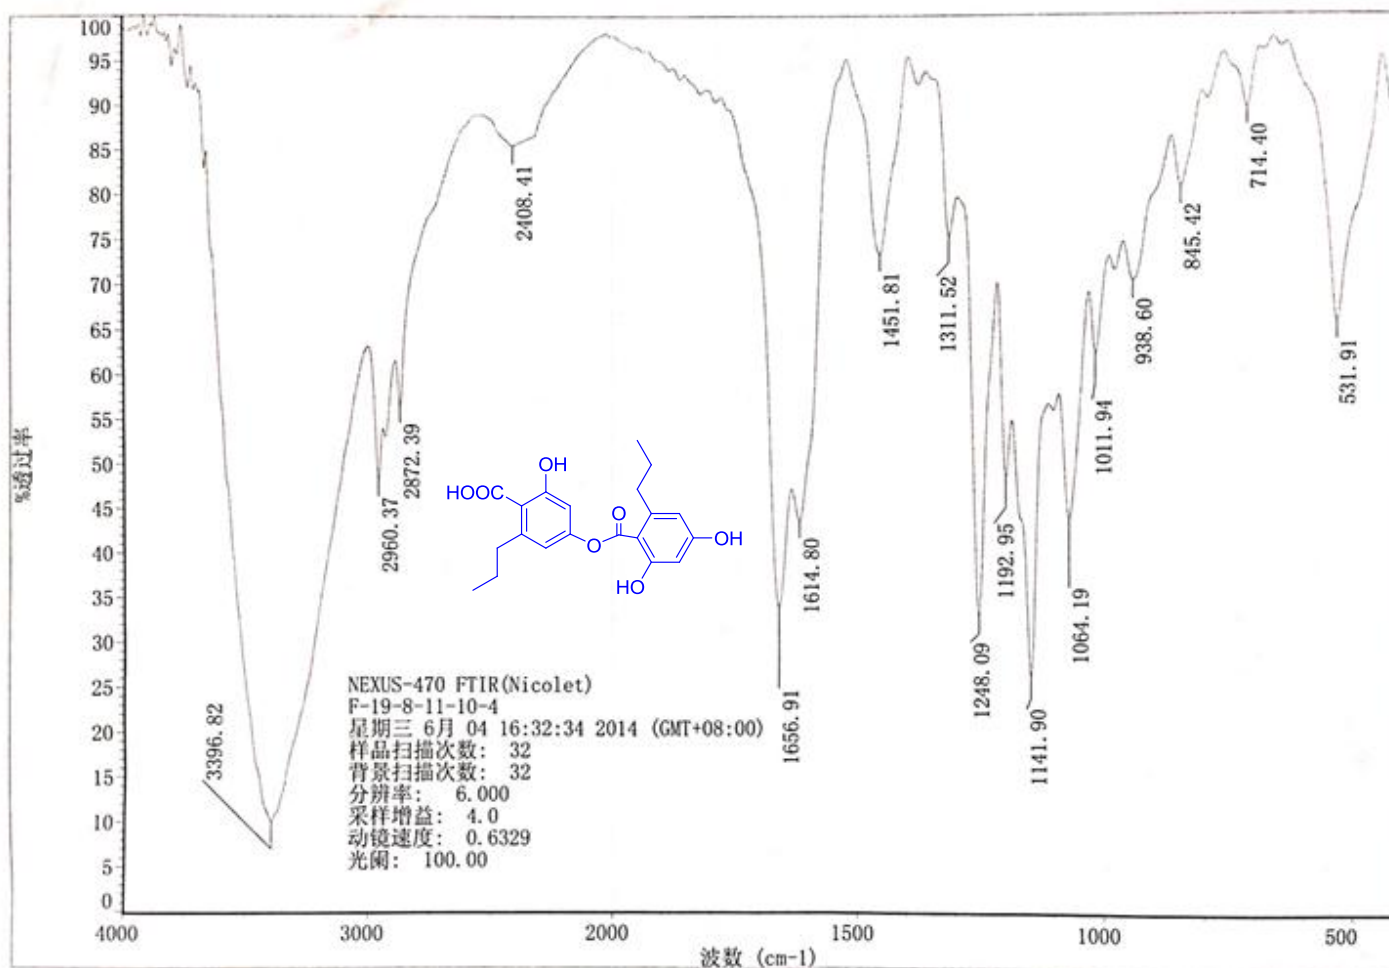

Figure S66. IR spectrum of compound 10.

Xevo G2 Q-TOF/CA166#

07-JU-2014

Waters

F19-8-11-10-4 11 (0.216) Cm(11:16-(48+20.50))

1: TOFMS ES-  
247e5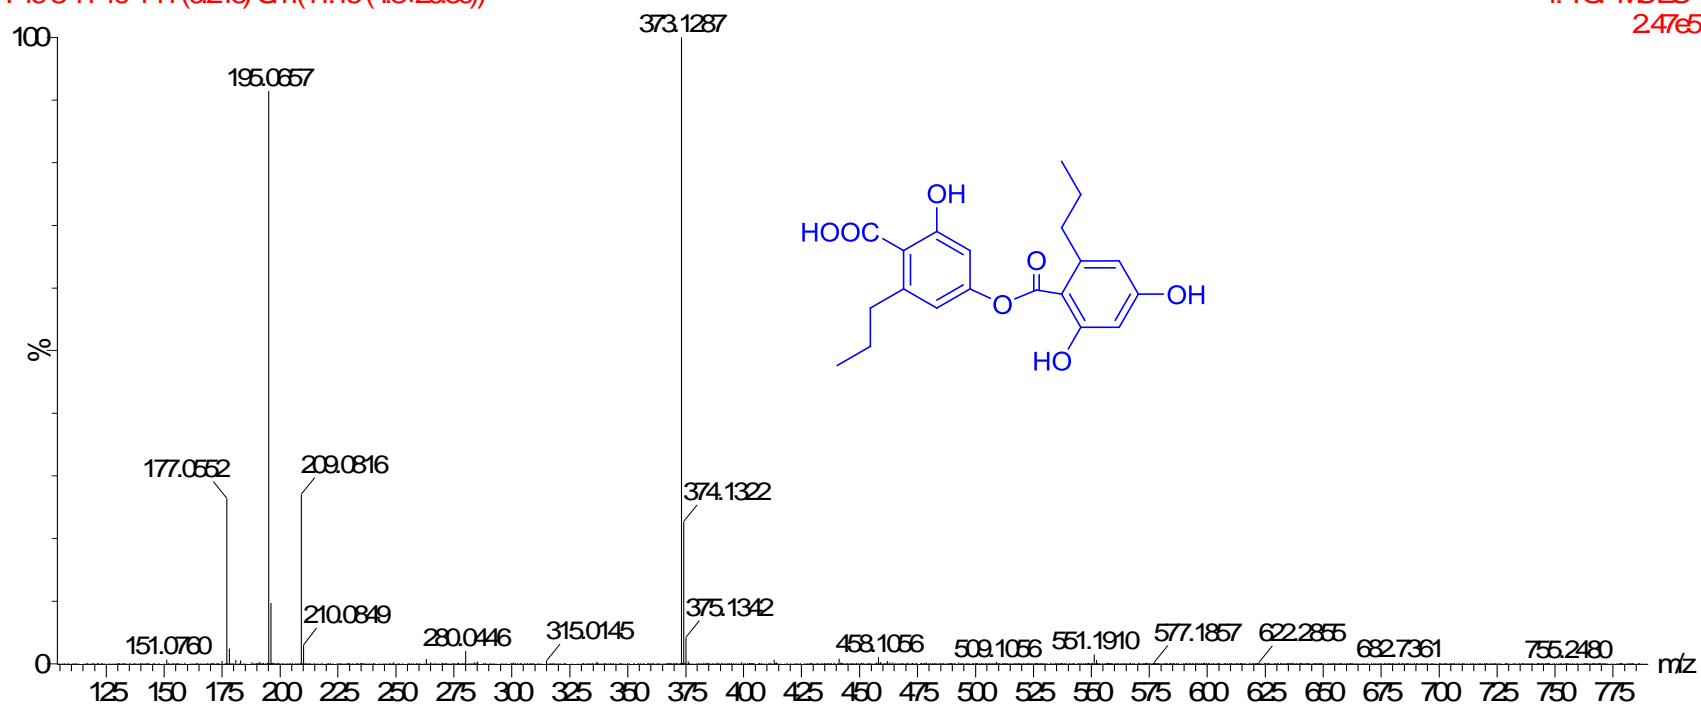

Figure S67. Negative mode HRESIMS data of compound 10.

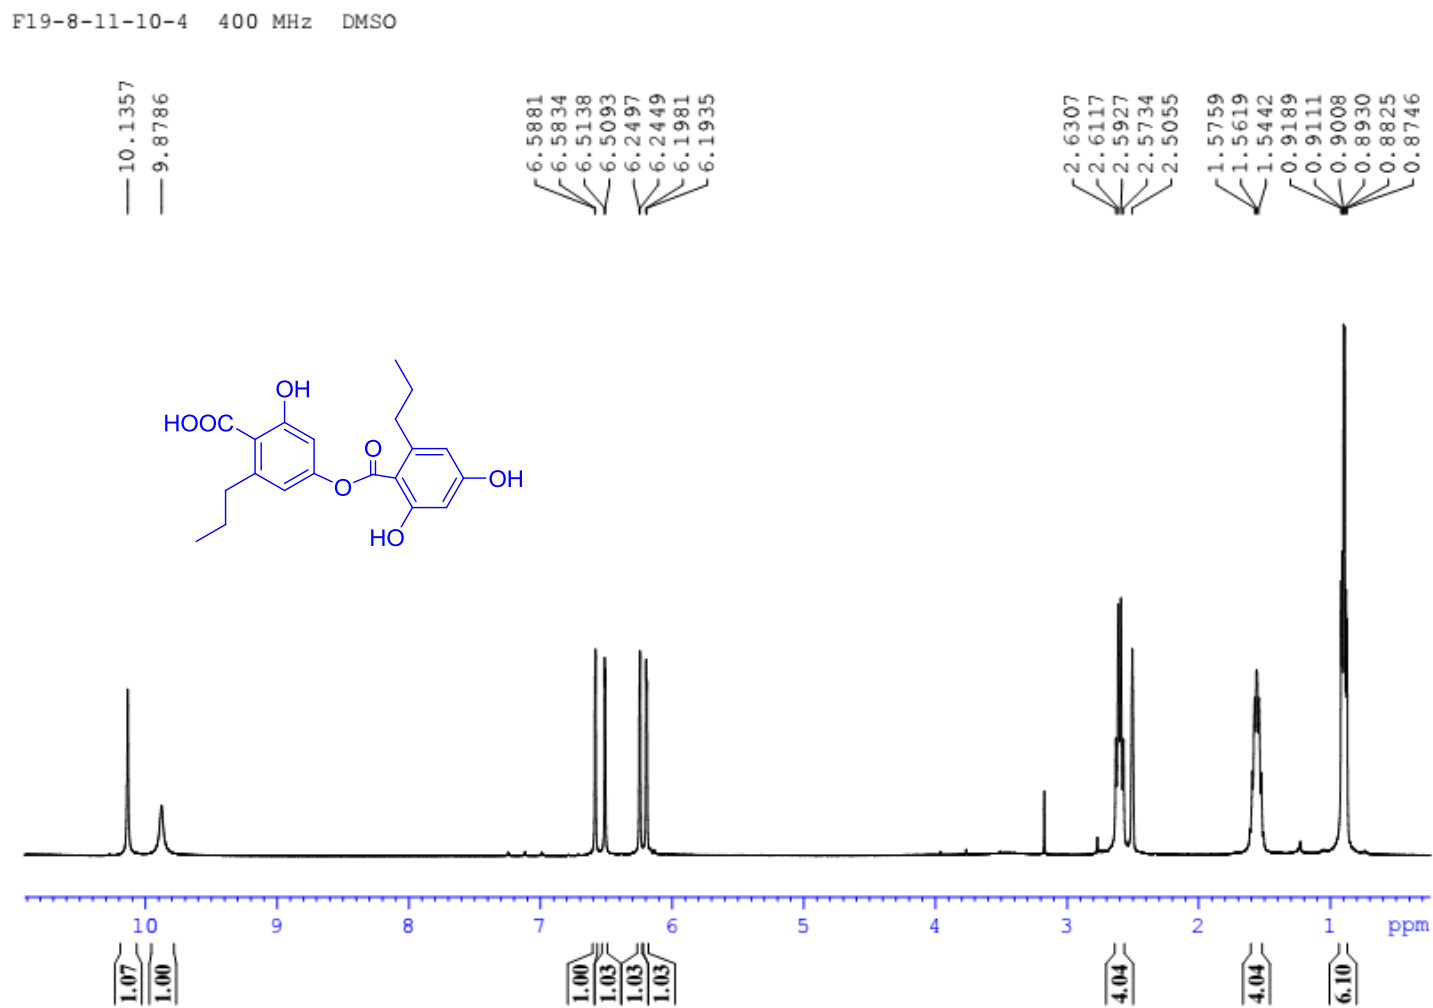

Figure S68.  $^1\text{H}$  NMR spectrum of compound **10** in DMSO- $d_6$  (400 MHz).

F19-8-11-10-4 APT 100 MHz DMSO

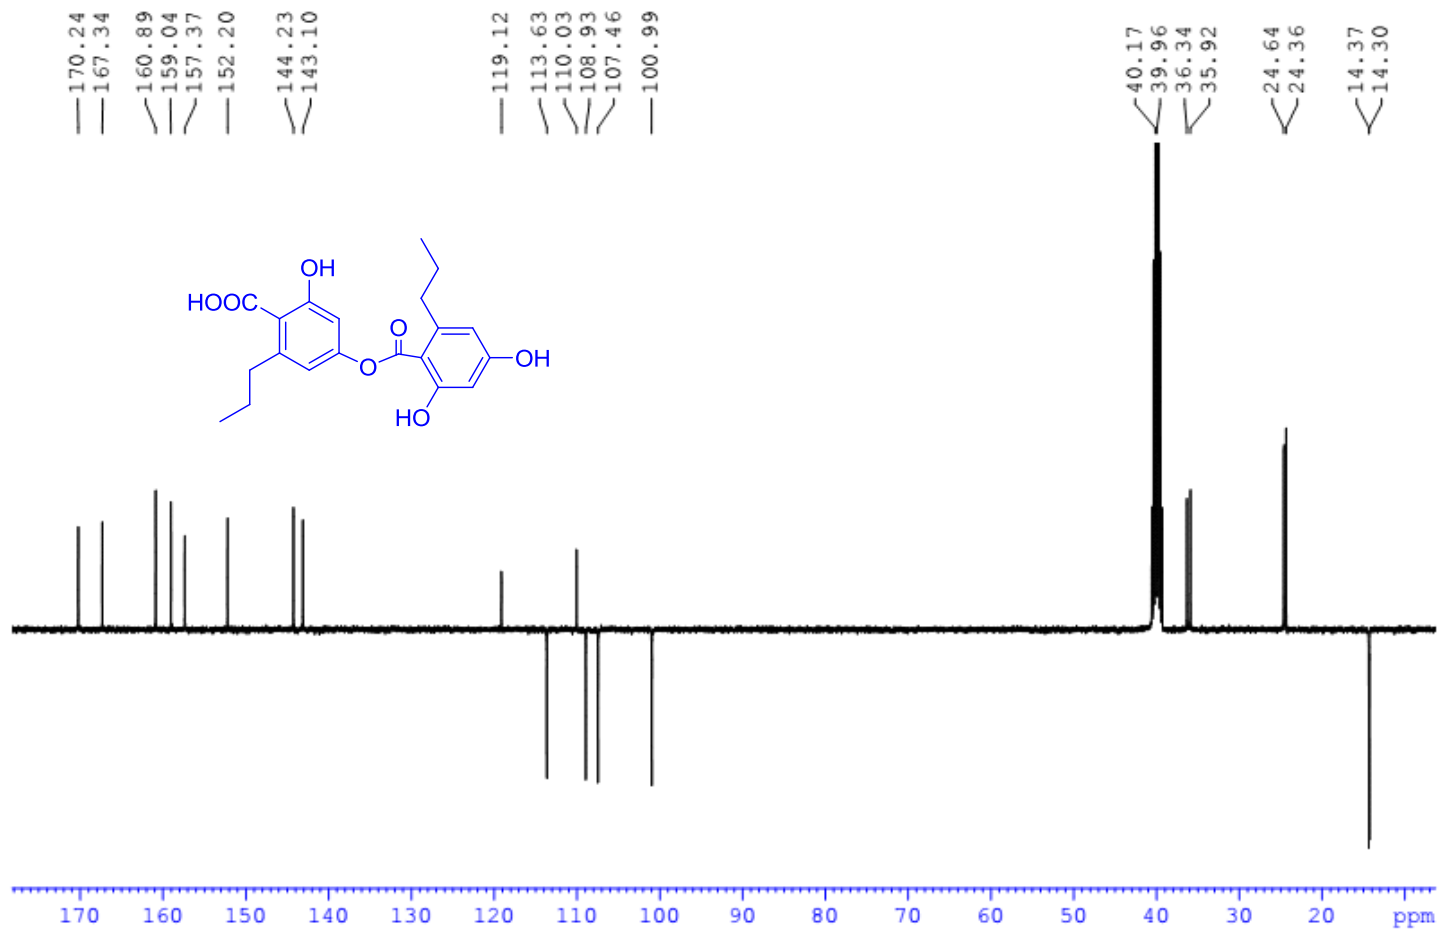

**Figure S69.** <sup>13</sup>C NMR spectrum of compound 10 in DMSO-d<sub>6</sub> (100 MHz).



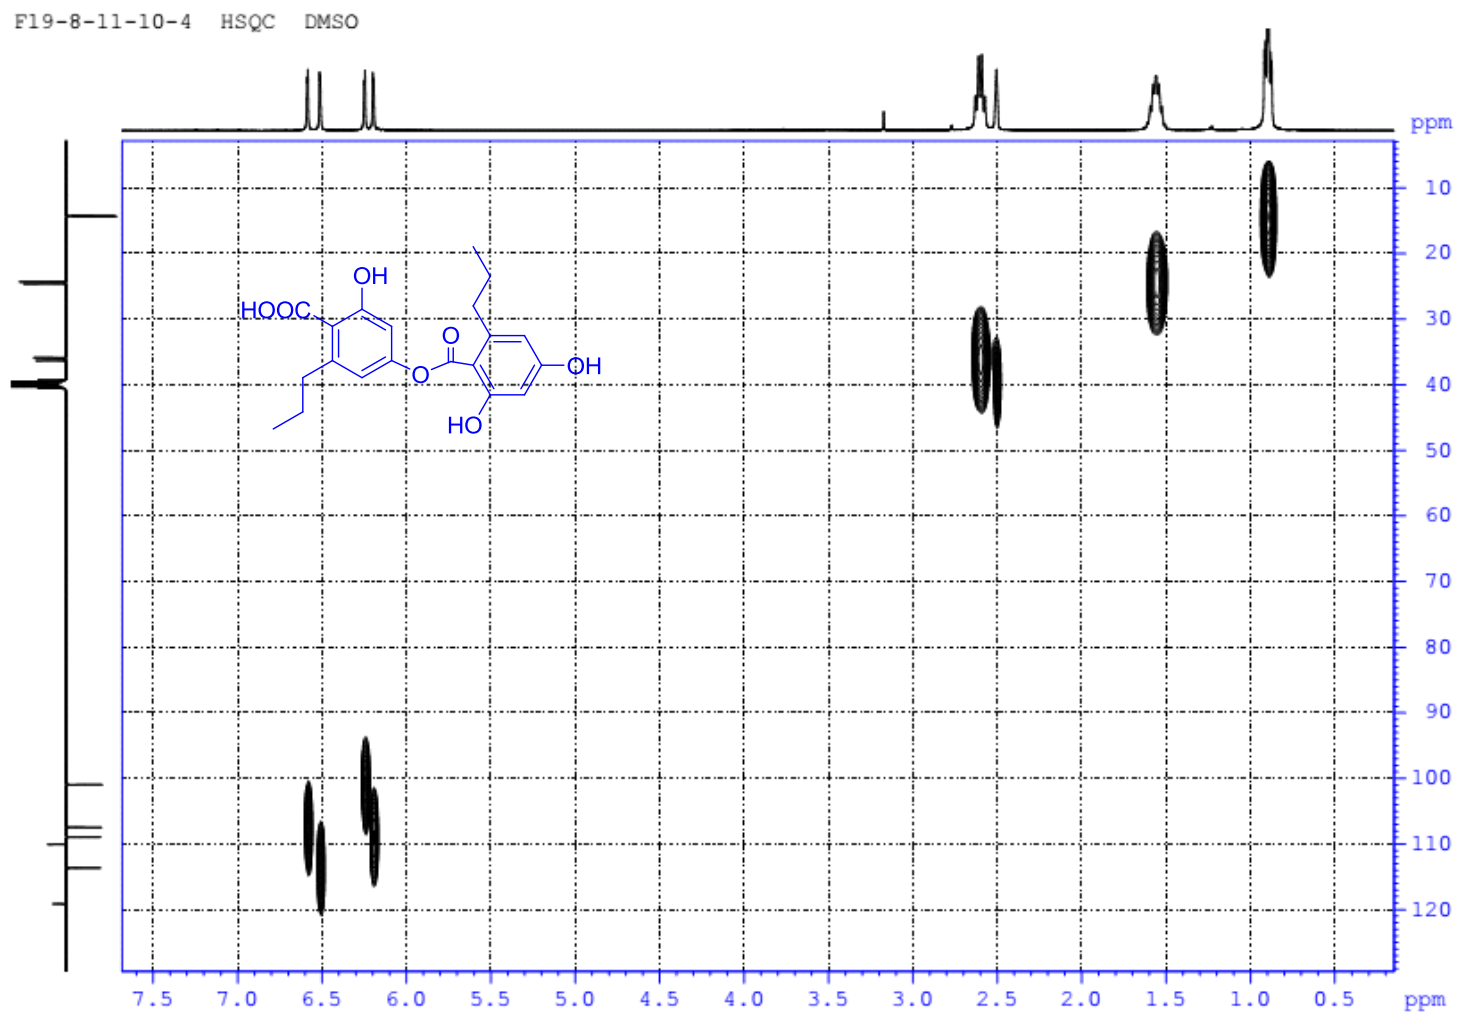

Figure S70. HSQC spectrum of compound 10 in DMSO-d6.

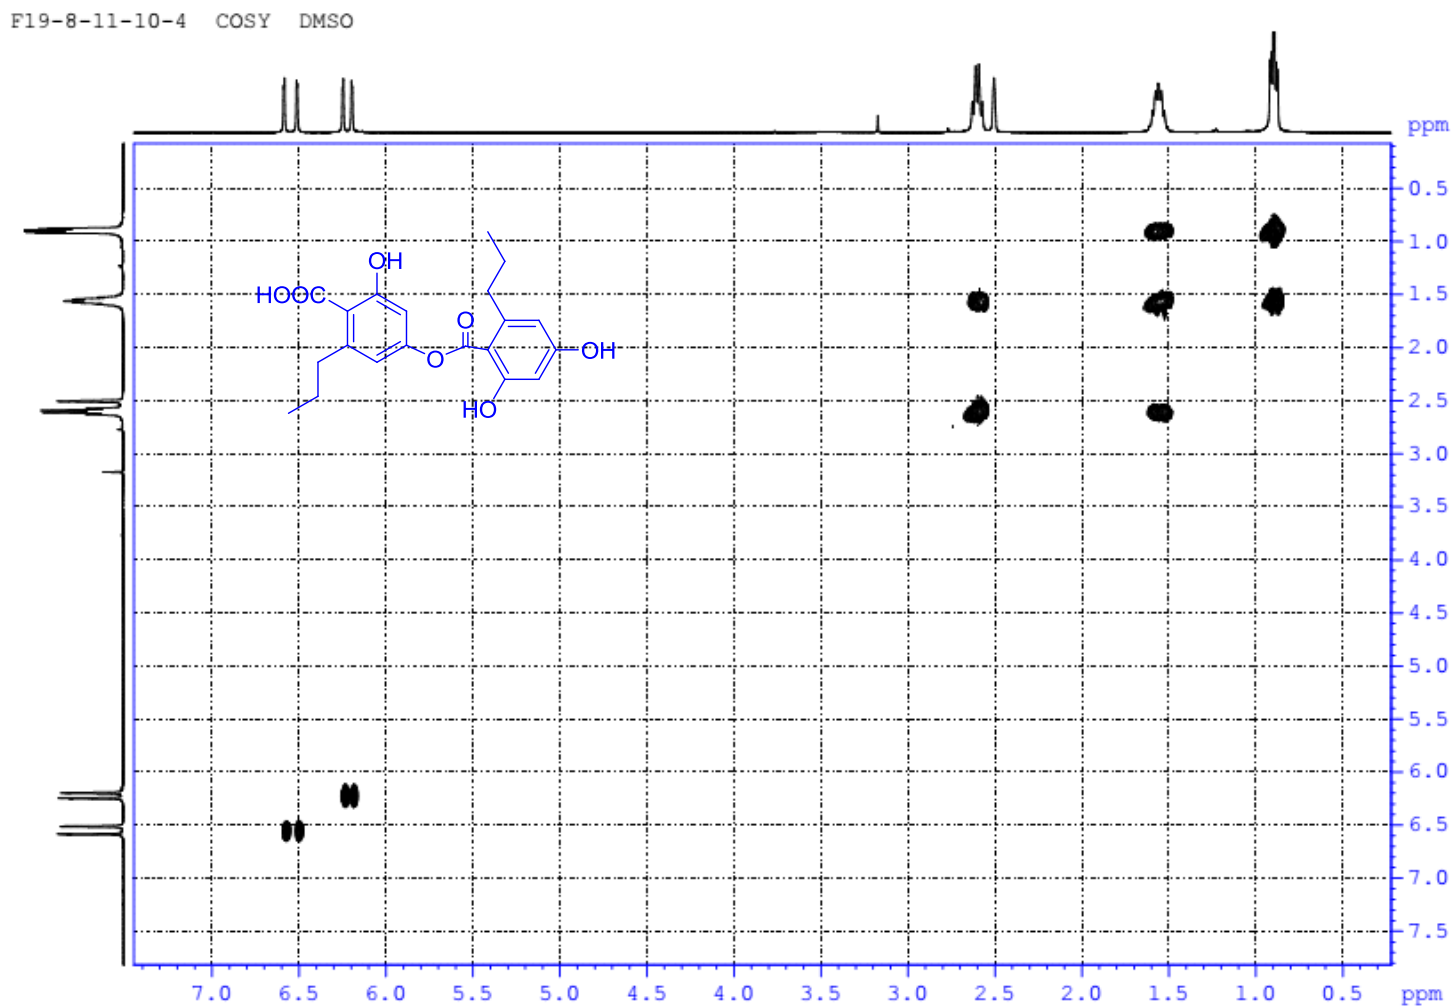

**Figure S71.** <sup>1</sup>H-<sup>1</sup>H COSY spectrum of compound **10** in DMSO-d<sub>6</sub>.

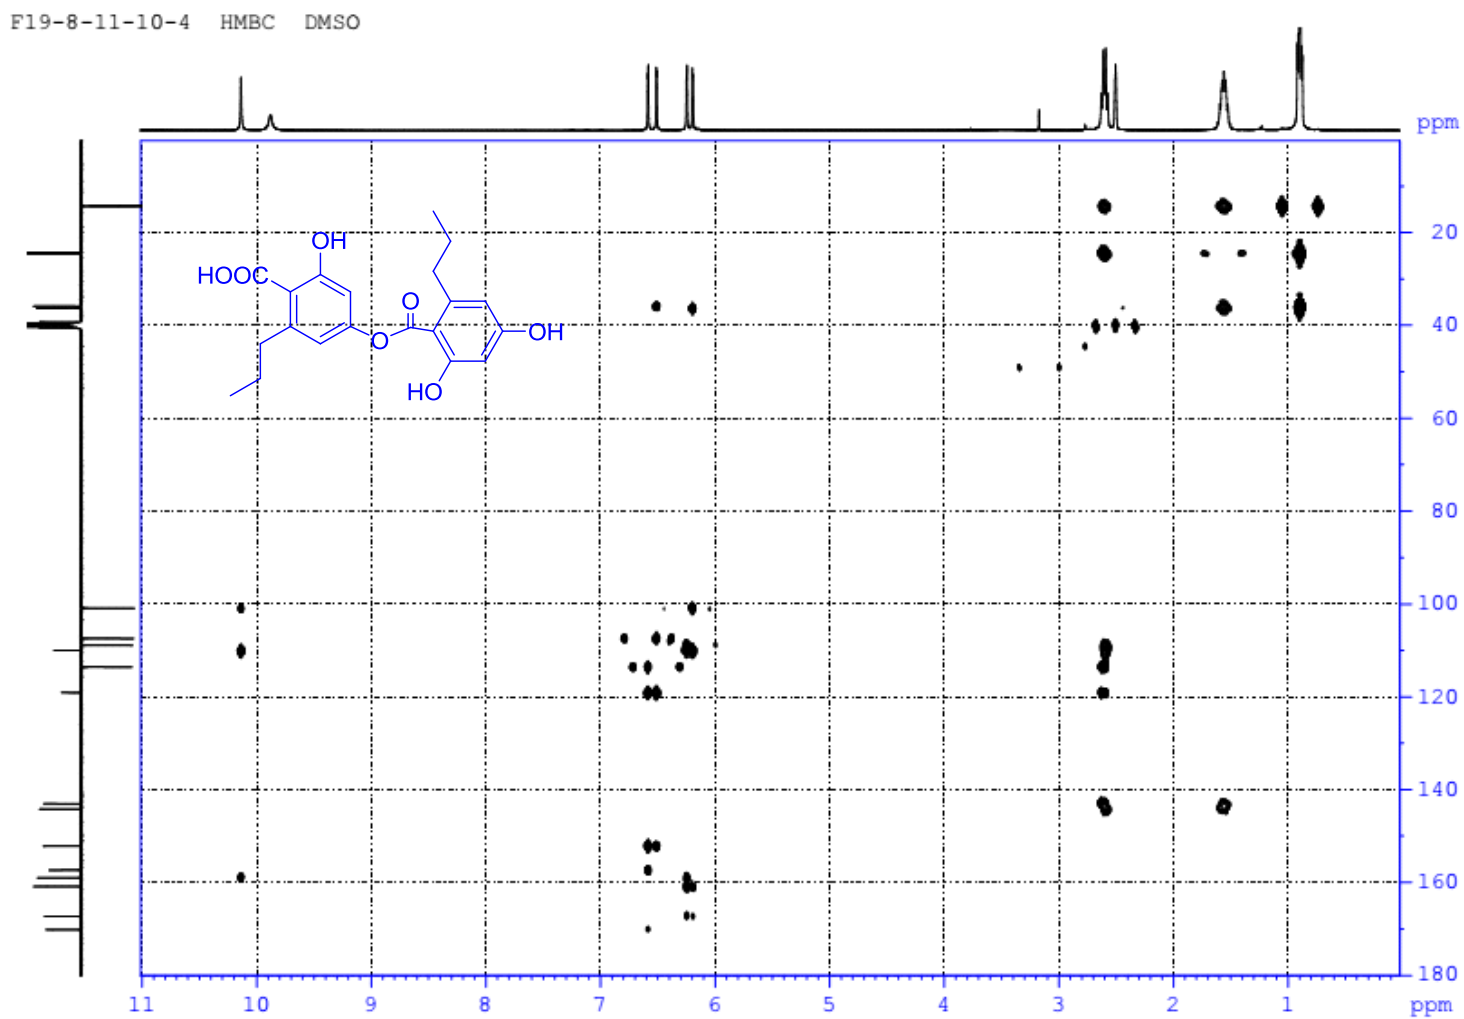

Figure S72. HMBC spectrum of compound 10 in DMSO-d6.

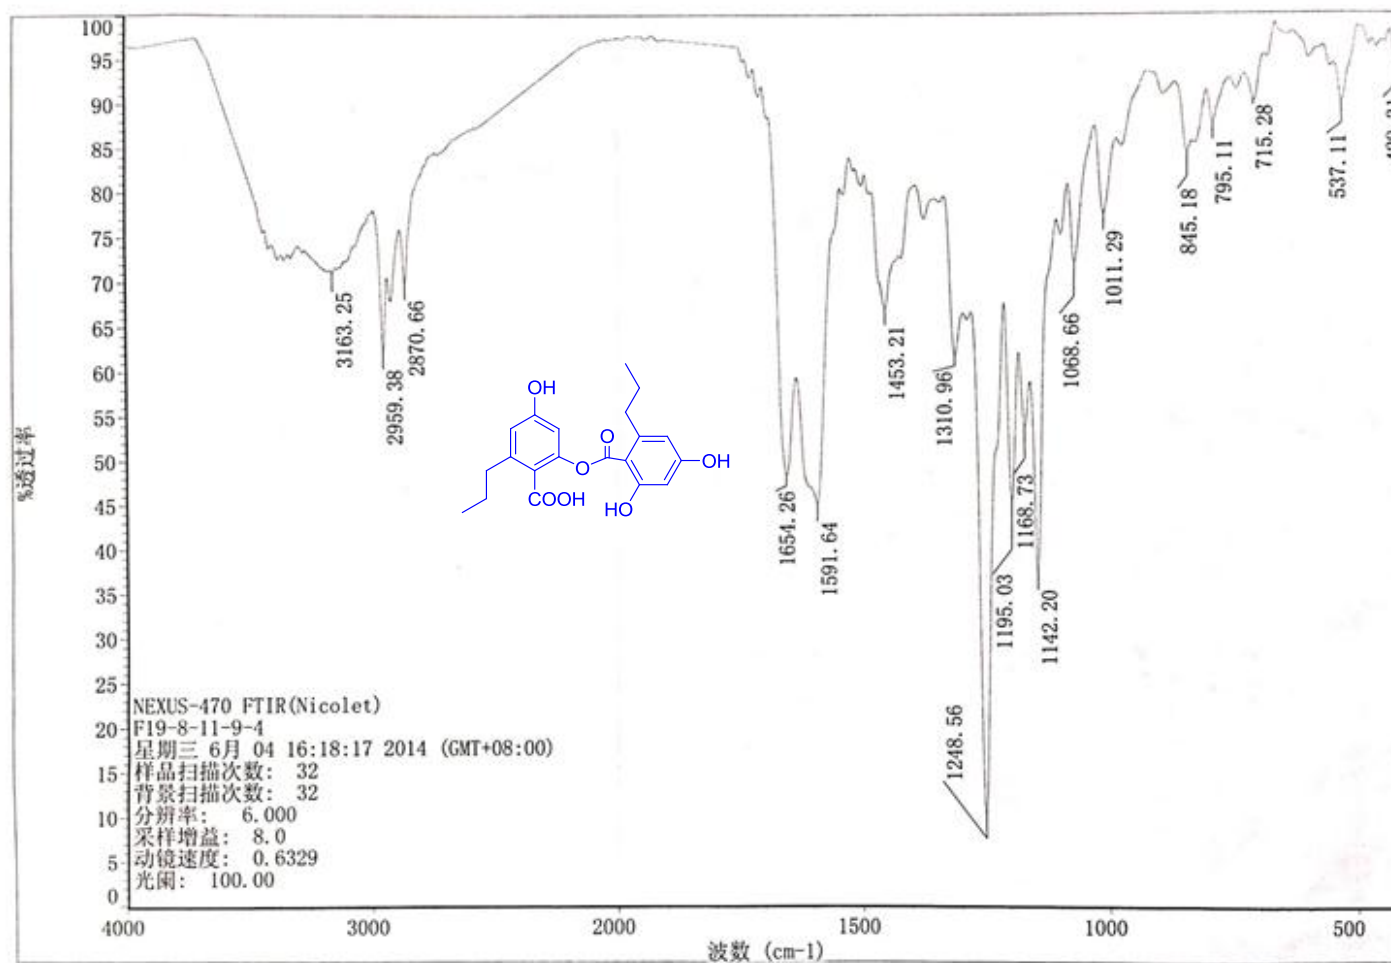

Figure S73. IR spectrum of compound 11.

Xevo G2 Q-TOF/YCA166#

F19-8-11-9-4 12 (0.233) Cm (10:16-(2:7+20:51))

07-Jul-2014

Waters

1: TOF MS ES-  
3.67e5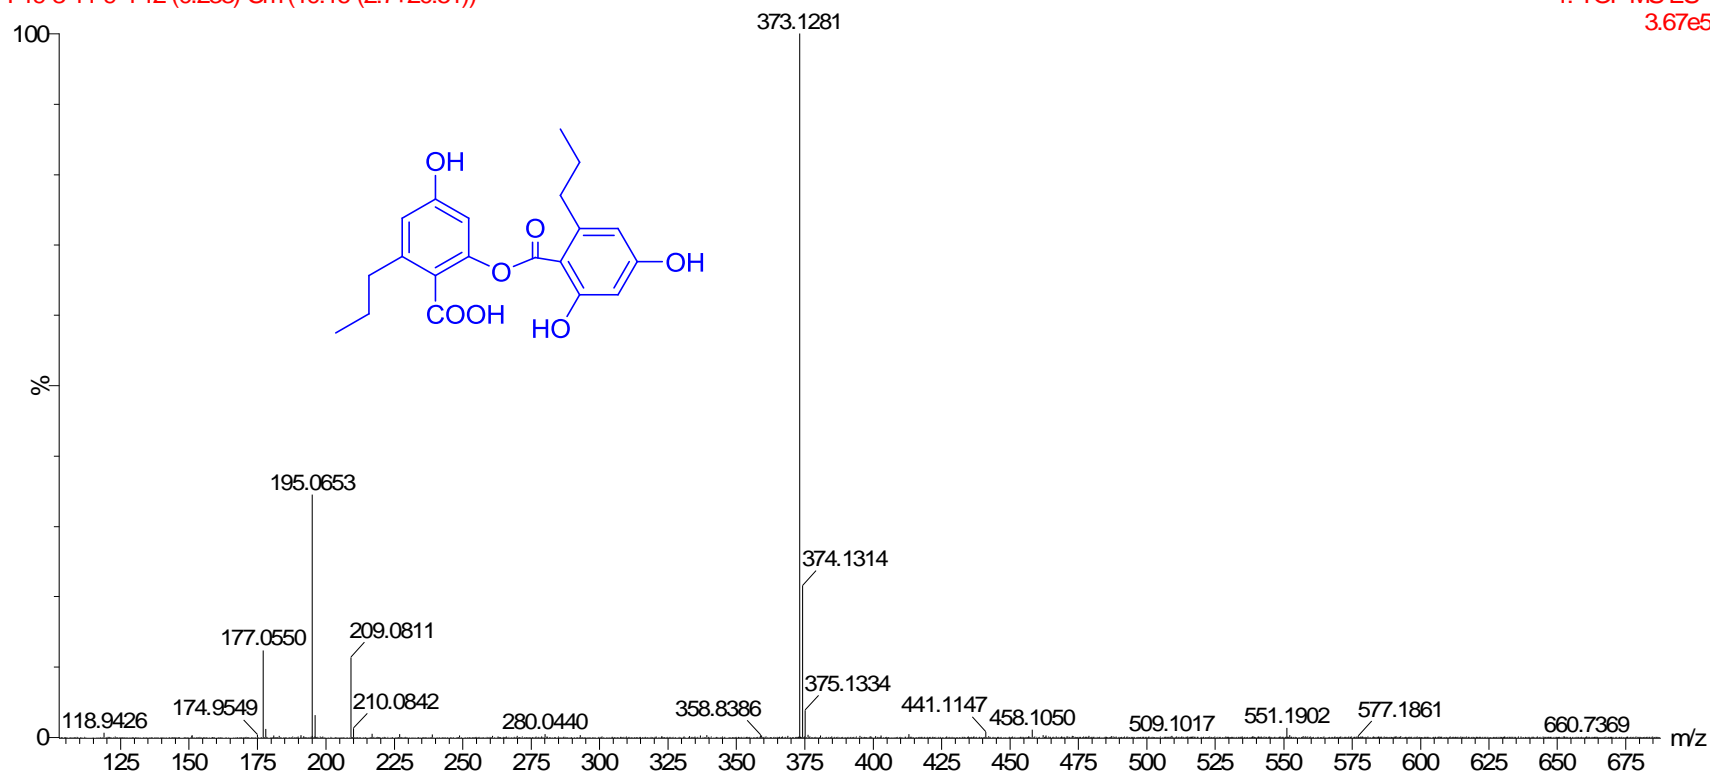

Figure S74. Negative mode HRESIMS data of compound 11.

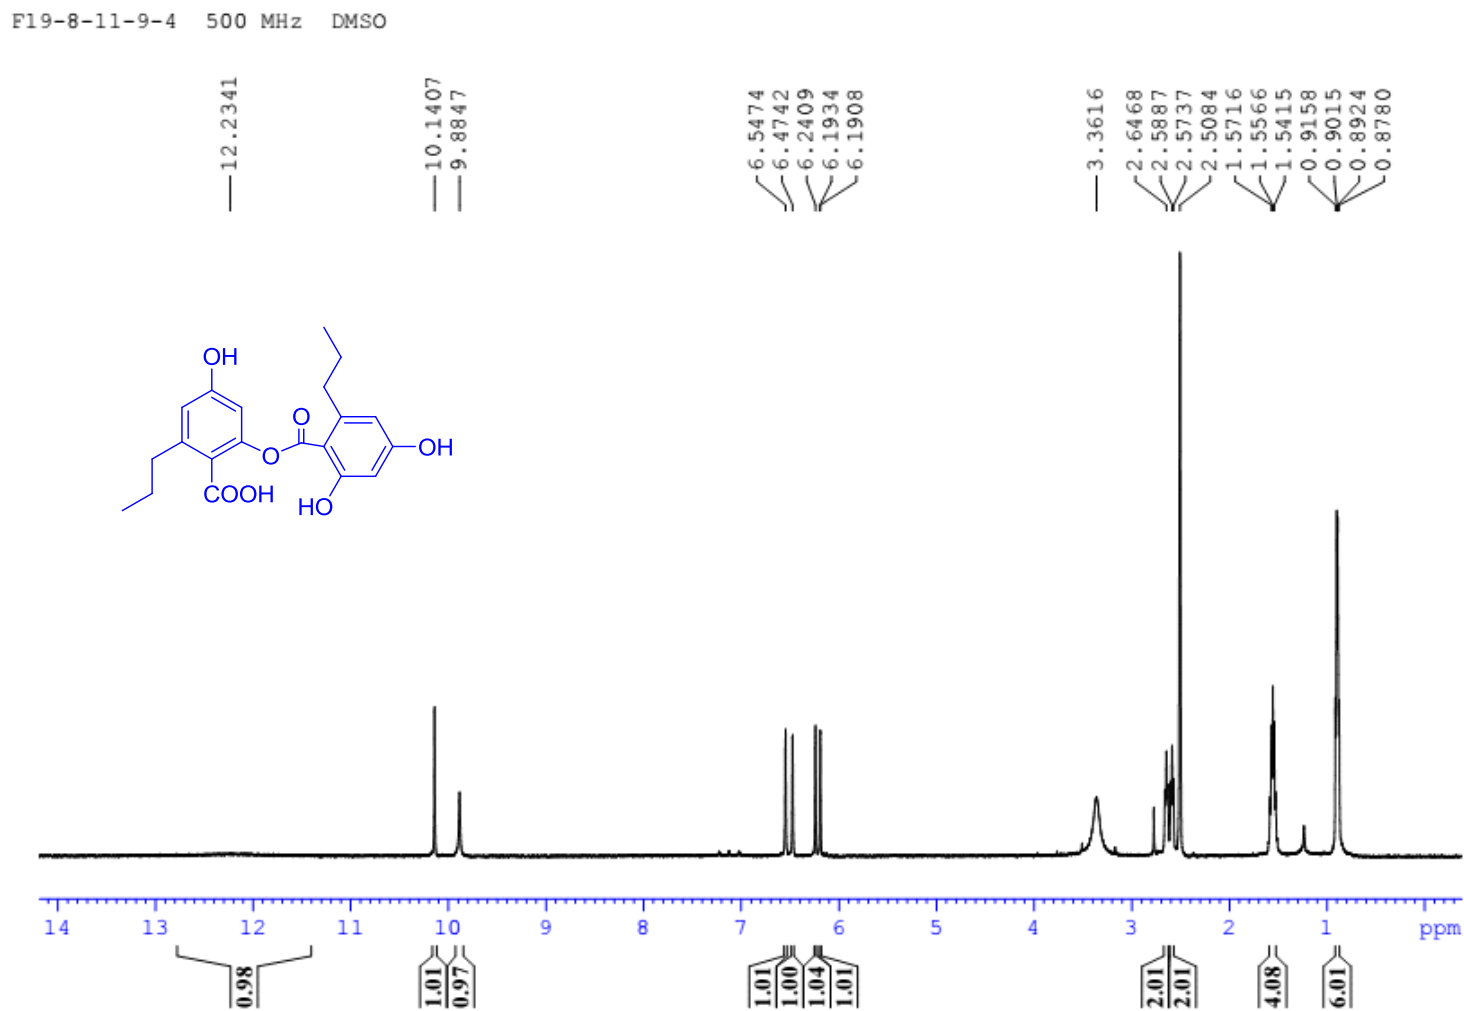

**Figure S75.**  $^1\text{H}$  NMR spectrum of compound **11** in DMSO- $d_6$  (500 MHz).

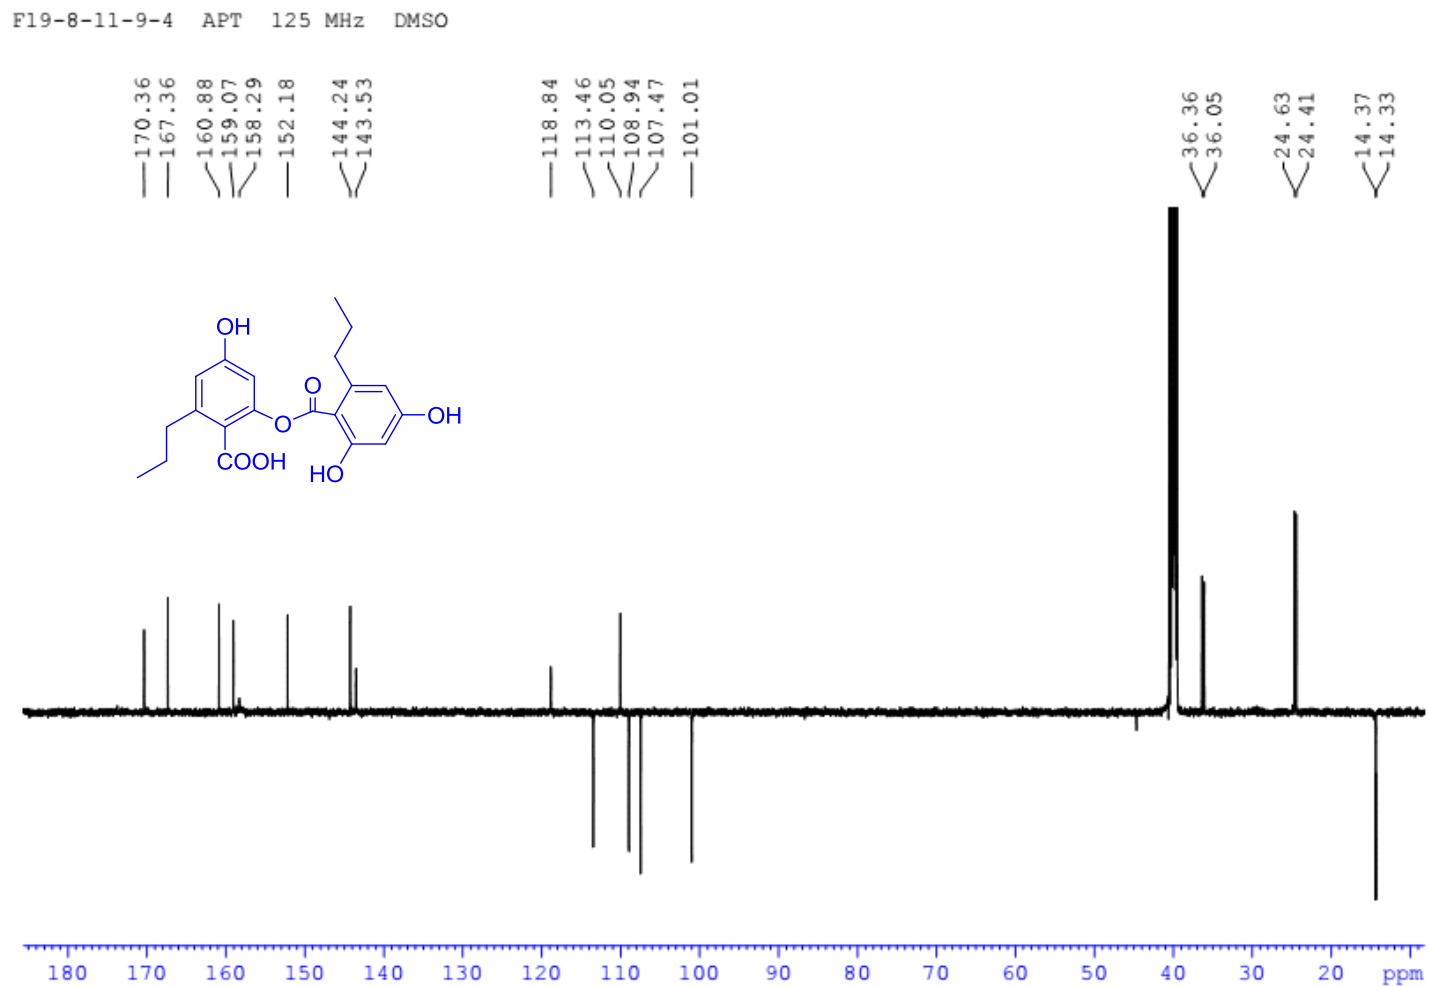

**Figure S76.**  $^{13}\text{C}$  NMR spectrum of compound **11** in DMSO- $d_6$  (100MHz).

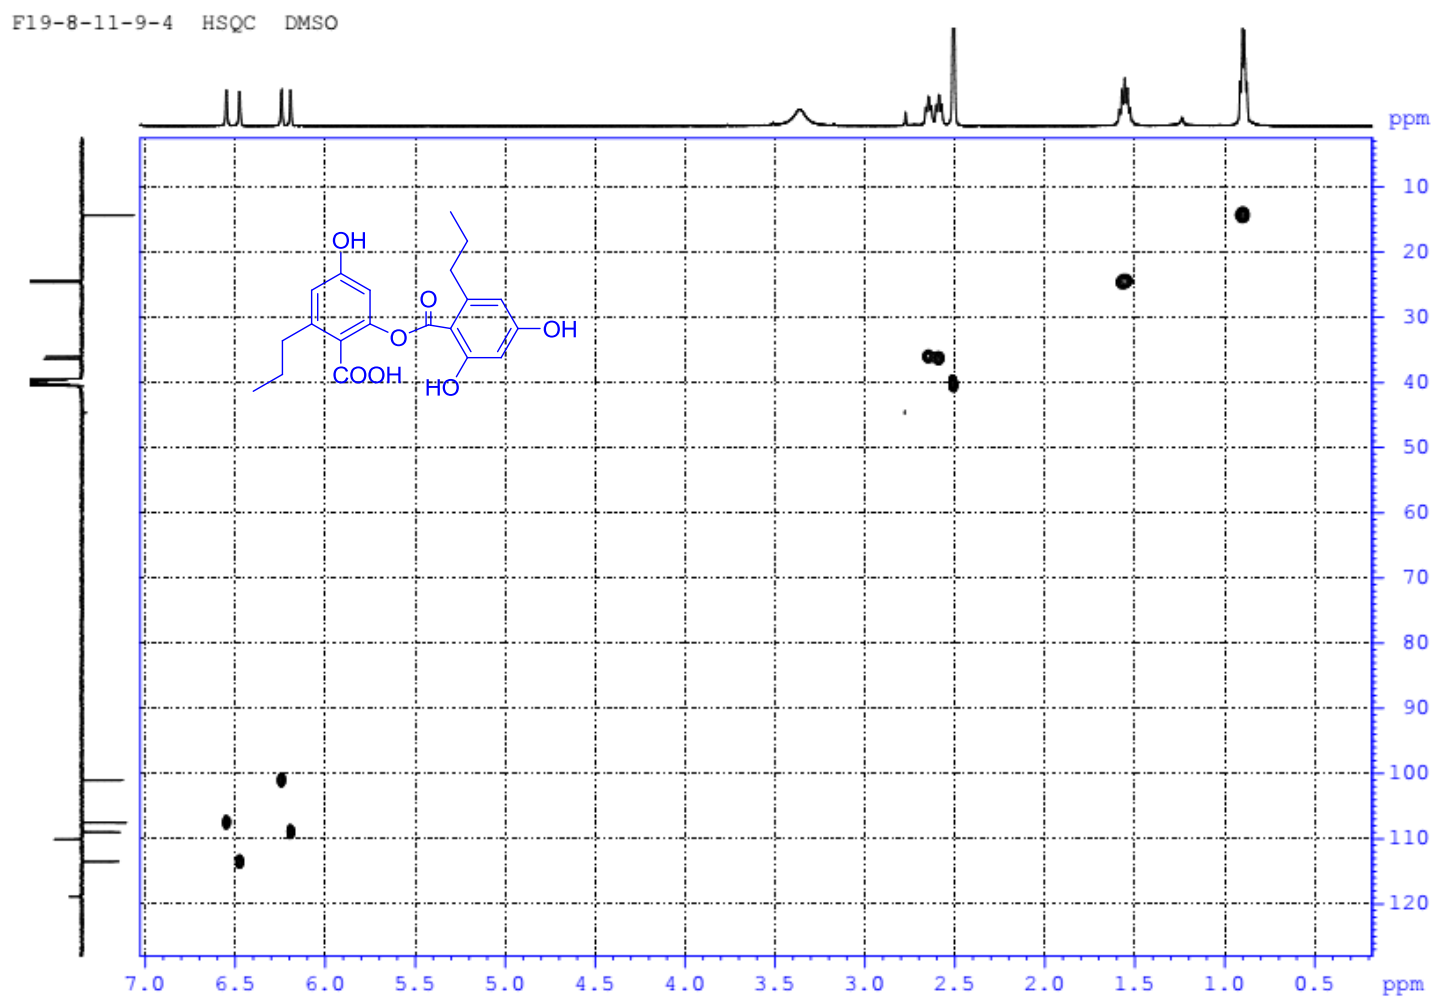

Figure S77. HSQC spectrum of compound 11 in DMSO-d<sub>6</sub>.



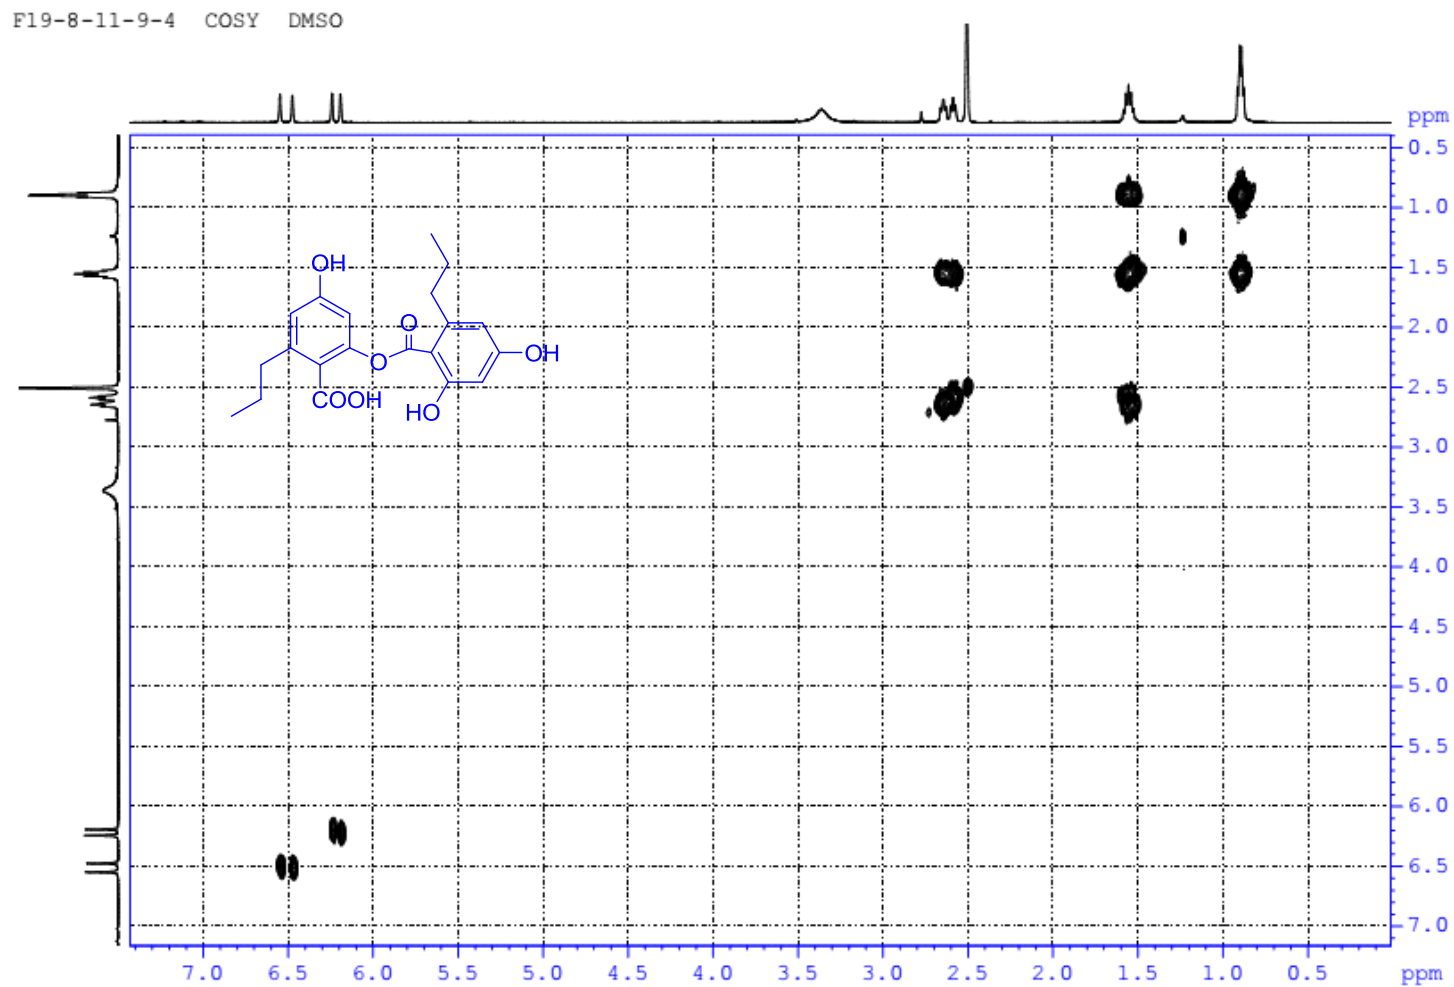

**Figure S78.**  $^1\text{H}$ - $^1\text{H}$  COSY spectrum of compound **11** in DMSO- $d_6$ .

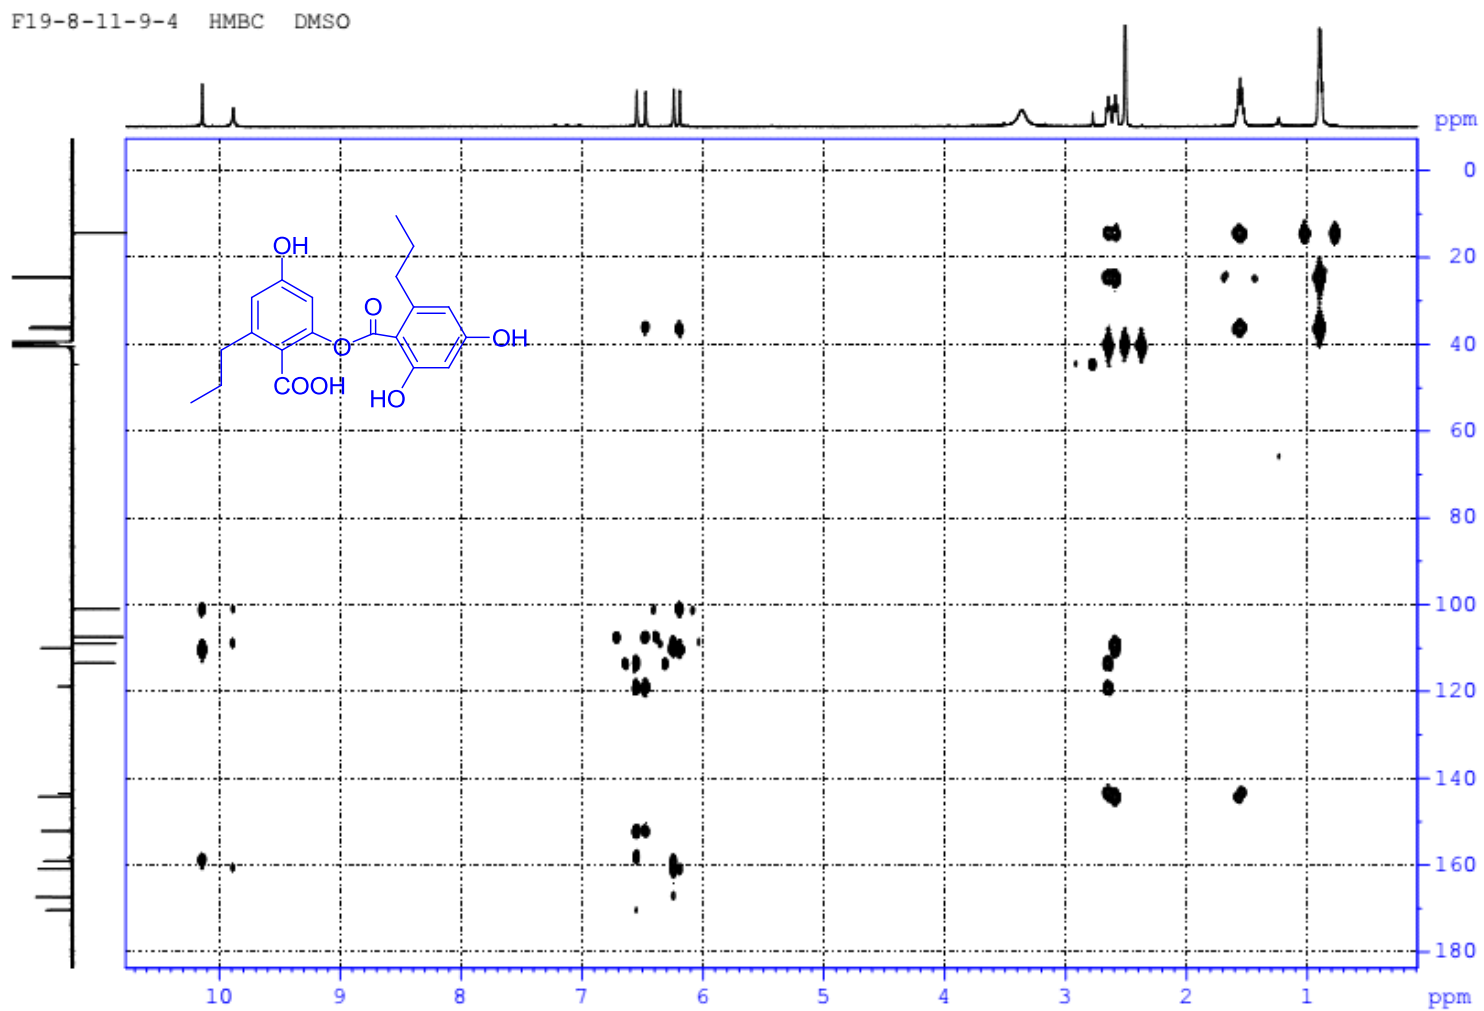

Figure S79. HMBC spectrum of compound 11 in DMSO-d6.

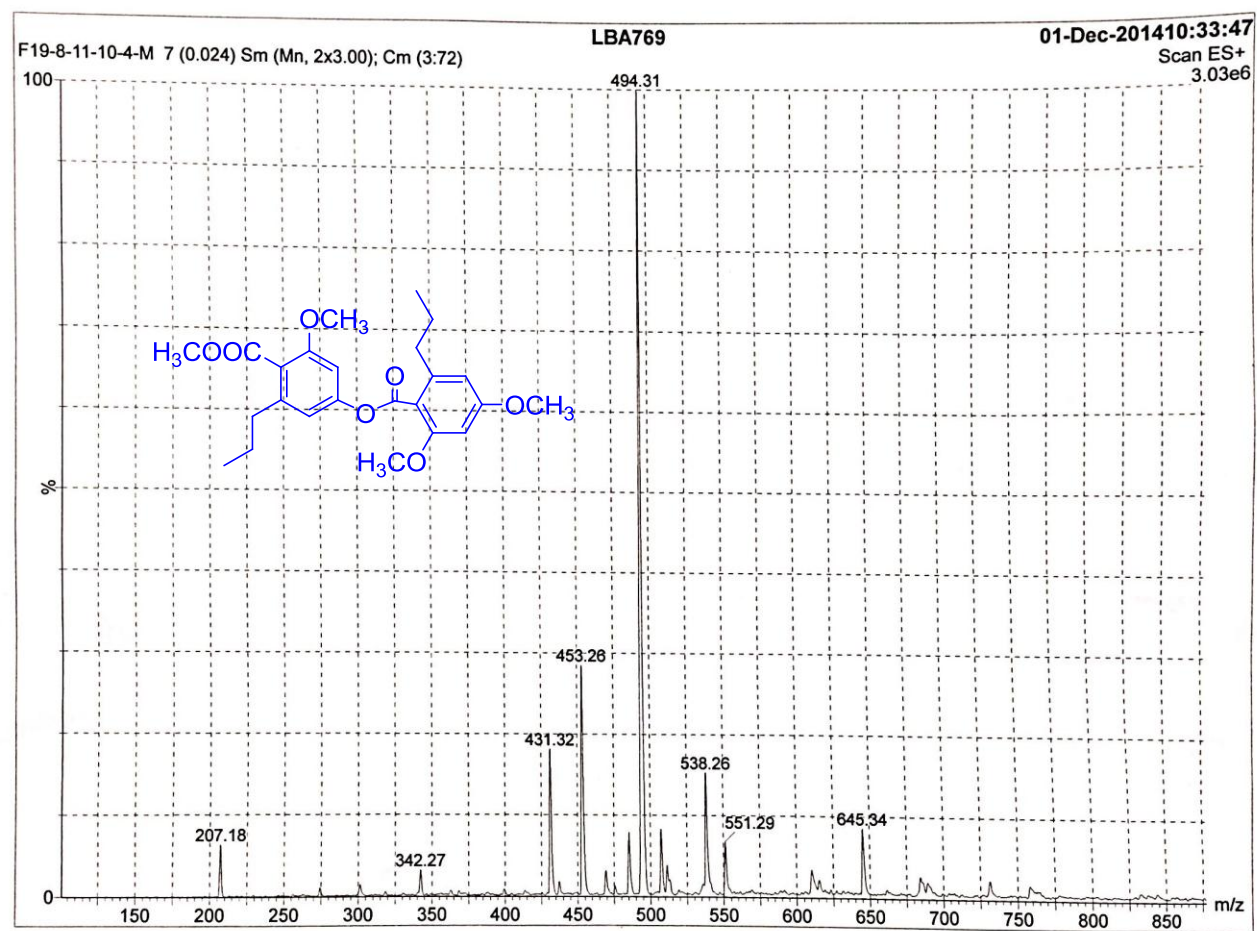

Figure S80. Negative mode ESIMS data of compound 10a.

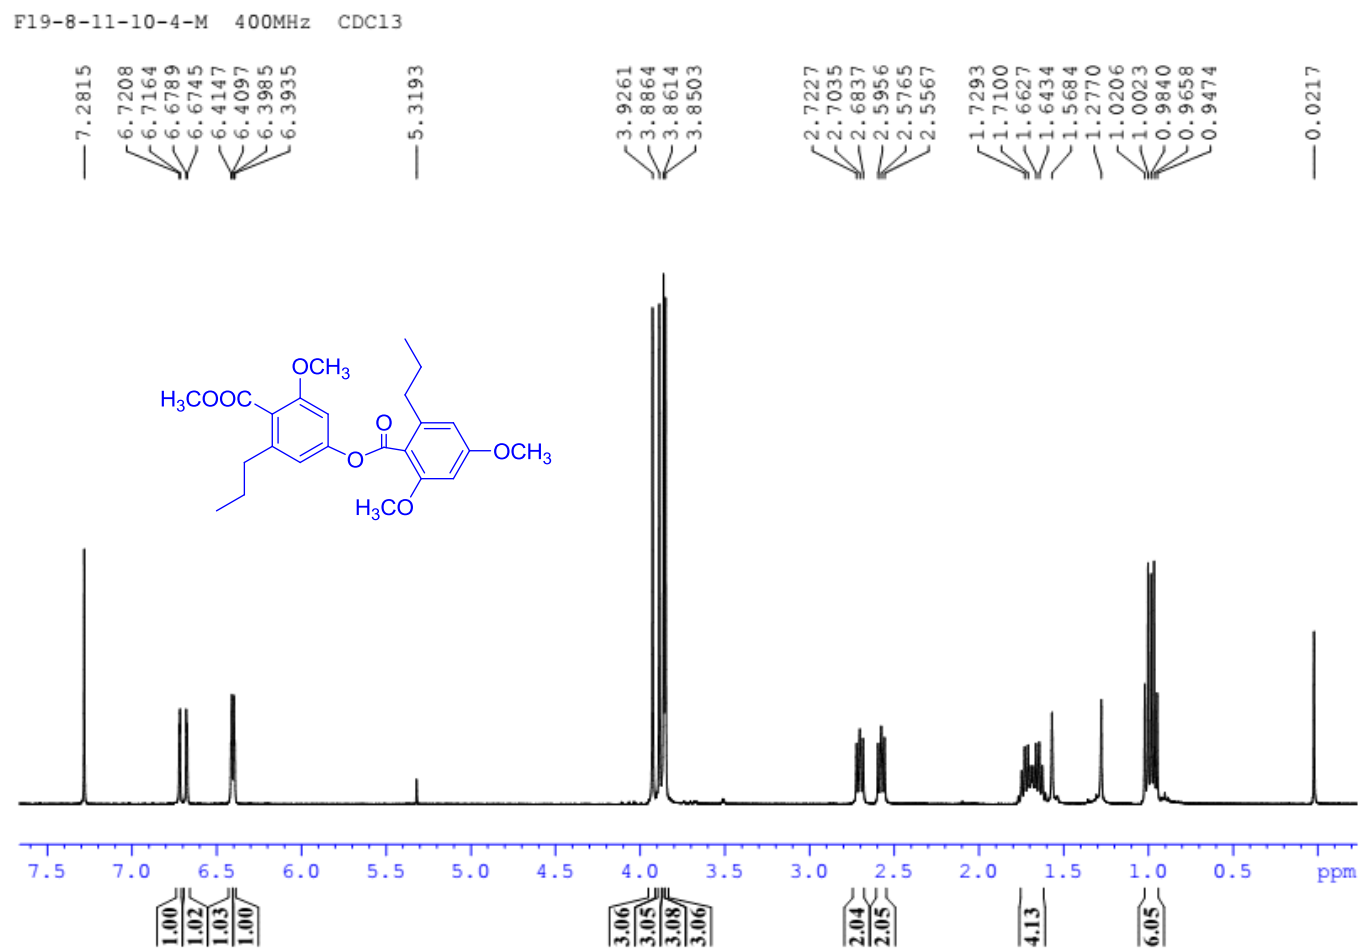

Figure S81. <sup>1</sup>H NMR spectrum of compound **10a** in CDCl<sub>3</sub> (400 MHz).

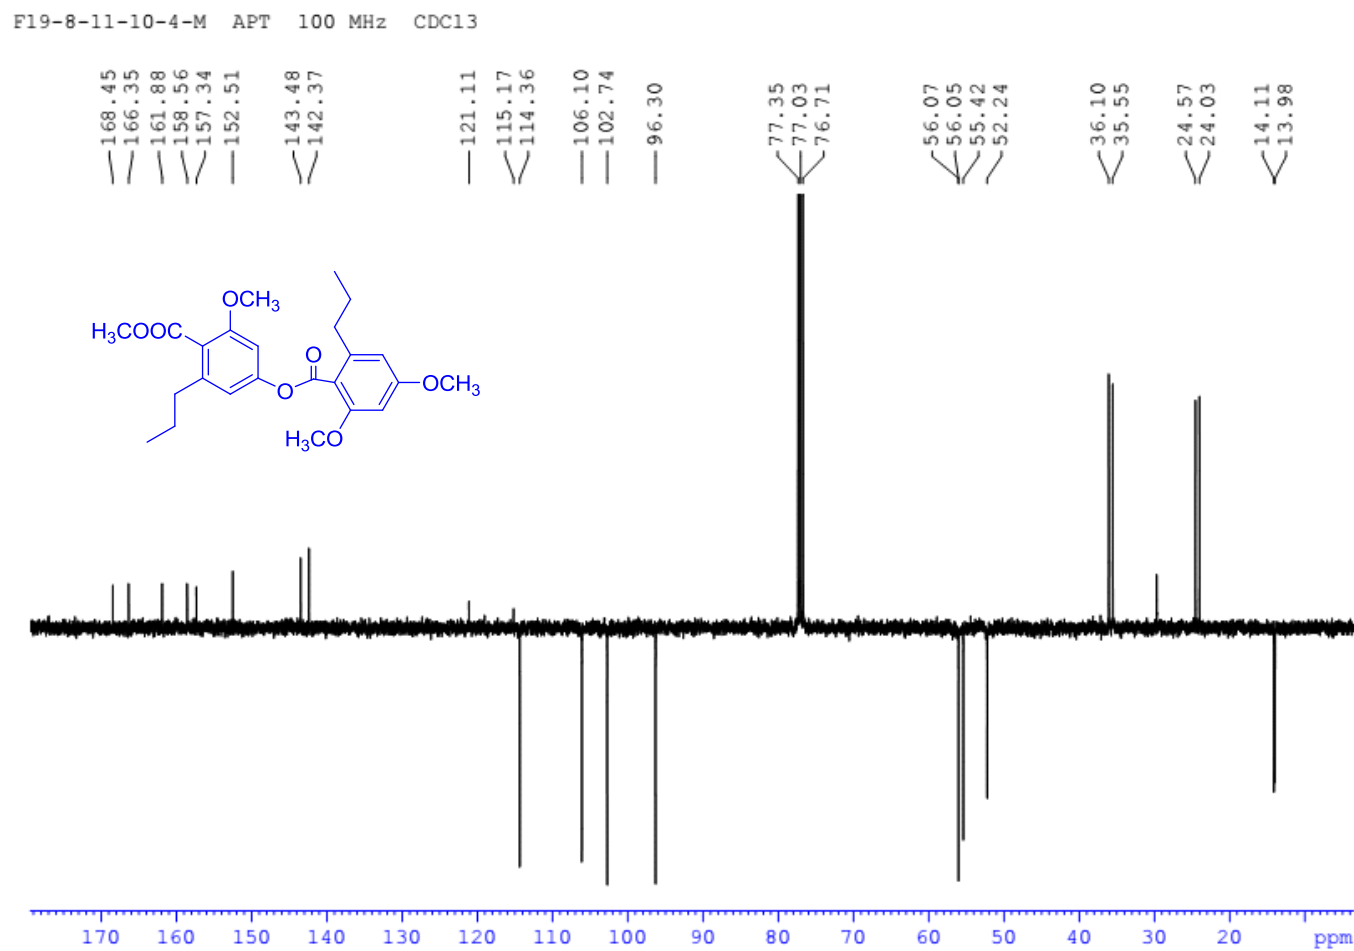

**Figure S82.** <sup>13</sup>C NMR spectrum of compound **10a** in CDCl<sub>3</sub> (100 MHz).

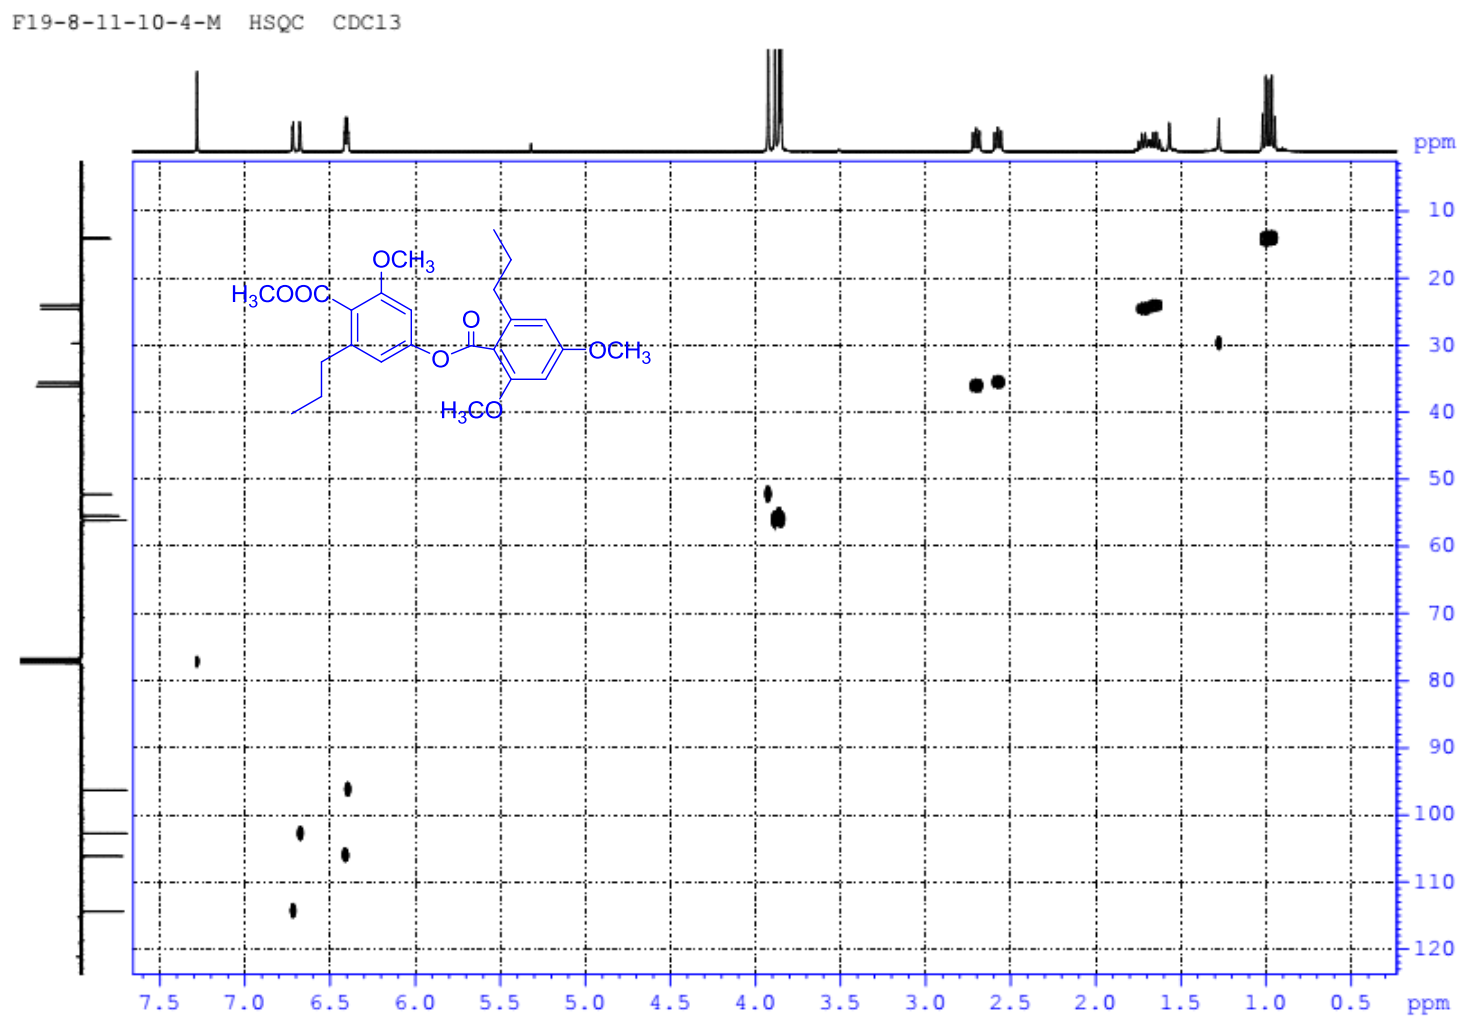

**Figure S83.** HSQC spectrum of compound **10a** in CDCl<sub>3</sub>.

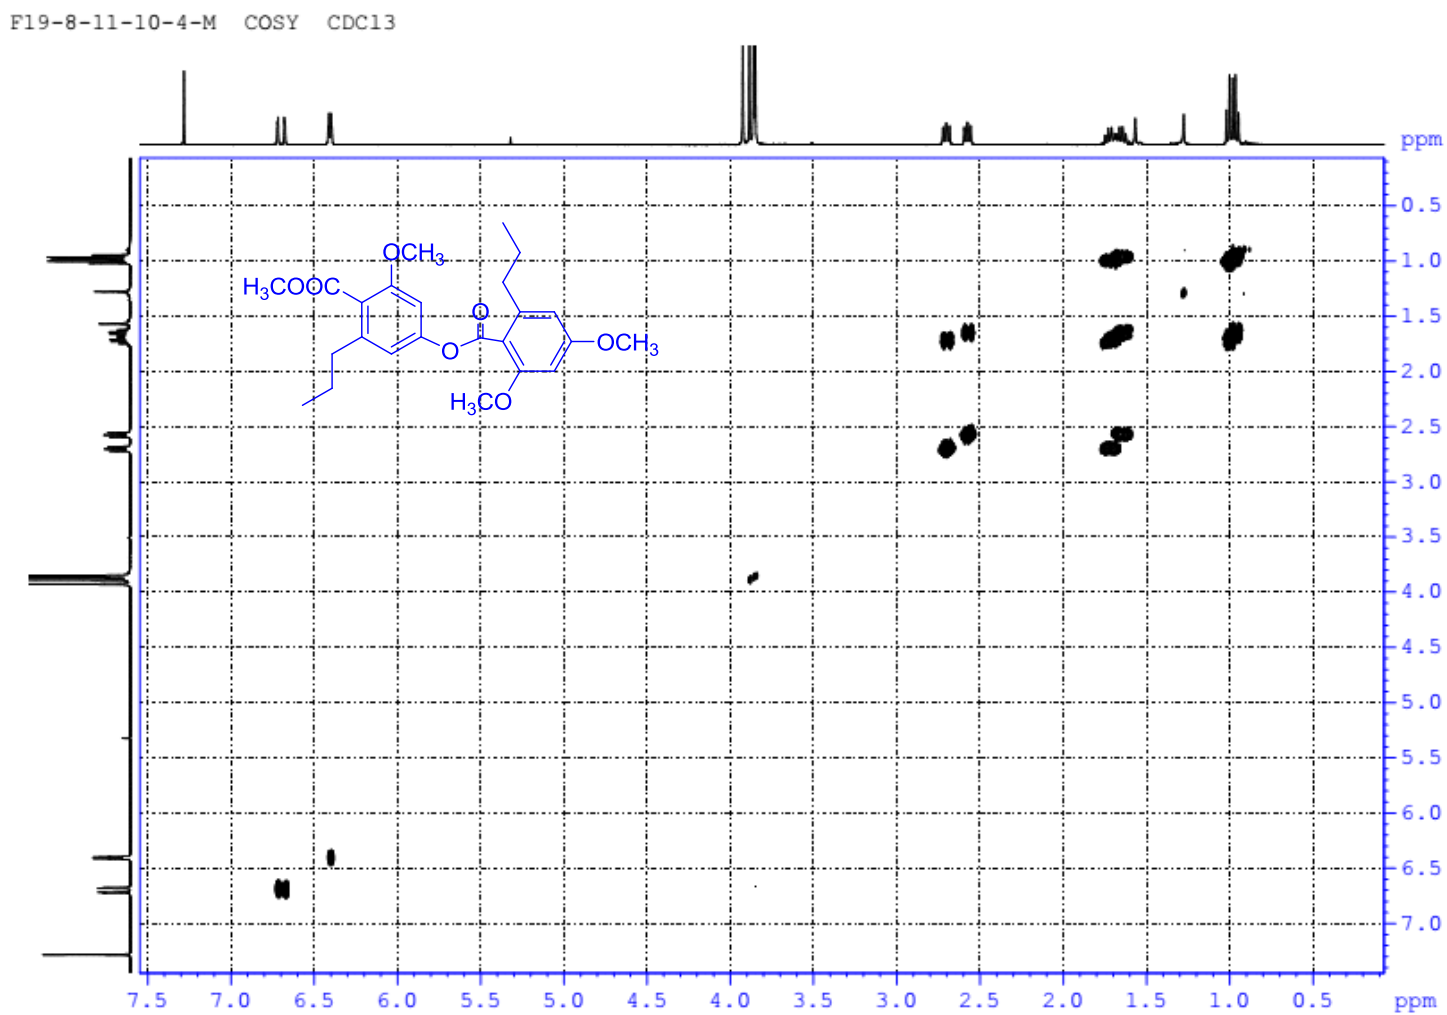

Figure S84.  $^1\text{H}$ - $^1\text{H}$  COSY spectrum of compound **10a** in  $\text{CDCl}_3$ .

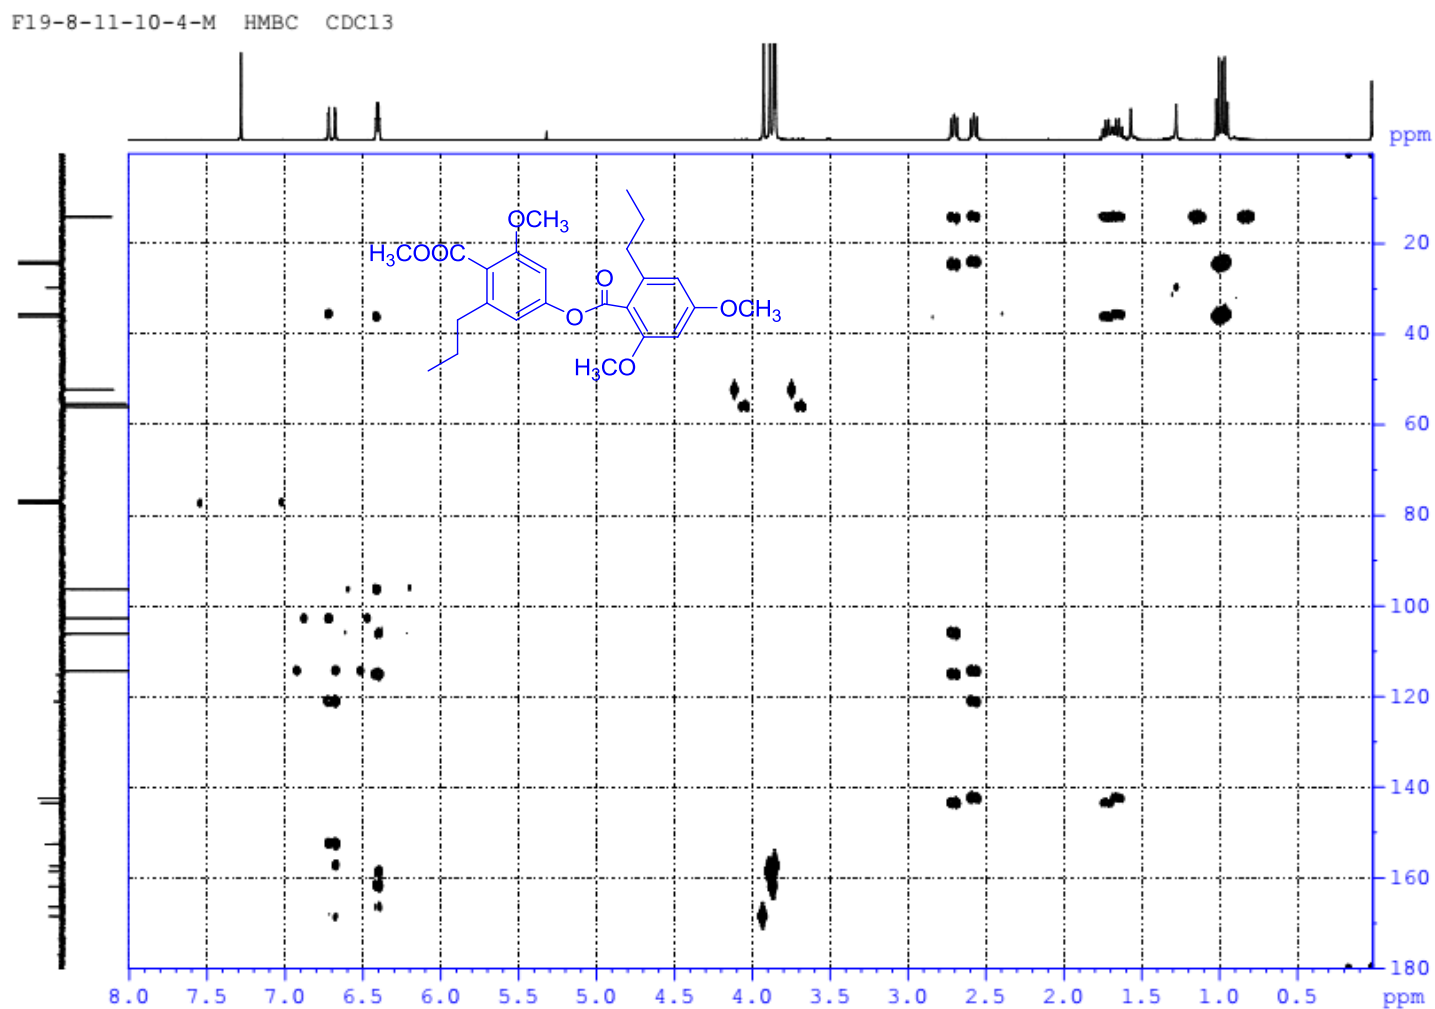

Figure S85. HMBC spectrum of compound **10a** in CDCl<sub>3</sub>.
